# Supplementary material for: Multiple RNA recognition patterns during microRNA biogenesis in plants
Source: HighWire-hosted journal article supplement (doi:10.1101/gr.153387.112), 2013-08-29
Supplement: Table_S2.xlsx [file Table_S2.xlsx]

## Sheet: Fiery
MIRNA_Precursor	Strand	Position	Tag	Length	Hits	Abundance
MIR156a	+	647	TGACAGAAGAGAGTGAGC	18	6	6
MIR156a	+	647	TGACAGAAGAGAGTGAGCACAC	22	5	2
MIR156a	+	709	GCTCACTGCTCTTTCTGTCAGATTCCGGTGCTGATCTCTT	40	1	7
MIR156a	+	729	GATTCCGGTGCTGATCTCTTTGGCCTGTCTTCGTTCTCTA	40	1	1
MIR156a	+	731	TTCCGGTGCTGATCTCTTTGGCCTGTCTTCGTTCTCTATG	40	1	18
MIR156a	+	732	TCCGGTGCTGATCTCTTTGGCCTGTCTTCGTTCTCTATGT	40	1	4
MIR156a	+	756	TCTTCGTTCTCTATGTCTCAATCTC	25	1	2
MIR156a	+	757	CTTCGTTCTCTATGTCTCAATCTC	24	1	2
MIR156a	+	758	TTCGTTCTCTATGTCTCAATCTC	23	1	2
MIR156a	+	759	TCGTTCTCTATGTCTCAATCTC	22	1	19
MIR156a	+	760	CGTTCTCTATGTCTCAATCTC	21	1	296
MIR156a	+	761	GTTCTCTATGTCTCAATCTC	20	1	1535
MIR156a	+	761	GTTCTCTATGTCTCAATCT	19	1	2
MIR156a	+	762	TTCTCTATGTCTCAATCTC	19	1	13
MIR156a	+	763	TCTCTATGTCTCAATCTC	18	1	12
MIR156b	+	344	TGACAGAAGAGAGTGAGC	18	6	6
MIR156b	+	400	GCGTGCTCACCTCTCTTTCTGTCAGTTGCCTATCTCTGCC	40	1	3
MIR156b	+	403	TGCTCACCTCTCTTTCTGTCAGTTGCCTATCTCTGCCTGC	40	1	3
MIR156b	+	404	GCTCACCTCTCTTTCTGTCAGTTGCCTATCTCTGCCTGCT	40	1	3
MIR156b	+	426	TGCCTATCTCTGCCTGCTTGACCTCTCTCTCTCTCTCTCT	40	1	43
MIR156b	+	427	GCCTATCTCTGCCTGCTTGACCTCTCTCTCTCTCTCTCTC	40	1	1
MIR156b	+	448	CTCTCTCTCTCTCTCTCTC	19	11	1
MIR156b	+	448	CTCTCTCTCTCTCTCTCTCTC	21	7	1
MIR156b	+	449	TCTCTCTCTCTCTCTCTCTCTC	22	6	1
MIR156b	+	450	CTCTCTCTCTCTCTCTCTC	19	11	1
MIR156b	+	450	CTCTCTCTCTCTCTCTCTCTC	21	7	1
MIR156b	+	451	TCTCTCTCTCTCTCTCTCTCAAATTTGGCTTAGAC	35	1	6
MIR156b	+	452	CTCTCTCTCTCTCTCTCTC	19	11	1
MIR156b	+	452	CTCTCTCTCTCTCTCTCTCAAATTTGGCTTAGAC	34	1	7
MIR156b	+	453	TCTCTCTCTCTCTCTCTCAAATTTGGCTTAGAC	33	1	1
MIR156b	+	454	CTCTCTCTCTCTCTCTCAAATTTGGCTTAGAC	32	1	9
MIR156b	+	455	TCTCTCTCTCTCTCTCAAATTTGGCTTAGAC	31	1	3
MIR156b	+	456	CTCTCTCTCTCTCTCAAATTTGGCTTAGAC	30	1	6
MIR156b	+	457	TCTCTCTCTCTCTCAAATTTGGCTTAGAC	29	1	4
MIR156b	+	458	CTCTCTCTCTCTCAAATTTGGCTTAGAC	28	1	13
MIR156b	+	459	TCTCTCTCTCTCAAATTTGGCTTAGAC	27	1	15
MIR156b	+	460	CTCTCTCTCTCAAATTTGGCTTAGAC	26	1	18
MIR156b	+	461	TCTCTCTCTCAAATTTGGCTTAGAC	25	1	17
MIR156b	+	462	CTCTCTCTCAAATTTGGCTTAGAC	24	1	22
MIR156b	+	463	TCTCTCTCAAATTTGGCTTAGAC	23	1	41
MIR156b	+	464	CTCTCTCAAATTTGGCTTAGAC	22	1	69
MIR156b	+	465	TCTCTCAAATTTGGCTTAGAC	21	1	47
MIR156b	+	466	CTCTCAAATTTGGCTTAGA	19	1	2
MIR156b	+	466	CTCTCAAATTTGGCTTAGAC	20	1	1284
MIR156b	+	467	TCTCAAATTTGGCTTAGA	18	1	2
MIR156b	+	467	TCTCAAATTTGGCTTAGAC	19	1	5315
MIR156b	+	468	CTCAAATTTGGCTTAGAC	18	1	17
MIR156c	+	1091	TGACAGAAGAGAGTGAGC	18	6	6
MIR156c	+	1091	TGACAGAAGAGAGTGAGCACAC	22	5	2
MIR156c	+	1153	TGCTCACTGCTCTATCTGTCAGATTCCGGCTCCGATTCGG	40	1	3
MIR156c	+	1154	GCTCACTGCTCTATCTGTCAGATTCCGGCTCCGATTCGGT	40	1	26
MIR156c	+	1155	CTCACTGCTCTATCTGTCAGATTCCGGCTCCGATTCGGTC	40	1	3
MIR156c	+	1176	TTCCGGCTCCGATTCGGTCCCGGTCACGTTTTCTTCTTCT	40	1	530
MIR156c	+	1177	TCCGGCTCCGATTCGGTCCCGGTCACGTTTTCTTCTTCTA	40	1	16
MIR156c	+	1178	CCGGCTCCGATTCGGTCCCGGTCACGTTTTCTTCTTCTAA	40	1	2
MIR156c	+	1193	TCCCGGTCACGTTTTCTTCTTCTAATTGTGTTCCC	35	1	1
MIR156c	+	1197	GGTCACGTTTTCTTCTTCTAATTGTGTTCCC	31	1	1
MIR156c	+	1198	GTCACGTTTTCTTCTTCTAATTGTGTTCCC	30	1	3
MIR156c	+	1203	GTTTTCTTCTTCTAATTGTGTTCCC	25	1	7
MIR156c	+	1204	TTTTCTTCTTCTAATTGTGTTCC	23	1	1
MIR156c	+	1204	TTTTCTTCTTCTAATTGTGTTCCC	24	1	39
MIR156c	+	1205	TTTCTTCTTCTAATTGTGTTCCC	23	1	53
MIR156c	+	1206	TTCTTCTTCTAATTGTGTTCCC	22	1	107
MIR156c	+	1207	TCTTCTTCTAATTGTGTTCC	20	1	2
MIR156c	+	1207	TCTTCTTCTAATTGTGTTCCC	21	1	352
MIR156c	+	1207	TCTTCTTCTAATTGTGTTCCCATCTCTCACTTTCTCTCTC	40	1	1
MIR156c	+	1208	CTTCTTCTAATTGTGTTCC	19	1	10
MIR156c	+	1208	CTTCTTCTAATTGTGTTC	18	1	1
MIR156c	+	1208	CTTCTTCTAATTGTGTTCCC	20	1	4724
MIR156c	+	1209	TTCTTCTAATTGTGTTCCC	19	1	8372
MIR156c	+	1209	TTCTTCTAATTGTGTTCC	18	1	29
MIR156c	+	1210	TCTTCTAATTGTGTTCCC	18	1	10
MIR156c	+	1269	GTAAATTAAATACGATCTGATAATATCTGTATGAAGATTG	40	1	2
MIR156c	+	3047	TCAAATTGGTCATGCAAAGTCAAAAAGAGATGAATACTGC	40	1	2
MIR156c	+	3292	AGTACCAATAGTTCAATACAAAGTTAGAAATGTTATGTTC	40	1	1
MIR156d	+	367	TTGACAGAAGAGAGTGAGC	19	1	3
MIR156d	+	368	TGACAGAAGAGAGTGAGC	18	6	6
MIR156d	+	368	TGACAGAAGAGAGTGAGCACAC	22	5	2
MIR156d	+	434	TGCTCACTCTCTTTTTGTCATAACTTCTCCTTCATGAATC	40	1	5
MIR156d	+	435	GCTCACTCTCTTTTTGTCATAACTTCTCCTTCATGAATCT	40	1	97
MIR156d	+	436	CTCACTCTCTTTTTGTCATAACTTCTCCTTCATGAATCTT	40	1	1
MIR156d	+	437	TCACTCTCTTTTTGTCATAACTTCTCCTTCATGAATCTTC	40	1	4
MIR156d	+	440	CTCTCTTTTTGTCATAACTTCTCCTTCATGAATCTTCCTT	40	1	1
MIR156d	+	442	CTCTTTTTGTCATAACTTCTCCTTCATGAATCTTCCTTAT	40	1	1
MIR156d	+	443	TCTTTTTGTCATAACTTCTCCTTCATGAATCTTCCTTATT	40	1	1
MIR156d	+	453	ATAACTTCTCCTTCATGAATCTTCCTTATTCCATTGTTCT	40	1	2
MIR156d	+	456	ACTTCTCCTTCATGAATCTTCCTTATTCCATTGTTCTAGT	40	1	3
MIR156d	+	457	CTTCTCCTTCATGAATCTTCCTTATTCCATTGTTCTAGTT	40	1	46
MIR156d	+	458	TTCTCCTTCATGAATCTTCCTTATTCCATTGTTCTAGTTA	40	1	9
MIR156d	+	459	TCTCCTTCATGAATCTTCCTTATTCCATTGTTCTAGTTAT	40	1	51
MIR156d	+	460	CTCCTTCATGAATCTTCCTTATTCCATTGTTCTAGTTATG	40	1	3
MIR156d	+	461	TCCTTCATGAATCTTCCTTATTCCATTGTTCTAGTTATGA	40	1	5
MIR156d	+	464	TTCATGAATCTTCCTTATTCCATTGTTCTAGTTATGATTT	40	1	1
MIR156d	+	473	CTTCCTTATTCCATTGTTCTAGTTATGATTTTGTG	35	1	2
MIR156d	+	476	CCTTATTCCATTGTTCTAGTTATGATTTTGTG	32	1	2
MIR156d	+	478	TTATTCCATTGTTCTAGTTATGATTTTGTG	30	1	1
MIR156d	+	481	TTCCATTGTTCTAGTTATGATTTTGTG	27	1	1
MIR156d	+	485	ATTGTTCTAGTTATGATTTTGTG	23	1	6
MIR156d	+	486	TTGTTCTAGTTATGATTTTGTG	22	1	20
MIR156d	+	487	TGTTCTAGTTATGATTTTGTG	21	1	90
MIR156d	+	488	GTTCTAGTTATGATTTTGTG	20	1	2493
MIR156d	+	489	TTCTAGTTATGATTTTGTG	19	1	2
MIR156d	+	490	TCTAGTTATGATTTTGTG	18	1	2
MIR156e	+	412	TGACAGAAGAGAGTGAGC	18	6	6
MIR156e	+	412	TGACAGAAGAGAGTGAGCACAC	22	5	2
MIR156e	+	541	GTTAATTATAACTAGTAAAA	20	1	5
MIR156e	+	543	TAATTATAACTAGTAAAA	18	1	1
MIR156f	+	123	TGACAGAAGAGAGTGAGC	18	6	6
MIR156f	+	123	TGACAGAAGAGAGTGAGCACAC	22	5	2
MIR156f	+	244	CTCTCTACAGCATTTCATTTAGTT	24	1	1
MIR156f	+	246	CTCTACAGCATTTCATTTAGTT	22	1	4
MIR156f	+	247	TCTACAGCATTTCATTTAGTT	21	1	158
MIR156f	+	248	CTACAGCATTTCATTTAGT	19	1	2
MIR156f	+	248	CTACAGCATTTCATTTAGTT	20	1	1235
MIR156f	+	249	TACAGCATTTCATTTAGT	18	1	7
MIR156f	+	249	TACAGCATTTCATTTAGTT	19	1	1269
MIR156f	+	250	ACAGCATTTCATTTAGTT	18	1	3
MIR156g	+	456	GCTTACTCTCTTCTTGTCTCCTGCTCTCTCCCTCTCTACG	40	1	1
MIR156g	+	485	CCCTCTCTACGTCTATTTATCTATCTATCTATGGACTATG	40	1	1
MIR156g	+	503	ATCTATCTATCTATGGACTATGTGTA	26	1	4
MIR156g	+	504	TCTATCTATCTATGGACTATGTGTA	25	1	2
MIR156g	+	505	CTATCTATCTATGGACTATGTGTA	24	1	7
MIR156g	+	506	TATCTATCTATGGACTATGTGTA	23	1	34
MIR156g	+	507	ATCTATCTATGGACTATGTGT	21	1	1
MIR156g	+	507	ATCTATCTATGGACTATGTGTA	22	1	993
MIR156g	+	508	TCTATCTATGGACTATGTGTA	21	1	328
MIR156g	+	508	TCTATCTATGGACTATGTGT	20	1	1
MIR156g	+	509	CTATCTATGGACTATGTGT	19	1	5
MIR156g	+	509	CTATCTATGGACTATGTGTA	20	1	3106
MIR156g	+	510	TATCTATGGACTATGTGTA	19	1	8040
MIR156g	+	510	TATCTATGGACTATGTGT	18	1	4
MIR156g	+	511	ATCTATGGACTATGTGTA	18	1	22
MIR156h	+	559	GCTCTCTTTCCTTCTGCCACCATCATTGCGCATTGCGCCA	40	1	2
MIR156h	+	561	TCTCTTTCCTTCTGCCACCATCATTGCGCATTGCGCCATG	40	1	1
MIR156h	+	564	CTTTCCTTCTGCCACCATCATTGCGCATTGCGCCATGTTG	40	1	1
MIR156h	+	571	TCTGCCACCATCATTGCGCATTGCGCCATGTTGTGTGATC	40	1	1
MIR156h	+	581	TCATTGCGCATTGCGCCATGTTGTGTGATCGTGTCATGAG	40	1	11
MIR156h	+	608	ATCGTGTCATGAGCGTATGTTAT	23	1	5
MIR156h	+	609	TCGTGTCATGAGCGTATGTTAT	22	1	14
MIR156h	+	610	CGTGTCATGAGCGTATGTTA	20	1	2
MIR156h	+	610	CGTGTCATGAGCGTATGTTAT	21	1	172
MIR156h	+	611	GTGTCATGAGCGTATGTTA	19	1	1
MIR156h	+	611	GTGTCATGAGCGTATGTTAT	20	1	767
MIR156h	+	612	TGTCATGAGCGTATGTTAT	19	1	17
MIR156h	+	613	GTCATGAGCGTATGTTAT	18	1	4
MIR157a	+	575	GCTCTCTAGCCTTCTGTCA	19	2	1
MIR157a	+	627	AGCTTTTGATATAACTATTAT	21	1	1
MIR157a	+	628	GCTTTTGATATAACTATTAT	20	1	9
MIR157a	+	630	TTTTGATATAACTATTAT	18	1	4
MIR157b	+	474	GCTCTCTAGCCTTCTGTCA	19	2	1
MIR157b	+	489	GTCATCACCCGTTATTTGCCATCACCCATCTTTTTCACAT	40	1	1
MIR157b	+	523	TCACATATTTATACACAACTATG	23	1	1
MIR157b	+	524	CACATATTTATACACAACTATG	22	1	5
MIR157b	+	525	ACATATTTATACACAACTATG	21	1	14
MIR157b	+	526	CATATTTATACACAACTATG	20	1	244
MIR157b	+	527	ATATTTATACACAACTATG	19	1	513
MIR157b	+	527	ATATTTATACACAACTAT	18	1	2
MIR157c	+	628	TAAGGATGACATGCAAGTACATACATATATATCATCACAC	40	1	2
MIR157c	+	751	GTGCTCTCTATACTTCTGTCACCACCTTTATCTCTTCTTC	40	1	1
MIR157c	+	794	CTAACCTACATATACGCACATTCACATCTATATA	34	1	1
MIR157c	+	798	CCTACATATACGCACATTCACATCTATATA	30	1	2
MIR157c	+	803	ATATACGCACATTCACATCTATATA	25	1	5
MIR157c	+	804	TATACGCACATTCACATCTATATA	24	1	2
MIR157c	+	805	ATACGCACATTCACATCTATATA	23	1	7
MIR157c	+	806	TACGCACATTCACATCTATATA	22	1	10
MIR157c	+	807	ACGCACATTCACATCTATATA	21	1	138
MIR157c	+	808	CGCACATTCACATCTATATA	20	1	1386
MIR157c	+	808	CGCACATTCACATCTATA	18	1	2
MIR157c	+	808	CGCACATTCACATCTATAT	19	1	4
MIR157c	+	809	GCACATTCACATCTATAT	18	1	4
MIR157c	+	809	GCACATTCACATCTATATA	19	1	6237
MIR157c	+	810	CACATTCACATCTATATA	18	1	56
MIR157c	+	1147	CACTACTAAATTTTCTTTTACTTTCTTTCATTTGGCAGGT	40	1	1
MIR157d	+	796	CATACTCACGTATCTTACTT	20	1	10
MIR157d	+	797	ATACTCACGTATCTTACTT	19	1	16
MIR157d	+	797	ATACTCACGTATCTTACT	18	1	1
MIR158a	+	436	AGATTAGAGGGCTAGCGACTGCAGAAGAAGAGTAACACGT	40	1	2
MIR158a	+	442	GAGGGCTAGCGACTGCAGAAGAAGAGTAACACGTCATCTC	40	1	1
MIR158a	+	443	AGGGCTAGCGACTGCAGAAGAAGAGTAACACGTCATCTCT	40	1	1
MIR158a	+	444	GGGCTAGCGACTGCAGAAGAAGAGTAACACGTCATCTCTG	40	1	1
MIR158a	+	449	AGCGACTGCAGAAGAAGAGTAACACGTCATCTCTGTGCTT	40	1	1
MIR158a	+	472	ACGTCATCTCTGTGCTTCTTTGTCTACAATTTTGGAAAAA	40	1	1
MIR158a	+	483	GTGCTTCTTTGTCTACAATTTTGGAAAAAGTGATGACGCC	40	1	2
MIR158a	+	487	TTCTTTGTCTACAATTTTGGAAAAAGTGATGACGCCATTG	40	1	8
MIR158a	+	488	TCTTTGTCTACAATTTTGGAAAAAGTGATGACGCCATTGC	40	1	1
MIR158a	+	489	CTTTGTCTACAATTTTGGAAAAAGTGATGACGCCATTGCT	40	1	5
MIR158a	+	490	TTTGTCTACAATTTTGGAAAAAGTGATGACGCCATTGCTC	40	1	1
MIR158a	+	497	ACAATTTTGGAAAAAGTGATGACGCCATTGCTCTTTCCCA	40	1	1
MIR158a	+	503	TTGGAAAAAGTGATGACGCCATTGCTCTTTCCCAAATGTA	40	1	1
MIR158a	+	512	GTGATGACGCCATTGCTCTTTCCCAAATGTAGACAAAGCA	40	1	3
MIR158a	+	532	TCCCAAATGTAGACAAAGCAATACCGTGATGATGTCGTGG	40	1	1
MIR158a	+	534	CCAAATGTAGACAAAGCAATACCGTGATGATGTCGTGGAG	40	1	4
MIR158a	+	542	AGACAAAGCAATACCGTGATGATGTCGTGGAGATTTTGTT	40	1	7
MIR158a	+	544	ACAAAGCAATACCGTGATGATGTCGTGGAGATTTTGTTGA	40	1	1
MIR158a	+	547	AAGCAATACCGTGATGATGTCGTGGAGATTTTGTTGAGAT	40	1	2
MIR158a	+	549	GCAATACCGTGATGATGTCGTGGAGATTTTGTTGAGATGC	40	1	5
MIR158a	+	550	CAATACCGTGATGATGTCGTGGAGATTTTGTTGAGATGCT	40	1	3
MIR158a	+	552	ATACCGTGATGATGTCGTGGAGATTTTGTTGAGATGCTAC	40	1	347
MIR158a	+	553	TACCGTGATGATGTCGTGGAGATTTTGTTGAGATGCTACG	40	1	9
MIR158a	+	554	ACCGTGATGATGTCGTGGAGATTTTGTTGAGATGCTACGA	40	1	1
MIR158a	+	558	TGATGATGTCGTGGAGATTTTGTTGAGATGCTACGAGCGT	40	1	2
MIR158a	+	573	GATTTTGTTGAGATGCTACGAGCGTGTAAAT	31	1	2
MIR158a	+	574	ATTTTGTTGAGATGCTACGAGCGTGTAAAT	30	1	1
MIR158a	+	577	TTGTTGAGATGCTACGAGCGTGTAAAT	27	1	1
MIR158a	+	580	TTGAGATGCTACGAGCGTGTAAAT	24	1	5
MIR158a	+	581	TGAGATGCTACGAGCGTGTAAAT	23	1	2
MIR158a	+	582	GAGATGCTACGAGCGTGTAAAT	22	1	28
MIR158a	+	583	AGATGCTACGAGCGTGTAAAT	21	1	126
MIR158a	+	584	GATGCTACGAGCGTGTAAA	19	1	1
MIR158a	+	584	GATGCTACGAGCGTGTAAAT	20	1	1035
MIR158a	+	585	ATGCTACGAGCGTGTAAAT	19	1	15
MIR158b	+	392	ATACCGTGATGACGTTATATGGAGATTTTGTTGATGTTAC	40	1	3
MIR158b	+	423	TGATGTTACGAACGTGTGTATATG	24	1	2
MIR158b	+	425	ATGTTACGAACGTGTGTATATG	22	1	11
MIR158b	+	426	TGTTACGAACGTGTGTATATG	21	1	24
MIR158b	+	427	GTTACGAACGTGTGTATATG	20	1	258
MIR158b	+	428	TTACGAACGTGTGTATATG	19	1	6
MIR158b	+	429	TACGAACGTGTGTATATG	18	1	21
MIR159a	+	708	CTACTCAACAATTATTTATT	20	1	12
MIR159a	+	709	TACTCAACAATTATTTATT	19	1	19
MIR159b	+	513	ATAAGCCTTATCAAATTCAATATAATTGATGATAAGGTTT	40	1	1
MIR159b	+	562	ATGCCATATCTCAGGAGCTTTCACTTACCCCTTTAATGGC	40	1	2
MIR159b	+	573	CAGGAGCTTTCACTTACCCCTTTAATGGCTTCACTCTTCT	40	1	1
MIR159b	+	612	TTTGGATTGAAGGGAGCTCTTCATCTCTCCATCCCTATCT	40	1	3
MIR159b	+	621	AAGGGAGCTCTTCATCTCTCCATCCCTATCTCTCTCTCTC	40	1	1
MIR159b	+	632	TCATCTCTCCATCCCTATCTCTCTCTCTCTCTATCTTTAG	40	1	3
MIR159b	+	633	CATCTCTCCATCCCTATCTCTCTCTCTCTCTATCTTTAGT	40	1	25
MIR159b	+	634	ATCTCTCCATCCCTATCTCTCTCTCTCTCTATCTTTAGTT	40	1	2
MIR159b	+	655	TCTCTCTCTATCTTTAGTTCTTTTAAGAATG	31	1	5
MIR159b	+	659	TCTCTATCTTTAGTTCTTTTAAGAATG	27	1	1
MIR159b	+	664	ATCTTTAGTTCTTTTAAGAATG	22	1	1
MIR159b	+	666	CTTTAGTTCTTTTAAGAATG	20	1	32
MIR159b	+	666	CTTTAGTTCTTTTAAGAATGACTTTTCATTTTTTGTGTTG	40	1	1
MIR159b	+	667	TTTAGTTCTTTTAAGAATG	19	1	51
MIR159b	+	674	CTTTTAAGAATGACTTTTCATTTTTTGTGTTGTCTGTTGC	40	1	2
MIR159c	+	676	TCAAAACTTGGTTTCGATCTAACTTG	26	1	2
MIR159c	+	678	AAAACTTGGTTTCGATCTAACTTG	24	1	13
MIR159c	+	679	AAACTTGGTTTCGATCTAACTTG	23	1	23
MIR159c	+	680	AACTTGGTTTCGATCTAACTTG	22	1	82
MIR159c	+	681	ACTTGGTTTCGATCTAACTTG	21	1	304
MIR159c	+	682	CTTGGTTTCGATCTAACTT	19	1	4
MIR159c	+	682	CTTGGTTTCGATCTAACT	18	1	2
MIR159c	+	682	CTTGGTTTCGATCTAACTTG	20	1	3691
MIR159c	+	683	TTGGTTTCGATCTAACTT	18	1	15
MIR159c	+	683	TTGGTTTCGATCTAACTTG	19	1	14718
MIR159c	+	684	TGGTTTCGATCTAACTTG	18	1	43
MIR160a	+	54	ACCCTTAATTGTTTTATATAAACCATTTCTCCTCCTCTCT	40	1	1
MIR160a	+	99	ACCTTCAATCTCTCTCGATCTCTCTCTGGATCCCCAATCT	40	1	1
MIR160a	+	502	TATGCTGAGCCCATCGAGTATCGATGACCTCCGTGGATGG	40	1	1
MIR160a	+	522	TCGATGACCTCCGTGGATGGCGTATGAGGAGCCATGCATA	40	1	1
MIR160a	+	541	GCGTATGAGGAGCCATGCATATCCTCATACATATATAATT	40	1	99
MIR160a	+	548	AGGAGCCATGCATATCCTCATACATATATAATTATGTTTT	40	1	1
MIR160a	+	549	GGAGCCATGCATATCCTCATACATATATAATTATGTTTTG	40	1	1
MIR160a	+	554	CATGCATATCCTCATACATATATAATTATGTTTTGGTACC	40	1	1
MIR160a	+	562	TCCTCATACATATATAATTATGTTTTGGTACCAATTGAAT	40	1	227
MIR160a	+	563	CCTCATACATATATAATTATGTTTTGGTACCAATTGAATT	40	1	8
MIR160a	+	566	CATACATATATAATTATGTTTTGGTACCAATTGAATTGTG	40	1	1
MIR160a	+	570	CATATATAATTATGTTTTGGTACCAATTGAATTGTGTTGA	40	1	1
MIR160a	+	584	TTTTGGTACCAATTGAATTGTGTTGATG	28	1	1
MIR160a	+	589	GTACCAATTGAATTGTGTTGATG	23	1	2
MIR160a	+	590	TACCAATTGAATTGTGTTGATG	22	1	136
MIR160a	+	591	ACCAATTGAATTGTGTTGATG	21	1	254
MIR160a	+	592	CCAATTGAATTGTGTTGATG	20	1	1131
MIR160a	+	592	CCAATTGAATTGTGTTGAT	19	1	1
MIR160a	+	593	CAATTGAATTGTGTTGAT	18	1	4
MIR160a	+	593	CAATTGAATTGTGTTGATG	19	1	2799
MIR160a	+	594	AATTGAATTGTGTTGATG	18	1	11
MIR160b	+	546	GCGTACAGAGTAGTCAAGCATGACCAAAGCTTATCATAAT	40	1	2
MIR160b	+	591	CATTATATGTATATGAGTACTTTGTCTC	28	1	1
MIR160b	+	594	TATATGTATATGAGTACTTTGTCTC	25	1	2
MIR160b	+	595	ATATGTATATGAGTACTTTGTCTC	24	1	2
MIR160b	+	596	TATGTATATGAGTACTTTGTCTC	23	1	2
MIR160b	+	597	ATGTATATGAGTACTTTGTCTC	22	1	14
MIR160b	+	598	TGTATATGAGTACTTTGTCTC	21	1	20
MIR160b	+	599	GTATATGAGTACTTTGTCTC	20	1	179
MIR160b	+	600	TATATGAGTACTTTGTCTC	19	1	4
MIR160b	+	601	ATATGAGTACTTTGTCTC	18	1	3
MIR160c	+	683	GCGTACAAGGAGTCAAGCATGACCAGAAGCATATGGTAAC	40	1	1
MIR160c	+	698	AGCATGACCAGAAGCATATGGTAACTCAATTGCATCTACA	40	1	2
MIR160c	+	704	ACCAGAAGCATATGGTAACTCAATTGCATCTACAACTAAA	40	1	1
MIR160c	+	735	ACAACTAAATATGAAATATCT	21	1	2
MIR160c	+	736	CAACTAAATATGAAATATCT	20	1	15
MIR160c	+	737	AACTAAATATGAAATATCT	19	1	74
MIR161	+	421	TCAATGCATTGAAAGTGACTACATCGGGGTTCCGATTTTT	40	1	1
MIR161	+	508	GTCACTTTCACTGCATTAATCAATGCATTTGTAAAAAGAG	40	1	2
MIR161	+	509	TCACTTTCACTGCATTAATCAATGCATTTGTAAAAAGAGG	40	1	6
MIR161	+	511	ACTTTCACTGCATTAATCAATGCATTTGTAAAAAGAGGGA	40	1	2
MIR161	+	512	CTTTCACTGCATTAATCAATGCATTTGTAAAAAGAGGGAA	40	1	3
MIR161	+	514	TTCACTGCATTAATCAATGCATTTGTAAAAAGAGGGAAAA	40	1	1
MIR161	+	515	TCACTGCATTAATCAATGCATTTGTAAAAAGAGGGAAAAG	40	1	4
MIR161	+	517	ACTGCATTAATCAATGCATTTGTAAAAAGAGGGAAAAGCA	40	1	3
MIR161	+	518	CTGCATTAATCAATGCATTTGTAAAAAGAGGGAAAAGCAT	40	1	3
MIR161	+	520	GCATTAATCAATGCATTTGTAAAAAGAGGGAAAAGCATTG	40	1	365
MIR161	+	521	CATTAATCAATGCATTTGTAAAAAGAGGGAAAAGCATTGA	40	1	150
MIR161	+	522	ATTAATCAATGCATTTGTAAAAAGAGGGAAAAGCATTGAA	40	1	10
MIR161	+	523	TTAATCAATGCATTTGTAAAAAGAGGGAAAAGCATTGAAA	40	1	3
MIR161	+	524	TAATCAATGCATTTGTAAAAAGAGGGAAAAGCATTGAAAT	40	1	7
MIR161	+	525	AATCAATGCATTTGTAAAAAGAGGGAAAAGCATTGAAATT	40	1	12
MIR161	+	529	AATGCATTTGTAAAAAGAGGGAAAAGCATTGAAATTGTGT	40	1	81
MIR161	+	530	ATGCATTTGTAAAAAGAGGGAAAAGCATTGAAATTGTGTA	40	1	2
MIR161	+	531	TGCATTTGTAAAAAGAGGGAAAAGCATTGAAATTGTGTAA	40	1	2
MIR161	+	532	GCATTTGTAAAAAGAGGGAAAAGCATTGAAATTGTGTAAG	40	1	3
MIR161	+	534	ATTTGTAAAAAGAGGGAAAAGCATTGAAATTGTGTAAGGA	40	1	1
MIR161	+	545	GAGGGAAAAGCATTGAAATTGTGTAAGGAGATGG	34	1	1
MIR161	+	549	GAAAAGCATTGAAATTGTGTAAGGAGATGG	30	1	1
MIR161	+	554	GCATTGAAATTGTGTAAGGAGATGG	25	1	1
MIR161	+	555	CATTGAAATTGTGTAAGGAGATGG	24	1	4
MIR161	+	556	ATTGAAATTGTGTAAGGAGATGG	23	1	37
MIR161	+	557	TTGAAATTGTGTAAGGAGATGG	22	1	121
MIR161	+	558	TGAAATTGTGTAAGGAGATGG	21	1	301
MIR161	+	559	GAAATTGTGTAAGGAGATGG	20	1	1620
MIR161	+	560	AAATTGTGTAAGGAGATGG	19	1	22
MIR161	+	561	AATTGTGTAAGGAGATGG	18	1	4
MIR162a	+	479	GTTAAAACTTTCATCTCTCTGTTTCCTTTTTCTTTCTTTG	40	1	1
MIR162a	+	844	TCGATAAACCTCTGCATCCA	20	2	1
MIR162a	+	881	CTTTCTTATTGACTTGAATCTTTTTGTTTATTGGT	35	1	1
MIR162a	+	892	ACTTGAATCTTTTTGTTTATTGGT	24	1	1
MIR162a	+	893	CTTGAATCTTTTTGTTTATTGGT	23	1	3
MIR162a	+	894	TTGAATCTTTTTGTTTATTGGT	22	1	6
MIR162a	+	895	TGAATCTTTTTGTTTATTGGT	21	1	10
MIR162a	+	896	GAATCTTTTTGTTTATTGGT	20	1	46
MIR162a	+	897	AATCTTTTTGTTTATTGGT	19	1	1
MIR162a	+	898	ATCTTTTTGTTTATTGGT	18	1	1
MIR162a	+	1629	CCAAAAATATGTAAACTCTGCCATGCCTTGAGCTGCTTTT	40	1	3
MIR162a	+	1720	TATGATGAAACCGAAAATTGTTAATTGCTAACGCAAACAC	40	1	2
MIR162a	+	1743	ATTGCTAACGCAAACACTGATCTCCATCCCCATGATATTC	40	1	1
MIR162b	+	570	TCGATAAACCTCTGCATCCA	20	2	1
MIR162b	+	570	TCGATAAACCTCTGCATCCAGCGCTGCTTGCTCTTCATGA	40	1	4
MIR162b	+	588	CAGCGCTGCTTGCTCTTCATGACTTTTGTTTAATTGATAT	40	1	1
MIR162b	+	591	CGCTGCTTGCTCTTCATGACTTTTGTTTAATTGATATCTA	40	1	6
MIR162b	+	619	AATTGATATCTATTTGAGTATTGC	24	1	3
MIR162b	+	620	ATTGATATCTATTTGAGTATTGC	23	1	15
MIR162b	+	621	TTGATATCTATTTGAGTATTGC	22	1	9
MIR162b	+	622	TGATATCTATTTGAGTATTGC	21	1	24
MIR162b	+	623	GATATCTATTTGAGTATTG	19	1	1
MIR162b	+	623	GATATCTATTTGAGTATTGC	20	1	310
MIR162b	+	624	ATATCTATTTGAGTATTGC	19	1	6
MIR163	+	419	ACAGTTCTCATCAAATATTTGAAAGTATCAAACAAAAAAA	40	1	2
MIR163	+	653	ACTAAAGTGCTGGAGTTCCCGGTTCCTGAGAGTGAGTCCA	40	1	1
MIR163	+	676	TCCTGAGAGTGAGTCCATATCAAAATGCGCATTCGTTATC	40	1	1
MIR163	+	756	AATGGAACGCGTAATTGATGACTCCTACGTGGAACCTCTT	40	1	2
MIR163	+	788	AACCTCTTCTTAGGAAGAGCACGGTCGAAGAAGTAACTGC	40	1	1
MIR163	+	791	CTCTTCTTAGGAAGAGCACGGTCGAAGAAGTAACTGCGCA	40	1	2
MIR163	+	804	GAGCACGGTCGAAGAAGTAACTGCGCAGTGCTTAAATCGT	40	1	1
MIR163	+	806	GCACGGTCGAAGAAGTAACTGCGCAGTGCTTAAA	34	1	1
MIR163	+	820	GTAACTGCGCAGTGCTTAAATCGTAGATGCTAAAG	35	1	1
MIR163	+	822	AACTGCGCAGTGCTTAAATCGTAGATGCTAAAGTCGTTGA	40	1	2
MIR163	+	837	AAATCGTAGATGCTAAAGTCGTTGAAGAGGACTTGGAACT	40	1	3
MIR163	+	838	AATCGTAGATGCTAAAGTCGTTGAAGAGGACTTGGAACTT	40	1	1
MIR163	+	840	TCGTAGATGCTAAAGTCGTTGAAGAGGACTTGGAACTTCG	40	1	2
MIR163	+	858	TTGAAGAGGACTTGGAACTTCGATATTATCCCCCGTGTTT	40	1	1
MIR163	+	876	TTCGATATTATCCCCCGTGTTTTGTCCAGTTTCTCTATAG	40	1	1
MIR163	+	881	TATTATCCCCCGTGTTTTGTCCAGTTTCTCTATAGGTTGT	40	1	6
MIR163	+	884	TATCCCCCGTGTTTTGTCCAGTTTCTCTATAGGTTGTGCC	40	1	1
MIR163	+	886	TCCCCCGTGTTTTGTCCAGTTTCTCTATAGGTTGTGCCTG	40	1	1
MIR163	+	888	CCCCGTGTTTTGTCCAGTTTCTCTATAGGTTGTGCCTGAA	40	1	1
MIR163	+	889	CCCGTGTTTTGTCCAGTTTCTCTATAGGTTGTGCCTGAAA	40	1	1
MIR163	+	892	GTGTTTTGTCCAGTTTCTCTATAGGTTGTGCCTGAAAATA	40	1	2
MIR163	+	893	TGTTTTGTCCAGTTTCTCTATAGGTTGTGCCTGAAAATAT	40	1	1
MIR163	+	895	TTTTGTCCAGTTTCTCTATAGGTTGTGCCTGAAAATATGG	40	1	1
MIR163	+	900	TCCAGTTTCTCTATAGGTTGTGCCTGAAAATATGG	35	1	2
MIR163	+	903	AGTTTCTCTATAGGTTGTGCCTGAAAATATGG	32	1	255
MIR163	+	904	GTTTCTCTATAGGTTGTGCCTGAAAATATGG	31	1	10
MIR163	+	905	TTTCTCTATAGGTTGTGCCTGAAAATATGG	30	1	8
MIR163	+	907	TCTCTATAGGTTGTGCCTGAAAATATGG	28	1	2
MIR163	+	908	CTCTATAGGTTGTGCCTGAAAATATGG	27	1	1
MIR163	+	909	TCTATAGGTTGTGCCTGAAAATATGG	26	1	1
MIR163	+	910	CTATAGGTTGTGCCTGAAAATATGG	25	1	5
MIR163	+	911	TATAGGTTGTGCCTGAAAATATGG	24	1	1
MIR163	+	912	ATAGGTTGTGCCTGAAAATATGG	23	1	9
MIR163	+	913	TAGGTTGTGCCTGAAAATATG	21	1	1
MIR163	+	913	TAGGTTGTGCCTGAAAATATGG	22	1	28
MIR163	+	914	AGGTTGTGCCTGAAAATATGG	21	1	153
MIR163	+	915	GGTTGTGCCTGAAAATATGG	20	1	810
MIR163	+	915	GGTTGTGCCTGAAAATATG	19	1	2
MIR163	+	916	GTTGTGCCTGAAAATATGG	19	1	18
MIR163	+	917	TTGTGCCTGAAAATATGG	18	1	1
MIR164a	+	576	TATCCCTTAAACCTTATTGATAAT	24	1	13
MIR164a	+	577	ATCCCTTAAACCTTATTGATAAT	23	1	10
MIR164a	+	578	TCCCTTAAACCTTATTGATAAT	22	1	4
MIR164a	+	579	CCCTTAAACCTTATTGATAAT	21	1	21
MIR164a	+	580	CCTTAAACCTTATTGATAAT	20	1	104
MIR164a	+	581	CTTAAACCTTATTGATAAT	19	1	831
MIR164a	+	581	CTTAAACCTTATTGATAA	18	1	2
MIR164a	+	582	TTAAACCTTATTGATAAT	18	1	6
MIR164b	+	403	CTCTCTTTCTCTCTCTCTCTCTCTCTCATCCCGGCCCAGT	40	1	1
MIR164b	+	411	CTCTCTCTCTCTCTCTCTC	19	11	1
MIR164b	+	431	TCCCGGCCCAGTTATGTGGTCGGAGAGAATGATGAAGGTG	40	1	1
MIR164b	+	485	TGGAGAAGCAGGGCACGTGCATTACTAGCTCATATATACA	40	1	1
MIR164b	+	486	GGAGAAGCAGGGCACGTGCATTACTAGCTCATATATACAC	40	1	1
MIR164b	+	492	GCAGGGCACGTGCATTACTAGCTCATATATACACTCTCAC	40	1	1
MIR164b	+	500	CGTGCATTACTAGCTCATATATACACTCTCACCACAAATG	40	1	1
MIR164b	+	506	TTACTAGCTCATATATACACTCTCACCACAAATGCGTGTA	40	1	1
MIR164b	+	524	ACTCTCACCACAAATGCGTGTATATATGCGGAATTTTGTG	40	1	1
MIR164b	+	536	AATGCGTGTATATATGCGGAATTTTGTGATATAGATGTGT	40	1	1
MIR164b	+	539	GCGTGTATATATGCGGAATTTTGTGATATAGATGTGTGTG	40	1	2
MIR164b	+	540	CGTGTATATATGCGGAATTTTGTGATATAGATGTGTGTGT	40	1	6
MIR164b	+	546	TATATGCGGAATTTTGTGATATAGATGTGTGTGTGTGTTG	40	1	1
MIR164b	+	547	ATATGCGGAATTTTGTGATATAGATGTGTGTGTGTGTTGA	40	1	3
MIR164b	+	549	ATGCGGAATTTTGTGATATAGATGTGTGTGTGTGTTGAGT	40	1	5
MIR164b	+	571	TGTGTGTGTGTGTTGAGTGTGATGATATGGATGAGTTAGT	40	1	1
MIR164b	+	574	GTGTGTGTGTTGAGTGTGATGATATGGATGAGTTAGTTCT	40	1	9
MIR164b	+	576	GTGTGTGTTGAGTGTGATGATATGGATGAGTTAGTTCTTC	40	1	14
MIR164b	+	578	GTGTGTTGAGTGTGATGATATGGATGAGTTAGTTCTTCAT	40	1	2
MIR164b	+	581	TGTTGAGTGTGATGATATGGATGAGTTAGTTCTTCATGTG	40	1	6
MIR164b	+	583	TTGAGTGTGATGATATGGATGAGTTAGTTCT	31	1	5
MIR164b	+	584	TGAGTGTGATGATATGGATGAGTTAGTTCT	30	1	1
MIR164b	+	616	ATGTGCCCATCTTCACCATCATGACCACTCCACCTTGGTG	40	1	7
MIR164b	+	617	TGTGCCCATCTTCACCATCATGACCACTCCACCTTGGTGA	40	1	21
MIR164b	+	618	GTGCCCATCTTCACCATCATGACCACTCCACCTTGGTGAC	40	1	3
MIR164b	+	619	TGCCCATCTTCACCATCATGACCACTCCACCTTGGTGACG	40	1	103
MIR164b	+	620	GCCCATCTTCACCATCATGACCACTCCACCTTGGTGACGA	40	1	14
MIR164b	+	621	CCCATCTTCACCATCATGACCACTCCACCTTGGTGACGAT	40	1	133
MIR164b	+	622	CCATCTTCACCATCATGACCACTCCACCTTGGTGACGATG	40	1	10
MIR164b	+	623	CATCTTCACCATCATGACCACTCCACCTTGGTGACGATGA	40	1	2
MIR164b	+	624	ATCTTCACCATCATGACCACTCCACCTTGGTGACGATGAC	40	1	1
MIR164b	+	627	TTCACCATCATGACCACTCCACCTTGGTGACGATGACGAC	40	1	2
MIR164b	+	628	TCACCATCATGACCACTCCACCTTGGTGACGATGACGACG	40	1	11
MIR164b	+	629	CACCATCATGACCACTCCACCTTGGTGACGATGACGACGA	40	1	13
MIR164b	+	630	ACCATCATGACCACTCCACCTTGGTGACGATGACGACGAG	40	1	3
MIR164b	+	631	CCATCATGACCACTCCACCTTGGTGACGATGACGACGAGG	40	1	2
MIR164b	+	634	TCATGACCACTCCACCTTGGTGACGATGACGACGAGGGTT	40	1	2
MIR164b	+	635	CATGACCACTCCACCTTGGTGACGATGACGACGAGGGTTC	40	1	33
MIR164b	+	636	ATGACCACTCCACCTTGGTGACGATGACGACGAGGGTTCA	40	1	1460
MIR164b	+	637	TGACCACTCCACCTTGGTGACGATGACGACGAGGGTTCAA	40	1	50
MIR164b	+	638	GACCACTCCACCTTGGTGACGATGACGACGAGGGTTCAAG	40	1	6
MIR164b	+	639	ACCACTCCACCTTGGTGACGATGACGACGAGGGTTCAAGT	40	1	3
MIR164b	+	640	CCACTCCACCTTGGTGACGATGACGACGAGGGTTCAAGTG	40	1	1
MIR164b	+	641	CACTCCACCTTGGTGACGATGACGACGAGGGTTCAAGTGT	40	1	6
MIR164b	+	642	ACTCCACCTTGGTGACGATGACGACGAGGGTTCAAGTGTT	40	1	1
MIR164b	+	643	CTCCACCTTGGTGACGATGACGACGAGGGTTCAAGTGTTA	40	1	11
MIR164b	+	644	TCCACCTTGGTGACGATGACGACGAGGGTTCAAGTGTTAC	40	1	2
MIR164b	+	645	CCACCTTGGTGACGATGACGACGAGGGTTCAAGTGTTACG	40	1	2
MIR164b	+	646	CACCTTGGTGACGATGACGACGAGGGTTCAAGTGTTACGC	40	1	2
MIR164b	+	652	GGTGACGATGACGACGAGGGTTCAAGTGTTACGC	34	1	1
MIR164b	+	653	GTGACGATGACGACGAGGGTTCAAGTGTTACGC	33	1	1
MIR164b	+	659	ATGACGACGAGGGTTCAAGTGTTACGC	27	1	2
MIR164b	+	660	TGACGACGAGGGTTCAAGTGTTACGC	26	1	2
MIR164b	+	661	GACGACGAGGGTTCAAGTGTTACGC	25	1	2
MIR164b	+	662	ACGACGAGGGTTCAAGTGTTACGC	24	1	11
MIR164b	+	663	CGACGAGGGTTCAAGTGTTACGC	23	1	180
MIR164b	+	663	CGACGAGGGTTCAAGTGTTACG	22	1	1
MIR164b	+	664	GACGAGGGTTCAAGTGTTACGC	22	1	412
MIR164b	+	664	GACGAGGGTTCAAGTGTTACG	21	1	3
MIR164b	+	665	ACGAGGGTTCAAGTGTTACGC	21	1	2232
MIR164b	+	665	ACGAGGGTTCAAGTGTTACG	20	1	5
MIR164b	+	666	CGAGGGTTCAAGTGTTACGC	20	1	14358
MIR164b	+	666	CGAGGGTTCAAGTGTTACG	19	1	55
MIR164b	+	667	GAGGGTTCAAGTGTTACG	18	1	1216
MIR164b	+	667	GAGGGTTCAAGTGTTACGC	19	1	334996
MIR164b	+	668	AGGGTTCAAGTGTTACGC	18	1	1028
MIR164c	+	567	ACGTGTCTCTCCCCCTCCCCGAGGATGCAATCGTCAATGG	40	1	9
MIR164c	+	595	AATCGTCAATGGATAGAACAGAA	23	1	1
MIR164c	+	596	ATCGTCAATGGATAGAACAGAA	22	1	12
MIR164c	+	597	TCGTCAATGGATAGAACAGAA	21	1	20
MIR164c	+	598	CGTCAATGGATAGAACAGAA	20	1	615
MIR164c	+	598	CGTCAATGGATAGAACAGA	19	1	3
MIR164c	+	599	GTCAATGGATAGAACAGA	18	1	12
MIR164c	+	599	GTCAATGGATAGAACAGAA	19	1	4297
MIR165a	+	969	CCAACATGTTATTGCCTCTGATCACCATTTATTGTTACAT	40	1	9
MIR165a	+	970	CAACATGTTATTGCCTCTGATCACCATTTATTGTTACATT	40	1	1
MIR165a	+	971	AACATGTTATTGCCTCTGATCACCATTTATTGTTACATTT	40	1	1
MIR165a	+	999	ATTGTTACATTTTTTTTTGTTAATT	25	1	1
MIR165a	+	1000	TTGTTACATTTTTTTTTGTTAATT	24	1	1
MIR165a	+	1001	TGTTACATTTTTTTTTGTTAATT	23	1	2
MIR165a	+	1002	GTTACATTTTTTTTTGTTAAT	21	1	2
MIR165a	+	1002	GTTACATTTTTTTTTGTTAATT	22	1	43
MIR165b	+	845	TCAACATGTTAATTGCCTTCAATCACTCTGGAGAAACTAC	40	1	24
MIR165b	+	867	TCACTCTGGAGAAACTACAAAACCTTGA	28	1	1
MIR165b	+	871	TCTGGAGAAACTACAAAACCTTGA	24	1	1
MIR165b	+	873	TGGAGAAACTACAAAACCTTGA	22	1	1
MIR165b	+	874	GGAGAAACTACAAAACCTTGA	21	1	60
MIR165b	+	875	GAGAAACTACAAAACCTTGA	20	1	377
MIR165b	+	876	AGAAACTACAAAACCTTGA	19	1	3
MIR165b	+	877	GAAACTACAAAACCTTGA	18	1	2
MIR166a	+	458	GCTCTATTCATGTTGGATCTCTTTCGATCTAACAA	35	1	1
MIR166a	+	540	TCGGACCAGGCTTCATTCC	19	7	1
MIR166a	+	544	ACCAGGCTTCATTCCCCCCAATTGTTGCTCCCTGTTTACT	40	1	1
MIR166a	+	560	CCCAATTGTTGCTCCCTGTTTACTCCATATTTCTTCCTTC	40	1	8
MIR166a	+	561	CCAATTGTTGCTCCCTGTTTACTCCATATTTCTTCCTTCT	40	1	116
MIR166a	+	563	AATTGTTGCTCCCTGTTTACTCCATATTTCTTCCTTCTTT	40	1	1
MIR166a	+	590	TTCTTCCTTCTTTTCAAATTAGGGT	25	1	3
MIR166a	+	591	TCTTCCTTCTTTTCAAATTAGGGT	24	1	1
MIR166a	+	592	CTTCCTTCTTTTCAAATTAGGGT	23	1	20
MIR166a	+	593	TTCCTTCTTTTCAAATTAGGGT	22	1	14
MIR166a	+	593	TTCCTTCTTTTCAAATTAGGG	21	1	1
MIR166a	+	594	TCCTTCTTTTCAAATTAGGGT	21	1	33
MIR166a	+	595	CCTTCTTTTCAAATTAGGGT	20	1	464
MIR166a	+	595	CCTTCTTTTCAAATTAGGG	19	1	3
MIR166a	+	596	CTTCTTTTCAAATTAGGG	18	1	9
MIR166a	+	596	CTTCTTTTCAAATTAGGGT	19	1	3289
MIR166a	+	597	TTCTTTTCAAATTAGGGT	18	1	18
MIR166a	+	940	GATGATGACGATGATAGTTTTTATTCAGATCTGTTTGTTT	40	1	2
MIR166a	+	962	ATTCAGATCTGTTTGTTTCTTAGCACACTAGATCTATATT	40	1	1
MIR166a	+	963	TTCAGATCTGTTTGTTTCTTAGCACACTAGATCTATATTT	40	1	3
MIR166a	+	965	CAGATCTGTTTGTTTCTTAGCACACTAGATCTATATTTGT	40	1	5
MIR166a	+	967	GATCTGTTTGTTTCTTAGCACACTAGATCTATATTTGTGA	40	1	11
MIR166a	+	969	TCTGTTTGTTTCTTAGCACACTAGATCTATATTTGTGACA	40	1	1
MIR166a	+	973	TTTGTTTCTTAGCACACTAGATCTATATTTGTGACACAAA	40	1	1
MIR166b	+	229	TCTCTCTCTCTCTCTCTCTCTC	22	6	1
MIR166b	+	230	CTCTCTCTCTCTCTCTCTC	19	11	1
MIR166b	+	230	CTCTCTCTCTCTCTCTCTCTC	21	7	1
MIR166b	+	231	TCTCTCTCTCTCTCTCTCTCTC	22	6	1
MIR166b	+	232	CTCTCTCTCTCTCTCTCTC	19	11	1
MIR166b	+	232	CTCTCTCTCTCTCTCTCTCTC	21	7	1
MIR166b	+	233	TCTCTCTCTCTCTCTCTCTCTC	22	6	1
MIR166b	+	234	CTCTCTCTCTCTCTCTCTC	19	11	1
MIR166b	+	234	CTCTCTCTCTCTCTCTCTCTC	21	7	1
MIR166b	+	235	TCTCTCTCTCTCTCTCTCTCTC	22	6	1
MIR166b	+	236	CTCTCTCTCTCTCTCTCTC	19	11	1
MIR166b	+	236	CTCTCTCTCTCTCTCTCTCTC	21	7	1
MIR166b	+	238	CTCTCTCTCTCTCTCTCTC	19	11	1
MIR166b	+	432	ACTCTTATTCTAATACAATCTCATTTGAATACATTCAGAT	40	1	10
MIR166b	+	433	CTCTTATTCTAATACAATCTCATTTGAATACATTCAGATC	40	1	7
MIR166b	+	434	TCTTATTCTAATACAATCTCATTTGAATACATTCAGATCT	40	1	1
MIR166b	+	435	CTTATTCTAATACAATCTCATTTGAATACATTCAGATCTG	40	1	2
MIR166b	+	436	TTATTCTAATACAATCTCATTTGAATACATTCAGATCTGA	40	1	1
MIR166b	+	438	ATTCTAATACAATCTCATTTGAATACATTCAGATCTGATG	40	1	2
MIR166b	+	440	TCTAATACAATCTCATTTGAATACATTCAGATCTGATGAT	40	1	1
MIR166b	+	500	TCGGACCAGGCTTCATTCC	19	7	1
MIR166b	+	520	CCCAATTATCACTCCCTCACAATCCGAATTAACGAAGAAG	40	1	16
MIR166b	+	521	CCAATTATCACTCCCTCACAATCCGAATTAACGAAGAAGA	40	1	138
MIR166b	+	522	CAATTATCACTCCCTCACAATCCGAATTAACGAAGAAGAT	40	1	3
MIR166b	+	547	ATTAACGAAGAAGATTTGTCCATTT	25	1	2
MIR166b	+	549	TAACGAAGAAGATTTGTCCATTT	23	1	22
MIR166b	+	550	AACGAAGAAGATTTGTCCATTT	22	1	46
MIR166b	+	551	ACGAAGAAGATTTGTCCATTT	21	1	107
MIR166b	+	552	CGAAGAAGATTTGTCCATTT	20	1	301
MIR166b	+	552	CGAAGAAGATTTGTCCATT	19	1	3
MIR166b	+	553	GAAGAAGATTTGTCCATT	18	1	31
MIR166b	+	553	GAAGAAGATTTGTCCATTT	19	1	4895
MIR166c	+	436	TCGGACCAGGCTTCATTCC	19	7	1
MIR166c	+	487	CTTTCTTTAGTCTTTTTTGTCTTA	24	1	1
MIR166c	+	488	TTTCTTTAGTCTTTTTTGTCTTA	23	1	2
MIR166c	+	489	TTCTTTAGTCTTTTTTGTCTTA	22	1	3
MIR166c	+	490	TCTTTAGTCTTTTTTGTCTTA	21	1	5
MIR166c	+	491	CTTTAGTCTTTTTTGTCTTA	20	1	269
MIR166c	+	492	TTTAGTCTTTTTTGTCTT	18	1	1
MIR166c	+	492	TTTAGTCTTTTTTGTCTTA	19	1	1272
MIR166c	+	493	TTAGTCTTTTTTGTCTTA	18	1	32
MIR166d	+	507	TCGGACCAGGCTTCATTCC	19	7	1
MIR166d	+	528	CCAACCGACATATCACATTCTTACTTAATTCTTTTTTCTT	40	1	1
MIR166d	+	560	TTTTTCTTTTTTGTCTATCTGCTTT	25	1	2
MIR166d	+	561	TTTTCTTTTTTGTCTATCTGCTTT	24	1	4
MIR166d	+	562	TTTCTTTTTTGTCTATCTGCTTT	23	1	1
MIR166d	+	563	TTCTTTTTTGTCTATCTGCTTT	22	1	5
MIR166d	+	564	TCTTTTTTGTCTATCTGCTTT	21	1	9
MIR166d	+	565	CTTTTTTGTCTATCTGCTT	19	1	3
MIR166d	+	565	CTTTTTTGTCTATCTGCT	18	1	1
MIR166d	+	565	CTTTTTTGTCTATCTGCTTT	20	1	786
MIR166d	+	566	TTTTTTGTCTATCTGCTT	18	1	8
MIR166d	+	566	TTTTTTGTCTATCTGCTTT	19	1	1958
MIR166d	+	567	TTTTTGTCTATCTGCTTT	18	1	20
MIR166e	+	793	ATATATATGTCTCTTCTTTATTCATTAGTCTATACATGAA	40	1	1
MIR166e	+	840	TTTACGGTTAATGACGTCGGACCAGGCTTCATTCCCCTCA	40	1	1
MIR166e	+	856	TCGGACCAGGCTTCATTCC	19	7	1
MIR166e	+	874	CCCTCAATTATATCGCTTCGATCTTTCCTTCTTTGAGTAA	40	1	1
MIR166e	+	876	CTCAATTATATCGCTTCGATCTTTCCTTCTTTGAGTAAAC	40	1	1
MIR166e	+	877	TCAATTATATCGCTTCGATCTTTCCTTCTTTGAGTAAACT	40	1	52
MIR166e	+	879	AATTATATCGCTTCGATCTTTCCTTCTTTGAGTAAACTAT	40	1	1
MIR166e	+	898	TTCCTTCTTTGAGTAAACTATCTCCAGGTT	30	1	1
MIR166e	+	899	TCCTTCTTTGAGTAAACTATCTCCAGGTT	29	1	2
MIR166e	+	905	TTTGAGTAAACTATCTCCAGGTT	23	1	1
MIR166e	+	906	TTGAGTAAACTATCTCCAGGTT	22	1	5
MIR166e	+	907	TGAGTAAACTATCTCCAGGTT	21	1	9
MIR166e	+	908	GAGTAAACTATCTCCAGGTT	20	1	455
MIR166e	+	908	GAGTAAACTATCTCCAGGT	19	1	2
MIR166e	+	909	AGTAAACTATCTCCAGGTT	19	1	3
MIR166f	+	418	CCTGGCTCGAGACCATTCAATCTCATGATCTCATGATTAT	40	1	1
MIR166f	+	430	CCATTCAATCTCATGATCTCATGATTATAACGATGATGAT	40	1	3
MIR166f	+	477	TCGGACCAGGCTTCATTCC	19	7	1
MIR166f	+	488	TTCATTCCCCTCAACTTACACGTTTTGCTTCTCAATCTTC	40	1	1
MIR166f	+	489	TCATTCCCCTCAACTTACACGTTTTGCTTCTCAATCTTCA	40	1	8
MIR166f	+	498	TCAACTTACACGTTTTGCTTCTCAATCTTCAAGACCAATC	40	1	8
MIR166f	+	515	CTTCTCAATCTTCAAGACCAA	21	1	1
MIR166f	+	523	TCTTCAAGACCAATCGTTAGCCGATCA	27	1	8
MIR166f	+	525	TTCAAGACCAATCGTTAGCCGATCA	25	1	2
MIR166f	+	526	TCAAGACCAATCGTTAGCCGATCA	24	1	2
MIR166f	+	527	CAAGACCAATCGTTAGCCGATCA	23	1	15
MIR166f	+	528	AAGACCAATCGTTAGCCGATCA	22	1	86
MIR166f	+	529	AGACCAATCGTTAGCCGATCA	21	1	395
MIR166f	+	530	GACCAATCGTTAGCCGATCA	20	1	1999
MIR166f	+	530	GACCAATCGTTAGCCGATC	19	1	1
MIR166f	+	531	ACCAATCGTTAGCCGATCA	19	1	1
MIR166f	+	532	CCAATCGTTAGCCGATCA	18	1	785
MIR166g	+	479	TCGGACCAGGCTTCATTCC	19	7	1
MIR166g	+	543	TATATCACTTCTCAGTTCTCACCCC	25	1	2
MIR166g	+	544	ATATCACTTCTCAGTTCTCACCCC	24	1	4
MIR166g	+	545	TATCACTTCTCAGTTCTCACCCC	23	1	47
MIR166g	+	545	TATCACTTCTCAGTTCTCACCC	22	1	2
MIR166g	+	546	ATCACTTCTCAGTTCTCACCCC	22	1	202
MIR166g	+	547	TCACTTCTCAGTTCTCACCCC	21	1	301
MIR166g	+	548	CACTTCTCAGTTCTCACCC	19	1	11
MIR166g	+	548	CACTTCTCAGTTCTCACC	18	1	1
MIR166g	+	548	CACTTCTCAGTTCTCACCCC	20	1	4187
MIR166g	+	549	ACTTCTCAGTTCTCACCC	18	1	53
MIR166g	+	549	ACTTCTCAGTTCTCACCCC	19	1	17466
MIR166g	+	550	CTTCTCAGTTCTCACCCC	18	1	41
MIR167a	+	321	GAACAGAAAAATCTCTCTTTCTCTTTCTTGATCTGCTACG	40	1	1
MIR167a	+	326	GAAAAATCTCTCTTTCTCTTTCTTGATCTGCTACGGTGAA	40	1	1
MIR167a	+	389	TGAAGCTGCCAGCATGATCTAATTAGCTTTCTTTATCCTT	40	1	2
MIR167a	+	390	GAAGCTGCCAGCATGATCTAATTAGCTTTCTTTATCCTTT	40	1	1
MIR167a	+	483	AGTTTCACCCGTTGACTGTCGCACCCTTCTATAAACCCTA	40	1	1
MIR167a	+	492	CGTTGACTGTCGCACCCTTCTATAAACCCTAAATTTTCTC	40	1	90
MIR167a	+	493	GTTGACTGTCGCACCCTTCTATAAACCCTAAATTTTCTCT	40	1	4
MIR167a	+	498	CTGTCGCACCCTTCTATAAACCCTAAATTTTCTCTCTATC	40	1	1
MIR167a	+	511	CTATAAACCCTAAATTTTCTCTCTATCT	28	1	1
MIR167a	+	514	TAAACCCTAAATTTTCTCTCTATCT	25	1	1
MIR167a	+	515	AAACCCTAAATTTTCTCTCTATCT	24	1	3
MIR167a	+	516	AACCCTAAATTTTCTCTCTATCT	23	1	4
MIR167a	+	517	ACCCTAAATTTTCTCTCTATCT	22	1	14
MIR167a	+	517	ACCCTAAATTTTCTCTCTATC	21	1	1
MIR167a	+	518	CCCTAAATTTTCTCTCTATCT	21	1	41
MIR167a	+	519	CCTAAATTTTCTCTCTATCT	20	1	175
MIR167a	+	520	CTAAATTTTCTCTCTATCT	19	1	1238
MIR167a	+	520	CTAAATTTTCTCTCTATC	18	1	8
MIR167a	+	521	TAAATTTTCTCTCTATCT	18	1	8
MIR167a	+	644	TCACTATATTGTTGTGTGTATGTGGATCTGAAGAATTTAT	40	1	2
MIR167a	+	1202	CTAAGAAAAATGTTGTGCAAAAGACTTTTAGGCTTTGGAG	40	1	1
MIR167a	+	1546	ATTTCTCGGCCTCATGCTTGATCAAAATTTCTTTAGTAGC	40	1	1
MIR167b	+	6	TCTCTCTCTCTCTTTCTTCCTCTCTTAGCTGTATGCATTA	40	1	1
MIR167b	+	16	TCTTTCTTCCTCTCTTAGCTGTATGCATTATGATGCGTCT	40	1	1
MIR167b	+	163	TTCTATAAGTATCTATAGCGCCTCTTAAACCACAAAGCAT	40	1	1
MIR167b	+	377	GAAGCTGCCAGCATGATCTATCTTTGGTTAAGAGATGAAT	40	1	1
MIR167b	+	394	CTATCTTTGGTTAAGAGATGAATGTGGAAACATATTGCTT	40	1	1
MIR167b	+	406	AAGAGATGAATGTGGAAACATATTGCTTAAACCCAAGCTA	40	1	2
MIR167b	+	414	AATGTGGAAACATATTGCTTAAACCCAAGCTAGGTCATGC	40	1	1
MIR167b	+	417	GTGGAAACATATTGCTTAAACCCAAGCTAGGTCATGCTCT	40	1	5
MIR167b	+	418	TGGAAACATATTGCTTAAACCCAAGCTAGGTCATGCTCTG	40	1	2
MIR167b	+	419	GGAAACATATTGCTTAAACCCAAGCTAGGTCATGCTCTGA	40	1	2
MIR167b	+	436	ACCCAAGCTAGGTCATGCTCTGACAGCCTCACTCCTTCCT	40	1	2
MIR167b	+	445	AGGTCATGCTCTGACAGCCTCACTCCTTCCTGGTTTAGGA	40	1	4
MIR167b	+	448	TCATGCTCTGACAGCCTCACTCCTTCCTGGTTTAGGACCA	40	1	2
MIR167b	+	449	CATGCTCTGACAGCCTCACTCCTTCCTGGTTTAGGACCAT	40	1	1
MIR167b	+	450	ATGCTCTGACAGCCTCACTCCTTCCTGGTTTAGGACCATT	40	1	7
MIR167b	+	451	TGCTCTGACAGCCTCACTCCTTCCTGGTTTAGGACCATTC	40	1	1
MIR167b	+	460	AGCCTCACTCCTTCCTGGTTTAGGACCATTCATTGATGAA	40	1	4
MIR167b	+	463	CTCACTCCTTCCTGGTTTAGGACCATTCATTGATGAAGCA	40	1	1
MIR167b	+	469	CCTTCCTGGTTTAGGACCATTCATTGATGAAGCATTCCAC	40	1	124
MIR167b	+	470	CTTCCTGGTTTAGGACCATTCATTGATGAAGCATTCCACA	40	1	5
MIR167b	+	471	TTCCTGGTTTAGGACCATTCATTGATGAAGCATTCCACAT	40	1	4
MIR167b	+	472	TCCTGGTTTAGGACCATTCATTGATGAAGCATTCCACATG	40	1	4
MIR167b	+	473	CCTGGTTTAGGACCATTCATTGATGAAGCATTCCACATGC	40	1	5
MIR167b	+	475	TGGTTTAGGACCATTCATTGATGAAGCATTCCACATGCCG	40	1	3
MIR167b	+	477	GTTTAGGACCATTCATTGATGAAGCATTCCACATGCCGAT	40	1	1
MIR167b	+	478	TTTAGGACCATTCATTGATGAAGCATTCCACATGCCGATT	40	1	1
MIR167b	+	479	TTAGGACCATTCATTGATGAAGCATTCCACATGCCGATTG	40	1	1
MIR167b	+	493	TGATGAAGCATTCCACATGCCGATTGA	27	1	1
MIR167b	+	498	AAGCATTCCACATGCCGATTGA	22	1	28
MIR167b	+	499	AGCATTCCACATGCCGATTGA	21	1	40
MIR167b	+	500	GCATTCCACATGCCGATTGA	20	1	126
MIR167b	+	501	CATTCCACATGCCGATTGA	19	1	7
MIR167b	+	502	ATTCCACATGCCGATTGA	18	1	149
MIR167c	+	672	GCTAATGATTGTAGCATGAAGGAGAAGAAGAAGAAGAAGA	40	1	1
MIR167c	+	701	GAAGAAGAAGAAGACATACAGTAAATACT	29	1	1
MIR167c	+	708	AAGAAGACATACAGTAAATACT	22	1	2
MIR167c	+	709	AGAAGACATACAGTAAATACT	21	1	3
MIR167c	+	710	GAAGACATACAGTAAATACT	20	1	7
MIR167d	+	892	GTTCAAAATTCTGTTTTTATTAGTATATATATAGATGTAT	40	1	1
MIR167d	+	999	CACTAAATCACCAACAATGCAAAAAAGATATAAACACTTC	40	1	70
MIR167d	+	1000	ACTAAATCACCAACAATGCAAAAAAGATATAAACACTTCA	40	1	1
MIR167d	+	1004	AATCACCAACAATGCAAAAAAGATATAAACACTTCATTTC	40	1	1
MIR167d	+	1030	AAACACTTCATTTCATGAGAAAG	23	1	2
MIR167d	+	1032	ACACTTCATTTCATGAGAAAG	21	1	7
MIR167d	+	1033	CACTTCATTTCATGAGAAAG	20	1	320
MIR167d	+	1034	ACTTCATTTCATGAGAAAG	19	1	431
MIR167d	+	1035	CTTCATTTCATGAGAAAG	18	1	1
MIR168a	+	470	AACCAATTCGGCTGACACAGCCTCGTGACTTTTAAACCTT	40	1	1
MIR168a	+	472	CCAATTCGGCTGACACAGCCTCGTGACTTTTAAACCTTTA	40	1	4
MIR168a	+	532	GGATCCCGCCTTGCATCAACTGAATCGGATCCTCGAGGTG	40	1	1
MIR168a	+	538	CGCCTTGCATCAACTGAATCGGATCCTCGAGGTGTAAAAA	40	1	1
MIR168a	+	551	CTGAATCGGATCCTCGAGGTGTAAAAAAACTCGTAAATCC	40	1	2
MIR168a	+	556	TCGGATCCTCGAGGTGTAAAAAAACTCGTAAATCCTATCA	40	1	19
MIR168a	+	557	CGGATCCTCGAGGTGTAAAAAAAC	24	1	4
MIR168a	+	557	CGGATCCTCGAGGTGTAAAAAAACTCGTAAATCCTATCAG	40	1	2793
MIR168a	+	558	GGATCCTCGAGGTGTAAAAAAACTCGTAAATCCTATCAGA	40	1	75
MIR168a	+	562	CCTCGAGGTGTAAAAAAACTCGTAAATCCTATCAGATCTG	40	1	2
MIR168a	+	563	CTCGAGGTGTAAAAAAACTCGTAAATCCTATCAGATCTGG	40	1	2
MIR168a	+	566	GAGGTGTAAAAAAACTCGTAAATCCTATCAGATCTGGAAG	40	1	1
MIR168a	+	568	GGTGTAAAAAAACTCGTAAATCCTATCAGATCTGGAAGAT	40	1	1
MIR168a	+	570	TGTAAAAAAACTCGTAAATCCTATCAGATCTGGAAGATTT	40	1	11
MIR168a	+	575	AAAAACTCGTAAATCCTATCAGATCTGGAAGATT	34	1	1
MIR168a	+	576	AAAACTCGTAAATCCTATCAGATCTGGAAGATT	33	1	1
MIR168a	+	578	AACTCGTAAATCCTATCAGATCTGGAAGATT	31	1	4
MIR168a	+	579	ACTCGTAAATCCTATCAGATCTGGAAGATT	30	1	1
MIR168a	+	581	TCGTAAATCCTATCAGATCTGGAAGATT	28	1	1
MIR168a	+	582	CGTAAATCCTATCAGATCTGGAAGATT	27	1	1
MIR168a	+	585	AAATCCTATCAGATCTGGAAGATT	24	1	3
MIR168a	+	587	ATCCTATCAGATCTGGAAGATT	22	1	4
MIR168a	+	588	TCCTATCAGATCTGGAAGATT	21	1	12
MIR168a	+	589	CCTATCAGATCTGGAAGATT	20	1	232
MIR168a	+	589	CCTATCAGATCTGGAAGAT	19	1	2
MIR168a	+	590	CTATCAGATCTGGAAGAT	18	1	11
MIR168a	+	590	CTATCAGATCTGGAAGATT	19	1	1348
MIR168a	+	591	TATCAGATCTGGAAGATT	18	1	8
MIR168a	+	674	GGTTTTTTATATCTTTGAATCTGAAATTGTTTGTTTTAGA	40	1	1
MIR168a	+	675	GTTTTTTATATCTTTGAATCTGAAATTGTTTGTTTTAGAA	40	1	1
MIR168a	+	683	TATCTTTGAATCTGAAATTGTTTGTTTTAGAATA	34	1	1
MIR168a	+	691	AATCTGAAATTGTTTGTTTTAGAATATTGTATATCTGATT	40	1	2
MIR168a	+	704	TTGTTTTAGAATATTGTATATCTGATTTTTATCCCTTTTT	40	1	1
MIR168a	+	714	ATATTGTATATCTGATTTTTATCCCTTTTTATATTTGAAT	40	1	1
MIR168a	+	859	TGTAGGAGTATGAGGACTCTTGAATTTAAGATCTAGGTTT	40	1	1
MIR168a	+	927	AGTTCTAGATTTATTGATCGTTACAGCAATCTAATTAAGA	40	1	1
MIR168a	+	1127	ATGTTTATAATTGTGGCTTTACGATTTAACAATTCACTCT	40	1	1
MIR168a	+	1146	TACGATTTAACAATTCACTCTGTGTGACTTTGTAGATGAC	40	1	2
MIR168a	+	1147	ACGATTTAACAATTCACTCTGTGTGACTTTGTAGATGACA	40	1	3
MIR168a	+	1148	CGATTTAACAATTCACTCTGTGTGACTTTGTAGATGACAA	40	1	2
MIR168a	+	1152	TTAACAATTCACTCTGTGTGACTTTGTAGATGACAATGAT	40	1	4
MIR168a	+	1168	TGTGACTTTGTAGATGACAATGATTGAATTAGTTATGCTA	40	1	1
MIR168a	+	1203	TGCTAAGAGATGAAGAGAGGATTCATTGGAGGCATGTGAA	40	1	1
MIR168b	+	478	CCGTCTTGTATCAACTGAATCGGAGTCCGAGGTGAAAAAA	40	1	1
MIR168b	+	498	CGGAGTCCGAGGTGAAAAAATAAGGATCCAACTATCAGAT	40	1	58
MIR168b	+	499	GGAGTCCGAGGTGAAAAAATAAGGATCCAACTATCAGATC	40	1	1
MIR168b	+	526	CAACTATCAGATCTGACACAATT	23	1	2
MIR168b	+	527	AACTATCAGATCTGACACAATT	22	1	13
MIR168b	+	528	ACTATCAGATCTGACACAATT	21	1	24
MIR168b	+	529	CTATCAGATCTGACACAATT	20	1	221
MIR168b	+	529	CTATCAGATCTGACACAAT	19	1	2
MIR168b	+	530	TATCAGATCTGACACAAT	18	1	8
MIR168b	+	530	TATCAGATCTGACACAATT	19	1	690
MIR168b	+	531	ATCAGATCTGACACAATT	18	1	20
MIR169a	+	579	TCCTTGGCTACACGTTACTTTGTGTCGCGCATAGGTGTTA	40	1	1
MIR169a	+	582	TTGGCTACACGTTACTTTGTGTCGCGCATAGGTGTTATAT	40	1	2
MIR169a	+	591	CGTTACTTTGTGTCGCGCATAGGTGTTATATGGTAAAGAT	40	1	540
MIR169a	+	592	GTTACTTTGTGTCGCGCATAGGTGTTATATGGTAAAGATC	40	1	25
MIR169a	+	593	TTACTTTGTGTCGCGCATAGGTGTTATATGGTAAAGATCG	40	1	11
MIR169a	+	594	TACTTTGTGTCGCGCATAGGTGTTATATGGTAAAGATCGC	40	1	1
MIR169a	+	595	ACTTTGTGTCGCGCATAGGTGTTATATGGTAAAGA	35	1	1
MIR169a	+	596	CTTTGTGTCGCGCATAGGTGTTATATGGTAAAGATCGCAA	40	1	1
MIR169a	+	598	TTGTGTCGCGCATAGGTGTTATATGGTAAAGATCGCAAGA	40	1	1
MIR169a	+	601	TGTCGCGCATAGGTGTTATATGGTAAAGATCGCAAGAACT	40	1	3
MIR169a	+	602	GTCGCGCATAGGTGTTATATGGTAAAGATCGCAAGAACTC	40	1	1
MIR169a	+	604	CGCGCATAGGTGTTATATGGTAAAGATCGCAAGAACTCAA	40	1	1
MIR169a	+	608	CATAGGTGTTATATGGTAAAGATCGCAAGAACTC	34	1	2
MIR169a	+	608	CATAGGTGTTATATGGTAAAGATCGCAAGAACTCAAGCTA	40	1	1
MIR169a	+	610	TAGGTGTTATATGGTAAAGATCGCAAGAACTC	32	1	2
MIR169a	+	613	GTGTTATATGGTAAAGATCGCAAGAACTCAAGCTAAGGAA	40	1	1
MIR169a	+	614	TGTTATATGGTAAAGATCGCAAGAACTC	28	1	1
MIR169a	+	615	GTTATATGGTAAAGATCGCAAGAACTC	27	1	1
MIR169a	+	618	ATATGGTAAAGATCGCAAGAACTC	24	1	5
MIR169a	+	619	TATGGTAAAGATCGCAAGAACTC	23	1	2
MIR169a	+	620	ATGGTAAAGATCGCAAGAACTC	22	1	5
MIR169a	+	621	TGGTAAAGATCGCAAGAACTC	21	1	9
MIR169a	+	622	GGTAAAGATCGCAAGAACTC	20	1	382
MIR169a	+	623	GTAAAGATCGCAAGAACTC	19	1	1
MIR169b	+	634	CAAACTTTCCTTGGGATATTCTACCTTTTCATT	33	1	3
MIR169b	+	644	TTGGGATATTCTACCTTTTCATT	23	1	1
MIR169b	+	646	GGGATATTCTACCTTTTCATT	21	1	5
MIR169b	+	647	GGATATTCTACCTTTTCAT	19	1	3
MIR169b	+	647	GGATATTCTACCTTTTCATT	20	1	666
MIR169b	+	648	GATATTCTACCTTTTCATT	19	1	7
MIR169c	+	955	TTACGATGACACGTAAAAAATCC	23	1	1
MIR169c	+	956	TACGATGACACGTAAAAAATCC	22	1	6
MIR169c	+	957	ACGATGACACGTAAAAAATCC	21	1	9
MIR169c	+	958	CGATGACACGTAAAAAATCC	20	1	65
MIR169c	+	959	GATGACACGTAAAAAATCC	19	1	389
MIR169c	+	959	GATGACACGTAAAAAATC	18	1	1
MIR169c	+	960	ATGACACGTAAAAAATCC	18	1	3
MIR169d	+	623	TCAAACTCTAGATATCTCTATCCGTTATAT	30	1	3
MIR169d	+	632	AGATATCTCTATCCGTTATAT	21	1	7
MIR169d	+	633	GATATCTCTATCCGTTATAT	20	1	53
MIR169e	+	582	TCAAACTCTAGATACCTAACCACATATCAT	30	1	16
MIR169e	+	583	CAAACTCTAGATACCTAACCACATATCAT	29	1	2
MIR169e	+	585	AACTCTAGATACCTAACCACATATCAT	27	1	1
MIR169e	+	588	TCTAGATACCTAACCACATATCAT	24	1	1
MIR169e	+	589	CTAGATACCTAACCACATATCAT	23	1	1
MIR169e	+	590	TAGATACCTAACCACATATCAT	22	1	13
MIR169e	+	591	AGATACCTAACCACATATCAT	21	1	205
MIR169e	+	591	AGATACCTAACCACATATCA	20	1	1
MIR169e	+	592	GATACCTAACCACATATCAT	20	1	881
MIR169e	+	592	GATACCTAACCACATATCA	19	1	5
MIR169e	+	593	ATACCTAACCACATATCAT	19	1	24
MIR169e	+	594	TACCTAACCACATATCAT	18	1	13
MIR169f	+	709	TTAGATTCCAGATATACATTAGTCATGA	28	1	3
MIR169f	+	713	ATTCCAGATATACATTAGTCATGA	24	1	2
MIR169f	+	714	TTCCAGATATACATTAGTCATGA	23	1	11
MIR169f	+	715	TCCAGATATACATTAGTCATGA	22	1	13
MIR169f	+	716	CCAGATATACATTAGTCATGA	21	1	60
MIR169f	+	717	CAGATATACATTAGTCATGA	20	1	1130
MIR169f	+	717	CAGATATACATTAGTCATG	19	1	3
MIR169f	+	718	AGATATACATTAGTCATGA	19	1	4911
MIR169f	+	718	AGATATACATTAGTCATG	18	1	1
MIR169f	+	719	GATATACATTAGTCATGA	18	1	10
MIR169g	+	695	GATGACTTGCCGGGTTTTTTTACCAATGAATCTAATTAAC	40	1	1
MIR169g	+	761	TTGGCTCTGTTTCCTTCTCTTCTTTTGGATGTCAGACTCC	40	1	1
MIR169g	+	766	TCTGTTTCCTTCTCTTCTTTTGGATGTCAGACTCCAAGAT	40	1	3
MIR169g	+	792	TCAGACTCCAAGATATCTATCATCATGA	28	1	21
MIR169g	+	793	CAGACTCCAAGATATCTATCATCATGA	27	1	1
MIR169g	+	796	ACTCCAAGATATCTATCATCATGA	24	1	3
MIR169g	+	797	CTCCAAGATATCTATCATCATGA	23	1	5
MIR169g	+	798	TCCAAGATATCTATCATCATGA	22	1	17
MIR169g	+	799	CCAAGATATCTATCATCATGA	21	1	148
MIR169g	+	800	CAAGATATCTATCATCATG	19	1	1
MIR169g	+	800	CAAGATATCTATCATCATGA	20	1	1557
MIR169g	+	801	AAGATATCTATCATCATG	18	1	7
MIR169g	+	801	AAGATATCTATCATCATGA	19	1	3170
MIR169g	+	802	AGATATCTATCATCATGA	18	1	13
MIR169h	+	866	ATTTCTCTTTTTTGGGAAACTTAA	24	1	1
MIR169h	+	867	TTTCTCTTTTTTGGGAAACTTAA	23	1	4
MIR169h	+	868	TTCTCTTTTTTGGGAAACTTAA	22	1	4
MIR169h	+	869	TCTCTTTTTTGGGAAACTTAA	21	1	3
MIR169h	+	870	CTCTTTTTTGGGAAACTTAA	20	1	79
MIR169h	+	871	TCTTTTTTGGGAAACTTAA	19	1	115
MIR169h	+	872	CTTTTTTGGGAAACTTAA	18	1	2
MIR169j	+	853	CTTTTTTCATTCACGTTATACCTGTTTTTCTTTCTGTCTC	40	1	1
MIR169j	+	868	TTATACCTGTTTTTCTTTCTGTCTCC	26	1	14
MIR169j	+	871	TACCTGTTTTTCTTTCTGTCTCC	23	1	6
MIR169j	+	872	ACCTGTTTTTCTTTCTGTCTCC	22	1	16
MIR169j	+	873	CCTGTTTTTCTTTCTGTCTCC	21	1	119
MIR169j	+	874	CTGTTTTTCTTTCTGTCTC	19	1	2
MIR169j	+	874	CTGTTTTTCTTTCTGTCTCC	20	1	1510
MIR169j	+	875	TGTTTTTCTTTCTGTCTCC	19	1	3256
MIR169j	+	875	TGTTTTTCTTTCTGTCTC	18	1	5
MIR169j	+	876	GTTTTTCTTTCTGTCTCC	18	1	3
MIR169k	+	642	CATGTTGAATCTTGCGGGTTAGGTTTCAGGCAGTCTCTTT	40	2	1
MIR169k	+	712	TTATACTTATTTTTCTGTCTTCCGAATCACTAGA	34	1	37
MIR169k	+	713	TATACTTATTTTTCTGTCTTCCGAATCACTAGA	33	1	4
MIR169k	+	721	TTTTTCTGTCTTCCGAATCACTAGA	25	1	2
MIR169k	+	722	TTTTCTGTCTTCCGAATCACTAGA	24	1	1
MIR169k	+	723	TTTCTGTCTTCCGAATCACTAGA	23	1	4
MIR169k	+	724	TTCTGTCTTCCGAATCACTAGA	22	1	1
MIR169k	+	726	CTGTCTTCCGAATCACTAGA	20	1	300
MIR169k	+	727	TGTCTTCCGAATCACTAGA	19	1	375
MIR169k	+	727	TGTCTTCCGAATCACTAG	18	1	1
MIR169k	+	1067	CCTTCATCCAAAATAAGATA	20	1	21
MIR169k	+	1068	CTTCATCCAAAATAAGATA	19	1	181
MIR169m	+	892	CATGTTGAATCTTGCGGGTTAGGTTTCAGGCAGTCTCTTT	40	2	1
MIR169m	+	962	TTATACCTACTTTTCTTTCTGTCTTCAAA	29	1	6
MIR169m	+	967	CCTACTTTTCTTTCTGTCTTCAAA	24	1	1
MIR169m	+	968	CTACTTTTCTTTCTGTCTTCAAA	23	1	7
MIR169m	+	969	TACTTTTCTTTCTGTCTTCAAA	22	1	4
MIR169m	+	970	ACTTTTCTTTCTGTCTTCAAA	21	1	14
MIR169m	+	971	CTTTTCTTTCTGTCTTCA	18	1	1
MIR169m	+	971	CTTTTCTTTCTGTCTTCAAA	20	1	933
MIR169m	+	971	CTTTTCTTTCTGTCTTCAA	19	1	5
MIR169m	+	972	TTTTCTTTCTGTCTTCAA	18	1	11
MIR169m	+	972	TTTTCTTTCTGTCTTCAAA	19	1	2647
MIR169m	+	973	TTTCTTTCTGTCTTCAAA	18	1	21
MIR169m	+	1315	TCAGACGTTTACCTTCATTCAAAAT	25	1	4
MIR169m	+	1316	CAGACGTTTACCTTCATTCAAAAT	24	1	2
MIR169m	+	1319	ACGTTTACCTTCATTCAAAAT	21	1	2
MIR169m	+	1320	CGTTTACCTTCATTCAAAA	19	1	2
MIR169m	+	1320	CGTTTACCTTCATTCAAAAT	20	1	65
MIR169m	+	1321	GTTTACCTTCATTCAAAAT	19	1	310
MIR169m	+	1322	TTTACCTTCATTCAAAAT	18	1	1
MIR169m	+	1506	CATTCGAAATTGCATGGTATTTGGTGTTCATATCATGGAA	40	1	1
MIR170	+	230	GCACATTCACTCCCTTCTTCTTCTTAATCTCCTTACAGTT	40	1	1
MIR170	+	302	TTTACAAAACAGATACACTATGTTTCCGAGAGAGTCCCTC	40	1	1
MIR170	+	322	TGTTTCCGAGAGAGTCCCTCTGATATTGGCCTGGTTCACT	40	1	1
MIR170	+	326	TCCGAGAGAGTCCCTCTGATATTGGCCTGGTTCACTCAGA	40	1	1
MIR170	+	333	GAGTCCCTCTGATATTGGCCTGGTTCACTCAGATTCTCTT	40	1	2
MIR170	+	336	TCCCTCTGATATTGGCCTGGTTCACTCAGATTCTCTTTTA	40	1	2
MIR170	+	339	CTCTGATATTGGCCTGGTTCACTCAGATTCTCTTTTACTA	40	1	2
MIR170	+	340	TCTGATATTGGCCTGGTTCACTCAGATTCTCTTTTACTAA	40	1	1
MIR170	+	349	GGCCTGGTTCACTCAGATTCTCTTTTACTAACTCATCTGA	40	1	1
MIR170	+	358	CACTCAGATTCTCTTTTACTAACTCATCTGATTGAGCCGT	40	1	2
MIR170	+	363	AGATTCTCTTTTACTAACTCATCTGATTGAGCCGTGTCAA	40	1	1
MIR170	+	367	TCTCTTTTACTAACTCATCTGATTGAGCCGTGTCAATATC	40	1	1
MIR170	+	386	TGATTGAGCCGTGTCAATATCTCAGTCCTCTCTCGTCGCT	40	1	1
MIR170	+	391	GAGCCGTGTCAATATCTCAGTCCTCTCTCGTCGCTTCTCT	40	1	1
MIR170	+	407	TCAGTCCTCTCTCGTCGCTTCTCTCGTATTTTGAAGTTTG	40	1	72
MIR170	+	408	CAGTCCTCTCTCGTCGCTTCTCTCGTATTTTGAAGTTTGC	40	1	1
MIR170	+	409	AGTCCTCTCTCGTCGCTTCTCTCGTATTTTGAAGTTTGCC	40	1	1
MIR170	+	410	GTCCTCTCTCGTCGCTTCTCTCGTATTTTGAAGTTTGCCT	40	1	1
MIR170	+	415	CTCTCGTCGCTTCTCTCGTATTTTGAAGTTTGCCTCGTTA	40	1	1
MIR170	+	428	TCTCGTATTTTGAAGTTTGCCTCGTTAGGTC	31	1	1
MIR170	+	434	ATTTTGAAGTTTGCCTCGTTAGGTC	25	1	1
MIR170	+	435	TTTTGAAGTTTGCCTCGTTAGGTC	24	1	1
MIR170	+	437	TTGAAGTTTGCCTCGTTAGG	20	1	1
MIR170	+	437	TTGAAGTTTGCCTCGTTAGGTC	22	1	7
MIR170	+	438	TGAAGTTTGCCTCGTTAGGTC	21	1	38
MIR170	+	439	GAAGTTTGCCTCGTTAGGT	19	1	1
MIR170	+	439	GAAGTTTGCCTCGTTAGGTC	20	1	334
MIR170	+	440	AAGTTTGCCTCGTTAGGTC	19	1	4
MIR171a	+	443	CCTTTGATATTGGCCTGGTTCACTCAGATCTTACCTGACC	40	1	2
MIR171a	+	450	TATTGGCCTGGTTCACTCAGATCTTACCTGACCACACACG	40	1	20
MIR171a	+	519	TGATTGAGCCGCGCCAATA	19	1	16
MIR171a	+	533	CAATATCTCAGTACTCTCTCGTCTCTATTTTGGACTTTGT	40	1	1
MIR171a	+	540	TCAGTACTCTCTCGTCTCTATTTTGGACTTTGTGGTCTTG	40	1	87
MIR171a	+	541	CAGTACTCTCTCGTCTCTATTTTGGACTTTGTGGTCTTGT	40	1	3
MIR171a	+	543	GTACTCTCTCGTCTCTATTTTGGACTTTGTGGTCTTGTAG	40	1	4
MIR171a	+	546	CTCTCTCGTCTCTATTTTGGACTTTGTGGTCTTGTAGATC	40	1	2
MIR171a	+	557	CTATTTTGGACTTTGTGGTCTTGTAGATCGATTT	34	1	1
MIR171a	+	566	ACTTTGTGGTCTTGTAGATCGATTT	25	1	2
MIR171a	+	568	TTTGTGGTCTTGTAGATCGATTT	23	1	9
MIR171a	+	569	TTGTGGTCTTGTAGATCGATTT	22	1	31
MIR171a	+	570	TGTGGTCTTGTAGATCGATTT	21	1	53
MIR171a	+	570	TGTGGTCTTGTAGATCGATT	20	1	1
MIR171a	+	571	GTGGTCTTGTAGATCGAT	18	1	2
MIR171a	+	571	GTGGTCTTGTAGATCGATTT	20	1	1629
MIR171a	+	571	GTGGTCTTGTAGATCGATT	19	1	4
MIR171a	+	572	TGGTCTTGTAGATCGATTT	19	1	20
MIR171a	+	573	GGTCTTGTAGATCGATTT	18	1	4
MIR171b	+	550	AGATATTAGTGCGGTTCAA	19	1	3
MIR171b	+	613	TTGAGCCGTGCCAATATCACGCGGTAAACCAAAAATGGCA	40	1	8
MIR171b	+	614	TGAGCCGTGCCAATATCACGCGGTAAACCAAAAATGGCAA	40	1	1
MIR171b	+	634	CGGTAAACCAAAAATGGCAAAGATAGTTATTATAACCTTA	40	1	31
MIR171b	+	635	GGTAAACCAAAAATGGCAAAGATAGTTATTATAACCTTAA	40	1	1
MIR171b	+	661	TATTATAACCTTAAAGGTATGTATCATT	28	1	2
MIR171b	+	663	TTATAACCTTAAAGGTATGTATCATT	26	1	2
MIR171b	+	667	AACCTTAAAGGTATGTATCATT	22	1	1
MIR171b	+	668	ACCTTAAAGGTATGTATCATT	21	1	3
MIR171b	+	669	CCTTAAAGGTATGTATCATT	20	1	12
MIR171b	+	670	CTTAAAGGTATGTATCATT	19	1	201
MIR171b	+	670	CTTAAAGGTATGTATCAT	18	1	2
MIR171b	+	671	TTAAAGGTATGTATCATT	18	1	1
MIR171c	+	544	AGAAAACCGTACTCTTTTGTTTTAAAGATCGGTTTATTTG	40	1	2
MIR171c	+	585	TTGAGCCGTGCCAATATCACGCGTTTAAATAGTTTAAAGA	40	1	48
MIR171c	+	586	TGAGCCGTGCCAATATCACGCGTTTAAATAGTTTAAAGAT	40	1	13
MIR171c	+	588	AGCCGTGCCAATATCACGCGTTTAAATAGTTTAAAGATTC	40	1	4
MIR171c	+	591	CGTGCCAATATCACGCGTTTAAATAGTTTAAAGATTCTAT	40	1	2
MIR171c	+	592	GTGCCAATATCACGCGTTTAAATAGTTTAAAGATTCTATG	40	1	2
MIR171c	+	593	TGCCAATATCACGCGTTTAAATAGTTTAAAGATTCTATGT	40	1	3
MIR171c	+	595	CCAATATCACGCGTTTAAATAGTTTAAAGATTCTATGTTA	40	1	2
MIR171c	+	597	AATATCACGCGTTTAAATAGTTTAAAGATTCTATGTTAGT	40	1	2
MIR171c	+	606	CGTTTAAATAGTTTAAAGATTCTATGTTAGTTGATGTGAT	40	1	286
MIR171c	+	607	GTTTAAATAGTTTAAAGATTCTATGTTAGTTGATGTGATC	40	1	13
MIR171c	+	610	TAAATAGTTTAAAGATTCTATGTTAGTTGATGTGATCAAT	40	1	2
MIR171c	+	623	GATTCTATGTTAGTTGATGTGATCAATCAAGGTAT	35	1	1
MIR171c	+	624	ATTCTATGTTAGTTGATGTGATCAATCAAGGTAT	34	1	1
MIR171c	+	626	TCTATGTTAGTTGATGTGATCAATCAAGGTAT	32	1	4
MIR171c	+	634	AGTTGATGTGATCAATCAAGGTAT	24	1	2
MIR171c	+	635	GTTGATGTGATCAATCAAGGTAT	23	1	36
MIR171c	+	636	TTGATGTGATCAATCAAGGTAT	22	1	44
MIR171c	+	637	TGATGTGATCAATCAAGGTA	20	1	1
MIR171c	+	637	TGATGTGATCAATCAAGGTAT	21	1	143
MIR171c	+	638	GATGTGATCAATCAAGGTA	19	1	10
MIR171c	+	638	GATGTGATCAATCAAGGTAT	20	1	4316
MIR171c	+	639	ATGTGATCAATCAAGGTAT	19	1	51
MIR171c	+	640	TGTGATCAATCAAGGTAT	18	1	8
MIR172a	+	674	TCTCTCTCTCTCTCTCTCTCTC	22	6	1
MIR172a	+	675	CTCTCTCTCTCTCTCTCTC	19	11	1
MIR172a	+	675	CTCTCTCTCTCTCTCTCTCTC	21	7	1
MIR172a	+	677	CTCTCTCTCTCTCTCTCTC	19	11	1
MIR172a	+	1289	GTGGCATCATCAAGATTCACATCTGTTGATGGACGGTGGT	40	1	1
MIR172a	+	1310	TCTGTTGATGGACGGTGGTGATTCACTCTCCACAAAGTTC	40	1	1
MIR172a	+	1331	TTCACTCTCCACAAAGTTCTCTATGAAAATGAGAATCTTG	40	1	1
MIR172a	+	1368	TTGATGATGCTGCATCGGCAATCAACGACTATTCTTTCCC	40	1	1
MIR172a	+	1371	ATGATGCTGCATCGGCAATCAACGACTATTCTTTCCCTCT	40	1	1
MIR172a	+	1383	CGGCAATCAACGACTATTCTTTCCCTCTCTCTCTCTCTCC	40	1	108
MIR172a	+	1384	GGCAATCAACGACTATTCTTTCCCTCTCTCTCTCTCTCCC	40	1	1
MIR172a	+	1407	CTCTCTCTCTCTCTCCCTCTGTATAGATTATT	32	1	12
MIR172a	+	1408	TCTCTCTCTCTCTCCCTCTGTATAGATTATT	31	1	5
MIR172a	+	1409	CTCTCTCTCTCTCCCTCTGTATAGATTATT	30	1	18
MIR172a	+	1410	TCTCTCTCTCTCCCTCTGTATAGATTATT	29	1	12
MIR172a	+	1411	CTCTCTCTCTCCCTCTGTATAGATTATT	28	1	18
MIR172a	+	1412	TCTCTCTCTCCCTCTGTATAGATTATT	27	1	23
MIR172a	+	1413	CTCTCTCTCCCTCTGTATAGATTATT	26	1	26
MIR172a	+	1413	CTCTCTCTCCCTCTGTATAGATTAT	25	1	1
MIR172a	+	1414	TCTCTCTCCCTCTGTATAGATTATT	25	1	46
MIR172a	+	1415	CTCTCTCCCTCTGTATAGATTATT	24	1	77
MIR172a	+	1416	TCTCTCCCTCTGTATAGATTAT	22	1	1
MIR172a	+	1416	TCTCTCCCTCTGTATAGATTATT	23	1	95
MIR172a	+	1417	CTCTCCCTCTGTATAGATTAT	21	1	1
MIR172a	+	1417	CTCTCCCTCTGTATAGATTATT	22	1	162
MIR172a	+	1418	TCTCCCTCTGTATAGATTATT	21	1	234
MIR172a	+	1418	TCTCCCTCTGTATAGATTAT	20	1	4
MIR172a	+	1419	CTCCCTCTGTATAGATTATT	20	1	5907
MIR172a	+	1419	CTCCCTCTGTATAGATTAT	19	1	20
MIR172a	+	1420	TCCCTCTGTATAGATTAT	18	1	68
MIR172a	+	1420	TCCCTCTGTATAGATTATT	19	1	14093
MIR172a	+	1421	CCCTCTGTATAGATTATT	18	1	56
MIR172a	+	2269	ATTATGTCTTGTAGTACATCTTGTTATATGTGTGTTTAGT	40	1	1
MIR172a	+	2270	TTATGTCTTGTAGTACATCTTGTTATATGTGTGTT	35	1	9
MIR172a	+	2271	TATGTCTTGTAGTACATCTTGTTATATGTGTGTTTAGTAA	40	1	1
MIR172a	+	2347	ACTTTCCATTAGTCATTGTAGAAATAAATCTTTTTTTTTT	40	1	1
MIR172a	+	2634	ACTCCAACTTGCAGCTATATTGCTAATCACATAAG	35	1	2
MIR172a	+	2771	TAAATGGACTCGATATGTTTTAATCGGAAGAATTTTATGT	40	1	1
MIR172a	+	2912	AGAATCTTTGCGTATAATGGATCTGACAAAATGAGATGGT	40	1	4
MIR172a	+	2913	GAATCTTTGCGTATAATGGATCTGACAAAATGAGA	35	1	1
MIR172a	+	2928	ATGGATCTGACAAAATGAGATGGTAATATTAGCTCGAGGG	40	1	2
MIR172a	+	2980	TGTGTGGTCCATTAGCATTGAAATCAAACGCAACGCTGAG	40	1	2
MIR172a	+	2982	TGTGGTCCATTAGCATTGAAATCAAACGCAACGCTGAGTA	40	1	2
MIR172a	+	3004	CAAACGCAACGCTGAGTATGTGAGGACCATTTCTTTATAG	40	1	1
MIR172a	+	3022	TGTGAGGACCATTTCTTTATAGTCGTATCTATTATTCCCA	40	1	1
MIR172b	+	318	GTTTTTCTCTCTACTTCACCTATCTACTTTTCCTCATATC	40	1	2
MIR172b	+	570	TGGAAGAAAGCTCATCTGTCGTTGTTTGTAGGCGCAGCAC	40	1	1
MIR172b	+	596	TGTAGGCGCAGCACCATTAAGATTCACATGGAAATTGATA	40	1	1
MIR172b	+	601	GCGCAGCACCATTAAGATTCACATGGAAATTGATAAATAC	40	1	1
MIR172b	+	603	GCAGCACCATTAAGATTCACATGGAAATTGATAAATACCC	40	1	1
MIR172b	+	612	TTAAGATTCACATGGAAATTGATAAATACCCTAAATTAGG	40	1	4
MIR172b	+	624	TGGAAATTGATAAATACCCTAAATTAGGGTTTTGATATGT	40	1	1
MIR172b	+	636	AATACCCTAAATTAGGGTTTTGATATGTATATGAGAATCT	40	1	1
MIR172b	+	663	TATATGAGAATCTTGATGATGCTGCATCAACAATCGACGG	40	1	2
MIR172b	+	669	AGAATCTTGATGATGCTGCATCAACAATCGACGGCTACAA	40	1	1
MIR172b	+	672	ATCTTGATGATGCTGCATCAACAATCGACGGCTACAAATA	40	1	1
MIR172b	+	673	TCTTGATGATGCTGCATCAACAATCGACGGCTACAAATAC	40	1	2
MIR172b	+	676	TGATGATGCTGCATCAACAATCGACGGCTACAAATACCTA	40	1	7
MIR172b	+	678	ATGATGCTGCATCAACAATCGACGGCTACAAATACCTAAA	40	1	3
MIR172b	+	679	TGATGCTGCATCAACAATCGACGGCTACAAATACCTAAAG	40	1	1
MIR172b	+	681	ATGCTGCATCAACAATCGACGGCTACAAATACCTAAAGCT	40	1	2
MIR172b	+	685	TGCATCAACAATCGACGGCTACAAATACCTAAAGCTTGAG	40	1	1
MIR172b	+	687	CATCAACAATCGACGGCTACAAATACCTAAAGCTTGAGAA	40	1	4
MIR172b	+	688	ATCAACAATCGACGGCTACAAATACCTAAAGCTTGAGAAA	40	1	2
MIR172b	+	690	CAACAATCGACGGCTACAAATACCTAAAGCTTGAGAAAGA	40	1	480
MIR172b	+	691	AACAATCGACGGCTACAAATACCTAAAGCTTGAGAAAGAA	40	1	45
MIR172b	+	692	ACAATCGACGGCTACAAATACCTAAAGCTTGAGAAAGAAA	40	1	8
MIR172b	+	693	CAATCGACGGCTACAAATACCTAAAGCTTGAGAAAGAAAC	40	1	5
MIR172b	+	695	ATCGACGGCTACAAATACCTAAAGCTTGAGAAAGAAACTT	40	1	1
MIR172b	+	696	TCGACGGCTACAAATACCTAAAGCTTGAGAAAGAAACTTG	40	1	2
MIR172b	+	697	CGACGGCTACAAATACCTAAAGCTTGAGAAAGAAACTTGA	40	1	4
MIR172b	+	710	TACCTAAAGCTTGAGAAAGAAACTTGAAGATA	32	1	1
MIR172b	+	711	ACCTAAAGCTTGAGAAAGAAACTTGAAGATA	31	1	1
MIR172b	+	718	GCTTGAGAAAGAAACTTGAAGATA	24	1	1
MIR172b	+	719	CTTGAGAAAGAAACTTGAAGATA	23	1	4
MIR172b	+	720	TTGAGAAAGAAACTTGAAGATA	22	1	19
MIR172b	+	721	TGAGAAAGAAACTTGAAGATA	21	1	54
MIR172b	+	722	GAGAAAGAAACTTGAAGATA	20	1	2017
MIR172b	+	723	AGAAAGAAACTTGAAGATA	19	1	15
MIR172b	+	751	GTCTGGATCGATCTTTGGTAAATCTCTCTCTTGATTAGTT	40	1	1
MIR172c	+	910	CTGCAATCAGTGGCTTACACATAGAAACAGGTTTGTGTTG	40	1	1
MIR172c	+	940	GTTTGTGTTGATTGGAAATTTCAT	24	1	4
MIR172c	+	941	TTTGTGTTGATTGGAAATTTCAT	23	1	1
MIR172c	+	942	TTGTGTTGATTGGAAATTTCAT	22	1	2
MIR172c	+	943	TGTGTTGATTGGAAATTTCAT	21	1	2
MIR172c	+	944	GTGTTGATTGGAAATTTCAT	20	1	73
MIR172c	+	945	TGTTGATTGGAAATTTCAT	19	1	1
MIR172c	+	946	GTTGATTGGAAATTTCAT	18	1	2
MIR172d	+	511	CGGCAATTAAATGGCTTACTTATCTAGGGTCTTTTTTTCC	40	1	54
MIR172d	+	540	TCTTTTTTTCCATTTTCATCATGTGGTTA	29	1	1
MIR172d	+	544	TTTTTCCATTTTCATCATGTGGTTA	25	1	9
MIR172d	+	545	TTTTCCATTTTCATCATGTGGTTA	24	1	25
MIR172d	+	546	TTTCCATTTTCATCATGTGGTTA	23	1	60
MIR172d	+	547	TTCCATTTTCATCATGTGGTTA	22	1	80
MIR172d	+	548	TCCATTTTCATCATGTGGTTA	21	1	264
MIR172d	+	549	CCATTTTCATCATGTGGTTA	20	1	1667
MIR172d	+	550	CATTTTCATCATGTGGTT	18	1	4
MIR172d	+	550	CATTTTCATCATGTGGTTA	19	1	7777
MIR172d	+	551	ATTTTCATCATGTGGTTA	18	1	38
MIR172e	+	512	GGTTCCCTTTGCTTTCGCCTCTCGATCCGCAGAAAAGGGT	40	1	1
MIR172e	+	556	TATCGAGTGGGAATCTTGATGATGCTGCATCAGCAAATAC	40	1	2
MIR172e	+	577	ATGCTGCATCAGCAAATACATGGCTACTCTTGTCACTTCT	40	1	1
MIR172e	+	578	TGCTGCATCAGCAAATACATGGCTACTCTTGTCACTTCTT	40	1	1
MIR172e	+	586	CAGCAAATACATGGCTACTCTTGTCACTTCTTTTTTGTCA	40	1	4
MIR172e	+	614	TCTTTTTTGTCATTCTCTAGTGAAGAGA	28	1	1
MIR172e	+	620	TTGTCATTCTCTAGTGAAGAGA	22	1	3
MIR172e	+	621	TGTCATTCTCTAGTGAAGAGA	21	1	9
MIR172e	+	622	GTCATTCTCTAGTGAAGAGA	20	1	66
MIR173	+	538	TAAGCGAAAGAGCTTGCTCCCTAAACTTATCTCTCTGATG	40	1	1
MIR173	+	548	AGCTTGCTCCCTAAACTTATCTCTCTGATGATTTAATGTT	40	1	5
MIR173	+	576	TGATTTAATGTTAGAGATCTT	21	1	2
MIR173	+	577	GATTTAATGTTAGAGATCTT	20	1	8
MIR319a	+	564	AATGAATGATGCGGTAGACAAATTGGATCATTGATTCTCT	40	1	8
MIR319a	+	585	ATTGGATCATTGATTCTCTTTGATTGGACTGAAGGGAGCT	40	1	1
MIR319a	+	586	TTGGATCATTGATTCTCTTTGATTGGACTGAAGGGAGCTC	40	1	1
MIR319a	+	587	TGGATCATTGATTCTCTTTGATTGGACTGAAGGGAGCTCC	40	1	8
MIR319a	+	589	GATCATTGATTCTCTTTGATTGGACTGAAGGGAGCTCCCT	40	1	5
MIR319a	+	608	TTGGACTGAAGGGAGCTCCCTCTCTCTT	28	1	11
MIR319a	+	615	GAAGGGAGCTCCCTCTCTCTT	21	1	1
MIR319a	+	629	CTCTCTTTTGTATTCCAATTTTCTTGATTAATCTT	35	1	1
MIR319a	+	655	ATTAATCTTTCCTGCACAAAAACATGCTTG	30	1	1
MIR319a	+	660	TCTTTCCTGCACAAAAACATGCTTG	25	1	4
MIR319a	+	661	CTTTCCTGCACAAAAACATGCTTG	24	1	12
MIR319a	+	662	TTTCCTGCACAAAAACATGCTTG	23	1	86
MIR319a	+	663	TTCCTGCACAAAAACATGCTTG	22	1	158
MIR319a	+	664	TCCTGCACAAAAACATGCTTG	21	1	283
MIR319a	+	665	CCTGCACAAAAACATGCTTG	20	1	3925
MIR319a	+	666	CTGCACAAAAACATGCTTG	19	1	12428
MIR319a	+	666	CTGCACAAAAACATGCTT	18	1	5
MIR319a	+	667	TGCACAAAAACATGCTTG	18	1	32
MIR319b	+	967	AATGAATGATGCGAGAGACAAATTGAGTCTTCACTTCTCT	40	1	1
MIR319b	+	1032	ATTTTTATCTTTCTCAGAGTACCACATTTTATATCTATAT	40	1	1
MIR319b	+	1059	TTTATATCTATATATATACAAGC	23	1	2
MIR319b	+	1060	TTATATCTATATATATACAAGC	22	1	13
MIR319b	+	1063	TATCTATATATATACAAGC	19	1	1
MIR319b	+	1149	CATTGGACTCATATGAGTGTTTATAGTGTTGTTTTGCAGG	40	1	1
MIR319b	+	1151	TTGGACTCATATGAGTGTTTATAGTGTTGTTTTGCAGGAT	40	1	3
MIR319c	+	843	TATTTTTGATCCTTCTTTATCTGTGTTTGGACTGAAGGGA	40	1	1
MIR319c	+	845	TTTTTGATCCTTCTTTATCTGTGTTTGGACTGAAGGGAGC	40	1	1
MIR319c	+	846	TTTTGATCCTTCTTTATCTGTGTTTGGACTGAAGGGAGCT	40	1	8
MIR319c	+	850	GATCCTTCTTTATCTGTGTTTGGACTGAAGGGAGCTCCTT	40	1	1
MIR319c	+	863	CTGTGTTTGGACTGAAGGGAGCTCCTTCTTTTTCTACAAA	40	1	2
MIR319c	+	867	GTTTGGACTGAAGGGAGCTCCTTCTTTTTCTACAAATTTT	40	1	1
MIR319c	+	868	TTTGGACTGAAGGGAGCTCCTTCTTTTTCTACAAATTTTC	40	1	3
MIR319c	+	869	TTGGACTGAAGGGAGCTCCTTCTTTTTCTACAAATTTTCA	40	1	1
MIR319c	+	875	TGAAGGGAGCTCCTTCTTTTTCTACAAATTTTCATTTTTC	40	1	1
MIR319c	+	888	TTCTTTTTCTACAAATTTTCATTTTTCTCATAATCTGTTT	40	1	1
MIR319c	+	889	TCTTTTTCTACAAATTTTCATTTTTCTCATAATCTGTTTA	40	1	5
MIR319c	+	890	CTTTTTCTACAAATTTTCATTTTTCTCATAATCTGTTTAT	40	1	5
MIR319c	+	891	TTTTTCTACAAATTTTCATTTTTCTCATAATCTGTTTATA	40	1	3
MIR319c	+	892	TTTTCTACAAATTTTCATTTTTCTCATAATCTGTTTATAT	40	1	1
MIR319c	+	917	ATAATCTGTTTATATGTGATGAGTA	25	1	1
MIR319c	+	919	AATCTGTTTATATGTGATGAGTA	23	1	14
MIR319c	+	920	ATCTGTTTATATGTGATGAGTA	22	1	63
MIR319c	+	921	TCTGTTTATATGTGATGAGTA	21	1	95
MIR319c	+	922	CTGTTTATATGTGATGAGTA	20	1	1197
MIR319c	+	922	CTGTTTATATGTGATGAGT	19	1	2
MIR319c	+	923	TGTTTATATGTGATGAGTA	19	1	4458
MIR319c	+	923	TGTTTATATGTGATGAGT	18	1	4
MIR319c	+	924	GTTTATATGTGATGAGTA	18	1	7
MIR390a	+	666	TGTAAAGCTCAGGAGGGATAGCGCCATGATGATCACATTC	40	1	3
MIR390a	+	743	TTGGCTCTTCTTACTACAATGAAAAAGGCCGAGGCAAAAC	40	1	41
MIR390a	+	771	CCGAGGCAAAACGCCTAAAATC	22	1	1
MIR390a	+	772	CGAGGCAAAACGCCTAAAATC	21	1	5
MIR390a	+	773	GAGGCAAAACGCCTAAAATC	20	1	37
MIR390a	+	774	AGGCAAAACGCCTAAAATC	19	1	1
MIR390b	+	659	AAGCTCAGGAGGGATAGCGCCATGGCTCACCAGTGCTGTA	40	1	1
MIR390b	+	660	AGCTCAGGAGGGATAGCGCCATGGCTCACCAGTGCTGTAT	40	1	1
MIR390b	+	694	CTGTATGTTTTGTATATGCGTACATGTATATCTGTTGGCG	40	1	2
MIR390b	+	733	GCTATCCATCCTGAGTTCCATAGCTTCTTCTTGCTTATAT	40	1	5
MIR390b	+	734	CTATCCATCCTGAGTTCCATAGCTTCTTCTTGCTTATATG	40	1	6
MIR390b	+	741	TCCTGAGTTCCATAGCTTCTTCTTGCTTATATGTGATTCC	40	1	1
MIR390b	+	750	CCATAGCTTCTTCTTGCTTATATGTGATTCCTACTTCATT	40	1	5
MIR390b	+	753	TAGCTTCTTCTTGCTTATATGTGATTCCTACTTCATTCCC	40	1	28
MIR390b	+	754	AGCTTCTTCTTGCTTATATGTGATTCCTACTTCATTCCCT	40	1	15
MIR390b	+	779	CCTACTTCATTCCCTCCTTCGTTT	24	1	1
MIR390b	+	780	CTACTTCATTCCCTCCTTCGTTT	23	1	8
MIR390b	+	781	TACTTCATTCCCTCCTTCGTT	21	1	1
MIR390b	+	781	TACTTCATTCCCTCCTTCGTTT	22	1	53
MIR390b	+	782	ACTTCATTCCCTCCTTCGTTT	21	1	78
MIR390b	+	783	CTTCATTCCCTCCTTCGTT	19	1	9
MIR390b	+	783	CTTCATTCCCTCCTTCGTTT	20	1	2541
MIR390b	+	784	TTCATTCCCTCCTTCGTT	18	1	30
MIR390b	+	784	TTCATTCCCTCCTTCGTTT	19	1	4595
MIR390b	+	785	TCATTCCCTCCTTCGTTT	18	1	15
MIR391	+	818	TCTCCTACGTAGCAATCCTTATATATGCATCTTAATACGG	40	1	4
MIR391	+	820	TCCTACGTAGCAATCCTTATATATGCATCTTAATACGGAG	40	1	3
MIR391	+	824	ACGTAGCAATCCTTATATATGCATCTTAATACGGAGAGAT	40	1	1
MIR391	+	830	CAATCCTTATATATGCATCTTAATACGGAGAGATCAAGGT	40	1	3
MIR391	+	831	AATCCTTATATATGCATCTTAATACGGAGAGATCAAGGTA	40	1	20
MIR391	+	854	ACGGAGAGATCAAGGTATTTCAGTTGT	27	1	1
MIR391	+	856	GGAGAGATCAAGGTATTTCAGTTGT	25	1	2
MIR391	+	858	AGAGATCAAGGTATTTCAGTTGT	23	1	71
MIR391	+	859	GAGATCAAGGTATTTCAGTTGT	22	1	15
MIR391	+	860	AGATCAAGGTATTTCAGTTGT	21	1	228
MIR391	+	860	AGATCAAGGTATTTCAGTTG	20	1	1
MIR391	+	861	GATCAAGGTATTTCAGTTGT	20	1	1271
MIR391	+	861	GATCAAGGTATTTCAGTTG	19	1	1
MIR391	+	862	ATCAAGGTATTTCAGTTGT	19	1	28
MIR393a	+	915	TCTTTGGATTCATCCTTCGGTAGCTTCCTCTTCGA	35	1	3
MIR393a	+	925	CATCCTTCGGTAGCTTCCTCTTCGA	25	1	71
MIR393a	+	930	TTCGGTAGCTTCCTCTTCGATCGTATG	27	1	1
MIR393a	+	932	CGGTAGCTTCCTCTTCGATCGTATG	25	1	6
MIR393a	+	934	GTAGCTTCCTCTTCGATCGTATG	23	1	2
MIR393a	+	935	TAGCTTCCTCTTCGATCGTATG	22	1	37
MIR393a	+	936	AGCTTCCTCTTCGATCGTATG	21	1	124
MIR393a	+	937	GCTTCCTCTTCGATCGTAT	19	1	3
MIR393a	+	937	GCTTCCTCTTCGATCGTATG	20	1	634
MIR393a	+	938	CTTCCTCTTCGATCGTATG	19	1	23
MIR393a	+	939	TTCCTCTTCGATCGTATG	18	1	131
MIR393b	+	1255	TCCAAAGGGATCGCATTGATCCTAATTAAGCTGATTTATT	40	1	18
MIR393b	+	1397	CATTCTTTGGTAGCTTCCACTCCGGTCAAAGGGTTTCATG	40	1	6
MIR393b	+	1423	CAAAGGGTTTCATGACCGGAGACA	24	1	1
MIR393b	+	1424	AAAGGGTTTCATGACCGGAGACA	23	1	8
MIR393b	+	1425	AAGGGTTTCATGACCGGAGACA	22	1	33
MIR393b	+	1426	AGGGTTTCATGACCGGAGACA	21	1	120
MIR393b	+	1427	GGGTTTCATGACCGGAGACA	20	1	392
MIR393b	+	1428	GGTTTCATGACCGGAGACA	19	1	19
MIR394a	+	1106	TTGGCATTCTGTCCACCTCC	20	2	1
MIR394a	+	1220	TAAAACCCTCTTGATCTATATACAAGT	27	1	4
MIR394a	+	1221	AAAACCCTCTTGATCTATATACAAGT	26	1	1
MIR394a	+	1224	ACCCTCTTGATCTATATACAAGT	23	1	1
MIR394a	+	1225	CCCTCTTGATCTATATACAAGT	22	1	3
MIR394a	+	1226	CCTCTTGATCTATATACAAGT	21	1	15
MIR394a	+	1227	CTCTTGATCTATATACAAGT	20	1	74
MIR394a	+	1227	CTCTTGATCTATATACAAG	19	1	1
MIR394a	+	1228	TCTTGATCTATATACAAGT	19	1	126
MIR394a	+	1229	CTTGATCTATATACAAGT	18	1	1
MIR394b	+	1320	TTTGGCATTCTGTCCACCTCCTCTCTCTATATTTATGTGT	40	1	1
MIR394b	+	1321	TTGGCATTCTGTCCACCTCC	20	2	1
MIR394b	+	1400	TGGGCATACTGCCAATAGAGATCTGTTAGGGTTTCTTTGT	40	1	2
MIR394b	+	1439	TAAAACCCCTCATGATTTGATATATAA	27	1	4
MIR394b	+	1440	AAAACCCCTCATGATTTGATATATAA	26	1	1
MIR394b	+	1443	ACCCCTCATGATTTGATATATAA	23	1	1
MIR394b	+	1444	CCCCTCATGATTTGATATATAA	22	1	4
MIR394b	+	1445	CCCTCATGATTTGATATATAA	21	1	28
MIR394b	+	1446	CCTCATGATTTGATATATAA	20	1	338
MIR394b	+	1446	CCTCATGATTTGATATATA	19	1	2
MIR394b	+	1447	CTCATGATTTGATATATA	18	1	3
MIR394b	+	1447	CTCATGATTTGATATATAA	19	1	1247
MIR394b	+	1448	TCATGATTTGATATATAA	18	1	8
MIR394b	+	2240	TTGCGCTTATTTTGATATTATAGGTACTTTGTTTTTTTCT	40	1	1
MIR394b	+	2643	TGTAGATTTATACATTTACCATAAGTTTGAAAAATTACAA	40	1	1
MIR394b	+	2798	TCCAAACTTTTCTACGCGATTTAACTATGCGCGTGACTCC	40	1	1
MIR395a	+	995	CCGGACCCATTCAACGGATTTCCGCAGGTCGAGACGAGAT	40	1	11
MIR395a	+	1024	CGAGACGAGATTTTATATGGTAA	23	1	4
MIR395a	+	1025	GAGACGAGATTTTATATGGTAA	22	1	60
MIR395a	+	1026	AGACGAGATTTTATATGGTAA	21	1	63
MIR395a	+	1027	GACGAGATTTTATATGGTAA	20	1	180
MIR395a	+	1027	GACGAGATTTTATATGGTA	19	1	3
MIR395a	+	1028	ACGAGATTTTATATGGTAA	19	1	1
MIR395a	+	1029	CGAGATTTTATATGGTAA	18	1	18
MIR395b	+	986	CCTTTAACGCTTCATTGTTAAATACTCAAAGCCACATTGG	40	1	1
MIR395b	+	1049	TGGGGGGACTCTTGGTGTCATTCTGGCGTAGTGACCACCA	40	1	2
MIR395b	+	1058	TCTTGGTGTCATTCTGGCGTAGTGACCACCATTGCAGCCG	40	1	1
MIR395b	+	1060	TTGGTGTCATTCTGGCGTAGTGACCACCATTGCAGCCGTT	40	1	132
MIR395b	+	1061	TGGTGTCATTCTGGCGTAGTGACCACCATTGCAGCCGTTT	40	1	6
MIR395b	+	1088	ATTGCAGCCGTTTTATGGGTTCTT	24	1	6
MIR395b	+	1089	TTGCAGCCGTTTTATGGGTTCTT	23	1	10
MIR395b	+	1090	TGCAGCCGTTTTATGGGTTCTT	22	1	33
MIR395b	+	1091	GCAGCCGTTTTATGGGTTCT	20	1	7
MIR395b	+	1091	GCAGCCGTTTTATGGGTTCTT	21	1	1678
MIR395b	+	1092	CAGCCGTTTTATGGGTTC	18	1	1
MIR395b	+	1092	CAGCCGTTTTATGGGTTCTT	20	1	6458
MIR395b	+	1092	CAGCCGTTTTATGGGTTCT	19	1	22
MIR395b	+	1093	AGCCGTTTTATGGGTTCTT	19	1	31740
MIR395b	+	1093	AGCCGTTTTATGGGTTCT	18	1	124
MIR395b	+	1093	AGCCGTTTTATGGGTTCTTT	20	1	2
MIR395b	+	1094	GCCGTTTTATGGGTTCTT	18	1	382
MIR395c	+	1269	TTGGTGTCATTCTGGCGTTGAAGTGGCCACCATTGCTGCG	40	1	6
MIR395c	+	1299	CATTGCTGCGGTTTTCTATTATCT	24	1	2
MIR395c	+	1300	ATTGCTGCGGTTTTCTATTATCT	23	1	1
MIR395c	+	1301	TTGCTGCGGTTTTCTATTATCT	22	1	5
MIR395c	+	1302	TGCTGCGGTTTTCTATTATCT	21	1	10
MIR395c	+	1303	GCTGCGGTTTTCTATTATCT	20	1	128
MIR395c	+	1303	GCTGCGGTTTTCTATTATCTT	21	1	1
MIR395c	+	1303	GCTGCGGTTTTCTATTATC	19	1	1
MIR395c	+	1305	TGCGGTTTTCTATTATCT	18	1	49
MIR395c	+	1305	TGCGGTTTTCTATTATCTT	19	1	1
MIR395c	+	1982	TAACTATAAAAAATCGACCAA	21	1	1
MIR395c	+	2149	CAACCTGAAAGTCTAATTTTCTGGCTCTTTCTTCAGGCCA	40	1	1
MIR395d	+	139	ACTCGTAAGATTCTGATCATACAAGGAAAGAGATTGTTTA	40	2	1
MIR395d	+	1542	TGTAAAATGGTAACTTTATAC	21	2	5
MIR395d	+	1543	GTAAAATGGTAACTTTATAC	20	2	26
MIR395d	+	1544	TAAAATGGTAACTTTATAC	19	2	1
MIR395e	+	140	ACTCGTAAGATTCTGATCATACAAGGAAAGAGATTGTTTA	40	2	1
MIR395e	+	1543	TGTAAAATGGTAACTTTATAC	21	2	5
MIR395e	+	1544	GTAAAATGGTAACTTTATAC	20	2	26
MIR395e	+	1545	TAAAATGGTAACTTTATAC	19	2	1
MIR396a	+	1336	ACAACTTCAACTTCCCTCTTTCTCTATATTACGCTTTTGC	40	1	3
MIR396a	+	1549	GTTCAATAAAGCTGTGGGAAGATACAGACAGAGTCAAATG	40	1	4
MIR396a	+	1554	ATAAAGCTGTGGGAAGATACAGACAGAGTCAAATGATTTT	40	1	1
MIR396a	+	1558	AGCTGTGGGAAGATACAGACAGAGTCAAATGATTTTCTAA	40	1	2
MIR396a	+	1568	AGATACAGACAGAGTCAAATGATTTTCTAAATTTCGTTCA	40	1	3
MIR396a	+	1570	ATACAGACAGAGTCAAATGATTTTCTAAATTTCGT	35	1	60
MIR396a	+	1598	ATTTCGTTCATATATATGAAAGCG	24	1	3
MIR396a	+	1599	TTTCGTTCATATATATGAAAGCG	23	1	1
MIR396a	+	1601	TCGTTCATATATATGAAAGCG	21	1	1
MIR396a	+	1602	CGTTCATATATATGAAAGCG	20	1	24
MIR396a	+	1603	GTTCATATATATGAAAGC	18	1	3
MIR396a	+	1603	GTTCATATATATGAAAGCG	19	1	308
MIR396b	+	1409	AAGCTGTGGGAAAACATGACAATTCAGGGTTTTACTCCAT	40	1	1
MIR396b	+	1410	AGCTGTGGGAAAACATGACAATTCAGGGTTTTACTCCATT	40	1	6
MIR396b	+	1413	TGTGGGAAAACATGACAATTCAGGGTTTTACTCCATTGAT	40	1	8
MIR396b	+	1422	ACATGACAATTCAGGGTTTTACTCCATTGATTCACTTGTC	40	1	22
MIR396b	+	1452	TTCACTTGTCAAGATTCTTCTT	22	1	10
MIR396b	+	1453	TCACTTGTCAAGATTCTTCTT	21	1	18
MIR396b	+	1454	CACTTGTCAAGATTCTTCT	19	1	4
MIR396b	+	1454	CACTTGTCAAGATTCTTCTT	20	1	377
MIR396b	+	1455	ACTTGTCAAGATTCTTCTT	19	1	1258
MIR396b	+	1455	ACTTGTCAAGATTCTTCT	18	1	15
MIR396b	+	1456	CTTGTCAAGATTCTTCTT	18	1	4
MIR396b	+	2229	ATGCATGCAGAACATATTTACATACATAGAGA	32	1	1
MIR396b	+	2284	GTCCTGAAGAGAAGGAATTGTCAGTAATTTAACTTGGAGT	40	1	1
MIR396b	+	2331	GTCTTCCTCTGTCGATTCCTTTTTCTCTTTTTCATATCAA	40	1	1
MIR396b	+	2507	CGTCTTCTTCTTCATTTGTCAATTAAATCTTCCTTTCATT	40	1	1
MIR397a	+	947	GTTTTTCTAATTTTCAGGAACACTTAAACAGGTATGCGGA	40	1	1
MIR397a	+	948	TTTTTCTAATTTTCAGGAACACTTAAACAGGTATGCGGAT	40	1	6
MIR397a	+	962	AGGAACACTTAAACAGGTATGCGGATCGTTTTTTA	35	1	1
MIR397a	+	966	ACACTTAAACAGGTATGCGGATCGTTTTTTA	31	1	3
MIR397a	+	972	AAACAGGTATGCGGATCGTTTTTTA	25	1	3
MIR397a	+	973	AACAGGTATGCGGATCGTTTTTTA	24	1	3
MIR397a	+	974	ACAGGTATGCGGATCGTTTTTTA	23	1	5
MIR397a	+	974	ACAGGTATGCGGATCGTTTTTT	22	1	1
MIR397a	+	975	CAGGTATGCGGATCGTTTTTTA	22	1	10
MIR397a	+	976	AGGTATGCGGATCGTTTTTTA	21	1	73
MIR397a	+	977	GGTATGCGGATCGTTTTT	18	1	2
MIR397a	+	977	GGTATGCGGATCGTTTTTTA	20	1	1229
MIR397a	+	977	GGTATGCGGATCGTTTTTT	19	1	3
MIR397a	+	978	GTATGCGGATCGTTTTTTA	19	1	50
MIR397a	+	979	TATGCGGATCGTTTTTTA	18	1	2
MIR398a	+	811	TGTGTTCTCAGGTCACCCC	19	3	434
MIR398a	+	812	GTGTTCTCAGGTCACCCC	18	3	4
MIR398a	+	875	ATTCATACTCTAAATTTGTGAGC	23	1	3
MIR398a	+	876	TTCATACTCTAAATTTGTGAGC	22	1	7
MIR398a	+	877	TCATACTCTAAATTTGTGAGC	21	1	12
MIR398a	+	878	CATACTCTAAATTTGTGAG	19	1	1
MIR398a	+	878	CATACTCTAAATTTGTGAGC	20	1	385
MIR398a	+	879	ATACTCTAAATTTGTGAGC	19	1	815
MIR398a	+	879	ATACTCTAAATTTGTGAG	18	1	3
MIR398a	+	880	TACTCTAAATTTGTGAGC	18	1	24
MIR398b	+	485	TAATAACAAGAAGATATCAATATATCATGAAGGTAGTGGA	40	1	1
MIR398b	+	503	AATATATCATGAAGGTAGTGGATCTCGACAGGGTTGATAT	40	1	1
MIR398b	+	519	AGTGGATCTCGACAGGGTTGATATGAGAACACACGAGTAA	40	1	3
MIR398b	+	527	TCGACAGGGTTGATATGAGAACACACGAGTAATCAACGGC	40	1	1
MIR398b	+	532	AGGGTTGATATGAGAACACACGAGTAATCAACGGCTGTAA	40	1	3
MIR398b	+	533	GGGTTGATATGAGAACACA	19	2	1
MIR398b	+	537	TGATATGAGAACACACGAGTAATCAACGGCTGTAATGACG	40	1	2
MIR398b	+	538	GATATGAGAACACACGAGTAATCAACGGCTGTAATGACGC	40	1	9
MIR398b	+	539	ATATGAGAACACACGAGTAATCAACGGCTGTAATGACGCT	40	1	2
MIR398b	+	541	ATGAGAACACACGAGTAATCAACGGCTGTAATGACGCTAC	40	1	6
MIR398b	+	542	TGAGAACACACGAGTAATCAACGGCTGTAATGACGCTACG	40	1	9
MIR398b	+	544	AGAACACACGAGTAATCAACGGCTGTAATGACGCTACGTC	40	1	4
MIR398b	+	548	CACACGAGTAATCAACGGCTGTAATGACGCTACGTCATTG	40	1	1
MIR398b	+	576	GCTACGTCATTGTTACAGCTCTCGTTTTCATGTGTTCTCA	40	1	2
MIR398b	+	585	TTGTTACAGCTCTCGTTTTCATGTGTTCTCAGGTCACCCC	40	1	2
MIR398b	+	605	ATGTGTTCTCAGGTCACCCCTGCTGAGCTCTTTCTCTACC	40	2	1
MIR398b	+	606	TGTGTTCTCAGGTCACCCC	19	3	434
MIR398b	+	607	GTGTTCTCAGGTCACCCC	18	3	4
MIR398b	+	607	GTGTTCTCAGGTCACCCCTGCTGAGCTCTTTCTCTACCGT	40	2	8
MIR398b	+	608	TGTTCTCAGGTCACCCCTGCTGAGCTCTTTCTCTACCGTC	40	2	10
MIR398b	+	609	GTTCTCAGGTCACCCCTGCTGAGCTCTTTCTCTACCGTCC	40	2	4
MIR398b	+	610	TTCTCAGGTCACCCCTGCTGAGCTCTTTCTCTACCGTCCA	40	2	22
MIR398b	+	611	TCTCAGGTCACCCCTGCTGAGCTCTTTCTCTACCGTCCAT	40	2	17
MIR398b	+	612	CTCAGGTCACCCCTGCTGAGCTCTTTCTCTACCGTCCATC	40	2	72
MIR398b	+	613	TCAGGTCACCCCTGCTGAGCTCTTTCTCTACCGTCCATCT	40	1	14
MIR398b	+	614	CAGGTCACCCCTGCTGAGCTCTTTCTCTACCGTCCATCTT	40	1	2
MIR398b	+	615	AGGTCACCCCTGCTGAGCTCTTTCTCTACCGTCCATCTTT	40	1	6
MIR398b	+	616	GGTCACCCCTGCTGAGCTCTTTCTCTACCGTCCATCTTTT	40	1	5
MIR398b	+	618	TCACCCCTGCTGAGCTCTTTCTCTACCGTCCATCTTTTAT	40	1	3
MIR398b	+	620	ACCCCTGCTGAGCTCTTTCTCTACCGTCCATCTTTTATCA	40	1	23
MIR398b	+	621	CCCCTGCTGAGCTCTTTCTCTACCGTCCATCTTTTATCAA	40	1	22
MIR398b	+	622	CCCTGCTGAGCTCTTTCTCTACCGTCCATCTTTTATCAAG	40	1	4
MIR398b	+	623	CCTGCTGAGCTCTTTCTCTACCGTCCATCTTTTATCAAGG	40	1	7
MIR398b	+	625	TGCTGAGCTCTTTCTCTACCGTCCATCTTTTATCAAGGCT	40	1	2
MIR398b	+	627	CTGAGCTCTTTCTCTACCGTCCATCTTTTATCAAGGCTGG	40	1	3726
MIR398b	+	628	TGAGCTCTTTCTCTACCGTCCATCTTTTATCAAGGCTGGC	40	1	679
MIR398b	+	629	GAGCTCTTTCTCTACCGTCCATCTTTTATCAAGGCTGGCT	40	1	53
MIR398b	+	630	AGCTCTTTCTCTACCGTCCATCTTTTATCAAGGCTGGCTT	40	1	15
MIR398b	+	631	GCTCTTTCTCTACCGTCCATCTTTTATCAAGGCTGGCTTT	40	1	3
MIR398b	+	632	CTCTTTCTCTACCGTCCATCTTTTATCAAGGCTGGCTTTT	40	1	6
MIR398b	+	633	TCTTTCTCTACCGTCCATCTTTTATCAAGGCTGGCTTTTA	40	1	9
MIR398b	+	634	CTTTCTCTACCGTCCATCTTTTATCAAGGCTGGCTTTTAC	40	1	2
MIR398b	+	635	TTTCTCTACCGTCCATCTTTTATCAAGGCTGGCTTTTACT	40	1	6
MIR398b	+	636	TTCTCTACCGTCCATCTTTTATCAAGGCTGGCTTTTACTC	40	1	8
MIR398b	+	637	TCTCTACCGTCCATCTTTTATCAAGGCTGGCTTTTACTCA	40	1	7
MIR398b	+	638	CTCTACCGTCCATCTTTTATCAAGGCTGGCTTTTACTCAT	40	1	2
MIR398b	+	639	TCTACCGTCCATCTTTTATCAAGGCTGGCTTTTACTCATT	40	1	8
MIR398b	+	643	CCGTCCATCTTTTATCAAGGCTGGCTTTTACTCAT	35	1	4
MIR398b	+	644	CGTCCATCTTTTATCAAGGCTGGCTTTTACTCAT	34	1	18
MIR398b	+	644	CGTCCATCTTTTATCAAGGCTGGCTTTTACTCA	33	1	1
MIR398b	+	645	GTCCATCTTTTATCAAGGCTGGCTTTTACTCAT	33	1	7
MIR398b	+	646	TCCATCTTTTATCAAGGCTGGCTTTTACTCAT	32	1	15
MIR398b	+	648	CATCTTTTATCAAGGCTGGCTTTTACTCAT	30	1	12
MIR398b	+	649	ATCTTTTATCAAGGCTGGCTTTTACTCAT	29	1	2
MIR398b	+	650	TCTTTTATCAAGGCTGGCTTTTACTCAT	28	1	4
MIR398b	+	652	TTTTATCAAGGCTGGCTTTTACTCAT	26	1	1
MIR398b	+	653	TTTATCAAGGCTGGCTTTTACTCAT	25	1	1
MIR398b	+	654	TTATCAAGGCTGGCTTTTACTCAT	24	1	7
MIR398b	+	655	TATCAAGGCTGGCTTTTACTCAT	23	1	7
MIR398b	+	656	ATCAAGGCTGGCTTTTACTCAT	22	1	25
MIR398b	+	657	TCAAGGCTGGCTTTTACTCA	20	1	1
MIR398b	+	657	TCAAGGCTGGCTTTTACTCAT	21	1	82
MIR398b	+	658	CAAGGCTGGCTTTTACTCAT	20	1	1423
MIR398b	+	658	CAAGGCTGGCTTTTACTCA	19	1	29
MIR398b	+	659	AAGGCTGGCTTTTACTCA	18	1	98
MIR398b	+	659	AAGGCTGGCTTTTACTCAT	19	1	6290
MIR398b	+	659	AAGGCTGGCTTTTACTCATT	20	1	1
MIR398b	+	660	AGGCTGGCTTTTACTCAT	18	1	13
MIR398b	+	691	TAAGTTTCTATGTAAATTCGTCATCGTAAGTATTACAGAT	40	1	1
MIR398b	+	692	AAGTTTCTATGTAAATTCGTCATCGTAAGTATTACAGATG	40	1	3
MIR398b	+	701	TGTAAATTCGTCATCGTAAGTATTACAGATGAAATCACAG	40	1	1
MIR398b	+	716	GTAAGTATTACAGATGAAATCACAGTAGTACAATTGTACA	40	1	2
MIR398b	+	718	AAGTATTACAGATGAAATCACAGTAGTACAATTGTACAAA	40	1	2
MIR398c	+	538	ATCGAAACTCAAACTGTAACAGTCCTTTTATTACTGGTTT	40	1	2
MIR398c	+	604	AGTGGATCTCGACAGGGTTGATATGAGAACACACGAGCAA	40	1	9
MIR398c	+	616	CAGGGTTGATATGAGAACACACGAGCAATCAACGGCTATA	40	1	3
MIR398c	+	617	AGGGTTGATATGAGAACACACGAGCAATCAACGGCTATAA	40	1	44
MIR398c	+	618	GGGTTGATATGAGAACACA	19	2	1
MIR398c	+	622	TGATATGAGAACACACGAGCAATCAACGGCTATAACGACG	40	1	1
MIR398c	+	623	GATATGAGAACACACGAGCAATCAACGGCTATAACGACGC	40	1	29
MIR398c	+	625	TATGAGAACACACGAGCAATCAACGGCTATAACGACGCTA	40	1	3
MIR398c	+	627	TGAGAACACACGAGCAATCAACGGCTATAACGACGCTACG	40	1	11
MIR398c	+	628	GAGAACACACGAGCAATCAACGGCTATAACGACGCTACGT	40	1	1
MIR398c	+	629	AGAACACACGAGCAATCAACGGCTATAACGACGCTACGTC	40	1	17
MIR398c	+	633	CACACGAGCAATCAACGGCTATAACGACGCTACGTCATTG	40	1	1
MIR398c	+	643	ATCAACGGCTATAACGACGCTACGTCATTGTTACAGCTCT	40	1	4
MIR398c	+	655	AACGACGCTACGTCATTGTTACAGCTCTCGTTTCATGTGT	40	1	2
MIR398c	+	658	GACGCTACGTCATTGTTACAGCTCTCGTTTCATGTGTTCT	40	1	2
MIR398c	+	663	TACGTCATTGTTACAGCTCTCGTTTCATGTGTTCTCAGGT	40	1	1
MIR398c	+	671	TGTTACAGCTCTCGTTTCATGTGTTCTCAGGTCACCCCTG	40	1	2
MIR398c	+	676	CAGCTCTCGTTTCATGTGTTCTCAGGTCACCCCTGCTGAG	40	1	4
MIR398c	+	682	TCGTTTCATGTGTTCTCAGGTCACCCCTGCTGAGCTCTTT	40	1	2
MIR398c	+	689	ATGTGTTCTCAGGTCACCCCTGCTGAGCTCTTTCTCTACC	40	2	1
MIR398c	+	690	TGTGTTCTCAGGTCACCCC	19	3	434
MIR398c	+	691	GTGTTCTCAGGTCACCCC	18	3	4
MIR398c	+	691	GTGTTCTCAGGTCACCCCTGCTGAGCTCTTTCTCTACCGT	40	2	8
MIR398c	+	692	TGTTCTCAGGTCACCCCTGCTGAGCTCTTTCTCTACCGTC	40	2	10
MIR398c	+	693	GTTCTCAGGTCACCCCTGCTGAGCTCTTTCTCTACCGTCC	40	2	4
MIR398c	+	694	TTCTCAGGTCACCCCTGCTGAGCTCTTTCTCTACCGTCCA	40	2	22
MIR398c	+	695	TCTCAGGTCACCCCTGCTGAGCTCTTTCTCTACCGTCCAT	40	2	17
MIR398c	+	696	CTCAGGTCACCCCTGCTGAGCTCTTTCTCTACCGTCCATG	40	1	68
MIR398c	+	697	TCAGGTCACCCCTGCTGAGCTCTTTCTCTACCGTCCATGT	40	1	8
MIR398c	+	698	CAGGTCACCCCTGCTGAGCTCTTTCTCTACCGTCCATGTT	40	1	1
MIR398c	+	699	AGGTCACCCCTGCTGAGCTCTTTCTCTACCGTCCATGTTT	40	1	10
MIR398c	+	700	GGTCACCCCTGCTGAGCTCTTTCTCTACCGTCCATGTTTT	40	1	25
MIR398c	+	702	TCACCCCTGCTGAGCTCTTTCTCTACCGTCCATGTTTTAT	40	1	8
MIR398c	+	703	CACCCCTGCTGAGCTCTTTCTCTACCGTCCATGTTTTATC	40	1	1
MIR398c	+	704	ACCCCTGCTGAGCTCTTTCTCTACCGTCCATGTTTTATCA	40	1	22
MIR398c	+	705	CCCCTGCTGAGCTCTTTCTCTACCGTCCATGTTTTATCAA	40	1	40
MIR398c	+	706	CCCTGCTGAGCTCTTTCTCTACCGTCCATGTTTTATCAAC	40	1	21
MIR398c	+	707	CCTGCTGAGCTCTTTCTCTACCGTCCATGTTTTATCAACG	40	1	16
MIR398c	+	708	CTGCTGAGCTCTTTCTCTACCGTCCATGTTTTATCAACGC	40	1	1
MIR398c	+	709	TGCTGAGCTCTTTCTCTACCGTCCATGTTTTATCAACGCC	40	1	4
MIR398c	+	711	CTGAGCTCTTTCTCTACCGTCCATGTTTTATCAACGCCGT	40	1	3557
MIR398c	+	712	TGAGCTCTTTCTCTACCGTCCATGTTTTATCAACG	35	1	1
MIR398c	+	712	TGAGCTCTTTCTCTACCGTCCATGTTTTATCAACGCCGTG	40	1	1284
MIR398c	+	713	GAGCTCTTTCTCTACCGTCCATGTTTTATCAACGCCGTGG	40	1	49
MIR398c	+	714	AGCTCTTTCTCTACCGTCCATGTTTTATCAACGCCGTGGC	40	1	10
MIR398c	+	715	GCTCTTTCTCTACCGTCCATGTTTTATCAACGCCGTGGCC	40	1	6
MIR398c	+	716	CTCTTTCTCTACCGTCCATGTTTTATCAACGCCGTGGCCC	40	1	2
MIR398c	+	717	TCTTTCTCTACCGTCCATGTTTTATCAACGCCGTGGCCCG	40	1	5
MIR398c	+	718	CTTTCTCTACCGTCCATGTTTTATCAACGCCGTGGCCCGT	40	1	2
MIR398c	+	719	TTTCTCTACCGTCCATGTTTTATCAACGCCGTGGCCCGTG	40	1	9
MIR398c	+	720	TTCTCTACCGTCCATGTTTTATCAACGCCGTGGCCCGTGG	40	1	1
MIR398c	+	721	TCTCTACCGTCCATGTTTTATCAACGCCGTGGCCCGTGGC	40	1	5
MIR398c	+	722	CTCTACCGTCCATGTTTTATCAACGCCGTGGCCCGTGGCT	40	1	4
MIR398c	+	723	TCTACCGTCCATGTTTTATCAACGCCGTGGCCCGTGGCTT	40	1	28
MIR398c	+	724	CTACCGTCCATGTTTTATCAACGCCGTGGCCCGTGGCTTC	40	1	9
MIR398c	+	727	CCGTCCATGTTTTATCAACGCCGTGGCCCGTGGCT	35	1	4
MIR398c	+	727	CCGTCCATGTTTTATCAACGCCGTGGCCCGTGGCTTCTAT	40	1	1
MIR398c	+	728	CGTCCATGTTTTATCAACGCCGTGGCCCGTGGCTT	35	1	1
MIR398c	+	728	CGTCCATGTTTTATCAACGCCGTGGCCCGTGGCT	34	1	254
MIR398c	+	729	GTCCATGTTTTATCAACGCCGTGGCCCGTGGCT	33	1	7
MIR398c	+	730	TCCATGTTTTATCAACGCCGTGGCCCGTGGCT	32	1	6
MIR398c	+	731	CCATGTTTTATCAACGCCGTGGCCCGTGGCT	31	1	1
MIR398c	+	732	CATGTTTTATCAACGCCGTGGCCCGTGGCT	30	1	2
MIR398c	+	734	TGTTTTATCAACGCCGTGGCCCGTGGCT	28	1	3
MIR398c	+	735	GTTTTATCAACGCCGTGGCCCGTGGCT	27	1	2
MIR398c	+	736	TTTTATCAACGCCGTGGCCCGTGGCT	26	1	4
MIR398c	+	737	TTTATCAACGCCGTGGCCCGTGGCT	25	1	1
MIR398c	+	738	TTATCAACGCCGTGGCCCGTGGCT	24	1	5
MIR398c	+	739	TATCAACGCCGTGGCCCGTGGCT	23	1	8
MIR398c	+	740	ATCAACGCCGTGGCCCGTGGCT	22	1	33
MIR398c	+	741	TCAACGCCGTGGCCCGTGGCT	21	1	71
MIR398c	+	742	CAACGCCGTGGCCCGTGGCT	20	1	1049
MIR398c	+	742	CAACGCCGTGGCCCGTGGC	19	1	3
MIR398c	+	742	CAACGCCGTGGCCCGTGG	18	1	1
MIR398c	+	743	AACGCCGTGGCCCGTGGC	18	1	2
MIR398c	+	743	AACGCCGTGGCCCGTGGCT	19	1	6975
MIR398c	+	744	ACGCCGTGGCCCGTGGCT	18	1	30
MIR398c	+	1198	ATTGCTTTTGCTTTGGCCAAATGGGCCAGCAGTTCAAATG	40	1	1
MIR398c	+	1234	AATGCGACATCAACAAACGGGACGTAGACTACCACTAACC	40	1	1
MIR398c	+	1361	CCACCCCATTGTGGAAAGTAAATTGATGTAACAGAAAGAG	40	1	1
MIR398c	+	1399	AGCAAACACAAAAGTCATCAAACCCATAAGTGAAATGCTT	40	1	1
MIR398c	+	1414	CATCAAACCCATAAGTGAAATGCTTCTCTGTTTTCGAACA	40	1	1
MIR398c	+	1419	AACCCATAAGTGAAATGCTTCTCTGTTTTCGAACATCATC	40	1	4
MIR398c	+	1422	CCATAAGTGAAATGCTTCTCTGTTTTCGAACATCATCACC	40	1	1
MIR398c	+	1437	TTCTCTGTTTTCGAACATCATCACCGGAAAACAACAGAAA	40	1	1
MIR398c	+	1448	CGAACATCATCACCGGAAAACAACAGAAACTGCGTCACCA	40	1	1
MIR398c	+	1539	ATCTGTCATTATAAACAAAACCAAATTAAAACCAAACCGA	40	1	1
MIR398c	+	1586	AGCAAAAACCGGATTGGTAGACTTTAAACTAACCGCGTGG	40	1	4
MIR398c	+	1650	CAAGGCCAGAAGCAGCTTGAACGAAAACAGAGAAGACCCA	40	1	1
MIR398c	+	1667	TGAACGAAAACAGAGAAGACCCACATGACGAGGATTGATC	40	1	1
MIR398c	+	1678	AGAGAAGACCCACATGACGAGGATTGATCCCCAGAGCGAG	40	1	1
MIR398c	+	1680	AGAAGACCCACATGACGAGGATTGATCCCCAGAGCGAGTT	40	1	1
MIR398c	+	1682	AAGACCCACATGACGAGGATTGATCCCCAGAGCGAGTTGA	40	1	1
MIR398c	+	1683	AGACCCACATGACGAGGATTGATCCCCAGAGCGAGTTGAC	40	1	1
MIR398c	+	1685	ACCCACATGACGAGGATTGATCCCCAGAGCGAGTTGACTC	40	1	1
MIR398c	+	1686	CCCACATGACGAGGATTGATCCCCAGAGCGAGTTGACTCG	40	1	2
MIR398c	+	1697	AGGATTGATCCCCAGAGCGAGTTGACTCGTCCGAGTAACA	40	1	1
MIR398c	+	1701	TTGATCCCCAGAGCGAGTTGACTCGTCCGAGTAACACGCA	40	1	1
MIR398c	+	1702	TGATCCCCAGAGCGAGTTGACTCGTCCGAGTAACACGCAC	40	1	1
MIR398c	+	1703	GATCCCCAGAGCGAGTTGACTCGTCCGAGTAACACGCACA	40	1	4
MIR398c	+	1704	ATCCCCAGAGCGAGTTGACTCGTCCGAGTAACACGCACAA	40	1	4
MIR398c	+	1705	TCCCCAGAGCGAGTTGACTCGTCCGAGTAACACGCACAAC	40	1	2
MIR398c	+	1706	CCCCAGAGCGAGTTGACTCGTCCGAGTAACACGCACAACA	40	1	8
MIR398c	+	1707	CCCAGAGCGAGTTGACTCGTCCGAGTAACACGCACAACAA	40	1	1
MIR398c	+	1708	CCAGAGCGAGTTGACTCGTCCGAGTAACACGCACAACAAC	40	1	1
MIR398c	+	1710	AGAGCGAGTTGACTCGTCCGAGTAACACGCACAACAACCC	40	1	1
MIR398c	+	1712	AGCGAGTTGACTCGTCCGAGTAACACGCACAACAACCCAG	40	1	2
MIR398c	+	1718	TTGACTCGTCCGAGTAACACGCACAACAACCCAGCCACCG	40	1	2
MIR398c	+	1719	TGACTCGTCCGAGTAACACGCACAACAACCCAGCCACCGA	40	1	1
MIR398c	+	1722	CTCGTCCGAGTAACACGCACAACAACCCAGCCACCGATTG	40	1	2
MIR398c	+	1723	TCGTCCGAGTAACACGCACAACAACCCAGCCACCGATTGC	40	1	2
MIR398c	+	1730	AGTAACACGCACAACAACCCAGCCACCGATTGCACGATCC	40	1	4
MIR398c	+	1740	ACAACAACCCAGCCACCGATTGCACGATCCATAGCCCCCA	40	1	1
MIR398c	+	1746	ACCCAGCCACCGATTGCACGATCCATAGCCCCCACAGCCT	40	1	2
MIR398c	+	1793	ATACCGAATCTCTTCCCCAGCGCATCCGATATCATCCCTC	40	1	1
MIR398c	+	1795	ACCGAATCTCTTCCCCAGCGCATCCGATATCATCCCTCCC	40	1	1
MIR398c	+	1815	CATCCGATATCATCCCTCCCGCCGGTCGCGACGCAATGTT	40	1	1
MIR398c	+	1824	TCATCCCTCCCGCCGGTCGCGACGCAATGTTCGATATCCC	40	1	1
MIR398c	+	1832	CCCGCCGGTCGCGACGCAATGTTCGATATCCCGAAACTCG	40	1	2
MIR398c	+	1841	CGCGACGCAATGTTCGATATCCCGAAACTCGCCGCGATCG	40	1	1
MIR398c	+	1857	ATATCCCGAAACTCGCCGCGATCGTCCCCGCCGCCTCCAG	40	1	1
MIR398c	+	1862	CCGAAACTCGCCGCGATCGTCCCCGCCGCCTCCAGATTCA	40	1	2
MIR398c	+	1870	CGCCGCGATCGTCCCCGCCGCCTCCAGATTCACTCCAAAT	40	1	1
MIR398c	+	1880	GTCCCCGCCGCCTCCAGATTCACTCCAAATCTCTCGTAGA	40	1	2
MIR398c	+	1883	CCCGCCGCCTCCAGATTCACTCCAAATCTCTCGTAGAAAT	40	1	1
MIR398c	+	1887	CCGCCTCCAGATTCACTCCAAATCTCTCGTAGAAATATCC	40	1	1
MIR398c	+	1890	CCTCCAGATTCACTCCAAATCTCTCGTAGAAATATCCGGC	40	1	1
MIR398c	+	1930	GATCACGTTGTCCGTCGTTAGCTCGACGCCGTACGAGTAT	40	1	3
MIR398c	+	1948	TAGCTCGACGCCGTACGAGTATCCGTAGAGCAGCGCTAAG	40	1	1
MIR398c	+	1984	TAAGATCCACGCTCTGTAATTTCCAAGTCCGCCGATTAGG	40	1	3
MIR398c	+	2037	TGGAACGTTCGTCTTCTTCAACTACTAGTACTTCTTCTTC	40	1	1
MIR398c	+	2040	AACGTTCGTCTTCTTCAACTACTAGTACTTCTTCTTCTTC	40	1	1
MIR398c	+	2066	ACTTCTTCTTCTTCAGGAATTGTGAGTTTGTTCTGGTTCG	40	1	1
MIR398c	+	2069	TCTTCTTCTTCAGGAATTGTGAGTTTGTTCTGGTTCGAGT	40	1	1
MIR398c	+	2072	TCTTCTTCAGGAATTGTGAGTTTGTTCTGGTTCGAGTTTT	40	1	2
MIR398c	+	2096	TTCTGGTTCGAGTTTTTTCTGTTACCGTGGGGAGTATCTT	40	1	2
MIR398c	+	2116	GTTACCGTGGGGAGTATCTTGGCCGTAGAGGAGAACGAGG	40	1	1
MIR398c	+	2138	CCGTAGAGGAGAACGAGGACGGCCGTTGTAACCTGAAAAA	40	1	1
MIR398c	+	2192	AAGGACACGCGCCAGGCGACGGCGCGTGGAAGGAATTCGG	40	1	3
MIR398c	+	2197	CACGCGCCAGGCGACGGCGCGTGGAAGGAATTCGGCTATG	40	1	1
MIR398c	+	2199	CGCGCCAGGCGACGGCGCGTGGAAGGAATTCGGCTATGGT	40	1	2
MIR398c	+	2201	CGCCAGGCGACGGCGCGTGGAAGGAATTCGGCTATGGTGG	40	1	1
MIR398c	+	2219	GGAAGGAATTCGGCTATGGTGGAGTATATGAGAGGCATAA	40	1	1
MIR398c	+	2225	AATTCGGCTATGGTGGAGTATATGAGAGGCATAAGGAGCT	40	1	1
MIR398c	+	2233	TATGGTGGAGTATATGAGAGGCATAAGGAGCTGAGAGATA	40	1	4
MIR398c	+	2243	TATATGAGAGGCATAAGGAGCTGAGAGATACCGGCGCCGA	40	1	2
MIR398c	+	2249	AGAGGCATAAGGAGCTGAGAGATACCGGCGCCGACGTTAG	40	1	1
MIR398c	+	2259	GGAGCTGAGAGATACCGGCGCCGACGTTAGCCCAACCGGC	40	1	1
MIR398c	+	2263	CTGAGAGATACCGGCGCCGACGTTAGCCCAACCGGCTGAG	40	1	1
MIR398c	+	2271	TACCGGCGCCGACGTTAGCCCAACCGGCTGAGACACCGTT	40	1	3
MIR398c	+	2272	ACCGGCGCCGACGTTAGCCCAACCGGCTGAGACACCGTTA	40	1	2
MIR398c	+	2274	CGGCGCCGACGTTAGCCCAACCGGCTGAGACACCGTTAGC	40	1	1
MIR398c	+	2278	GCCGACGTTAGCCCAACCGGCTGAGACACCGTTAGCGAGA	40	1	1
MIR398c	+	2279	CCGACGTTAGCCCAACCGGCTGAGACACCGTTAGCGAGAC	40	1	1
MIR398c	+	2285	TTAGCCCAACCGGCTGAGACACCGTTAGCGAGACCAATGA	40	1	1
MIR398c	+	2292	AACCGGCTGAGACACCGTTAGCGAGACCAATGACGTTACC	40	1	1
MIR398c	+	2293	ACCGGCTGAGACACCGTTAGCGAGACCAATGACGTTACCG	40	1	1
MIR398c	+	2303	ACACCGTTAGCGAGACCAATGACGTTACCGGAGAACATGG	40	1	1
MIR398c	+	2304	CACCGTTAGCGAGACCAATGACGTTACCGGAGAACATGGA	40	1	1
MIR398c	+	2305	ACCGTTAGCGAGACCAATGACGTTACCGGAGAACATGGAG	40	1	1
MIR398c	+	2312	GCGAGACCAATGACGTTACCGGAGAACATGGAGGACATCC	40	1	1
MIR398c	+	2325	CGTTACCGGAGAACATGGAGGACATCCAGTATTGATTGGC	40	1	1
MIR398c	+	2326	GTTACCGGAGAACATGGAGGACATCCAGTATTGATTGGCT	40	1	2
MIR398c	+	2327	TTACCGGAGAACATGGAGGACATCCAGTATTGATTGGCTA	40	1	2
MIR398c	+	2328	TACCGGAGAACATGGAGGACATCCAGTATTGATTGGCTAC	40	1	1
MIR398c	+	2330	CCGGAGAACATGGAGGACATCCAGTATTGATTGGCTACGA	40	1	1
MIR398c	+	2333	GAGAACATGGAGGACATCCAGTATTGATTGGCTACGAAAT	40	1	1
MIR398c	+	2334	AGAACATGGAGGACATCCAGTATTGATTGGCTACGAAATT	40	1	1
MIR398c	+	2347	CATCCAGTATTGATTGGCTACGAAATTAGCGAGCGAGAAG	40	1	1
MIR398c	+	2351	CAGTATTGATTGGCTACGAAATTAGCGAGCGAGAAGCCGA	40	1	1
MIR398c	+	2353	GTATTGATTGGCTACGAAATTAGCGAGCGAGAAGCCGACG	40	1	1
MIR398c	+	2354	TATTGATTGGCTACGAAATTAGCGAGCGAGAAGCCGACGA	40	1	1
MIR398c	+	2362	GGCTACGAAATTAGCGAGCGAGAAGCCGACGAAGAAACGG	40	1	6
MIR398c	+	2363	GCTACGAAATTAGCGAGCGAGAAGCCGACGAAGAAACGGA	40	1	6
MIR398c	+	2365	TACGAAATTAGCGAGCGAGAAGCCGACGAAGAAACGGACG	40	1	1
MIR398c	+	2366	ACGAAATTAGCGAGCGAGAAGCCGACGAAGAAACGGACGA	40	1	2
MIR398c	+	2370	AATTAGCGAGCGAGAAGCCGACGAAGAAACGGACGAGGAT	40	1	1
MIR398c	+	2373	TAGCGAGCGAGAAGCCGACGAAGAAACGGACGAGGATGAA	40	1	2
MIR398c	+	2374	AGCGAGCGAGAAGCCGACGAAGAAACGGACGAGGATGAAG	40	1	2
MIR398c	+	2375	GCGAGCGAGAAGCCGACGAAGAAACGGACGAGGATGAAGG	40	1	1
MIR398c	+	2376	CGAGCGAGAAGCCGACGAAGAAACGGACGAGGATGAAGGA	40	1	1
MIR398c	+	2378	AGCGAGAAGCCGACGAAGAAACGGACGAGGATGAAGGACG	40	1	2
MIR398c	+	2379	GCGAGAAGCCGACGAAGAAACGGACGAGGATGAAGGACGT	40	1	4
MIR398c	+	2381	GAGAAGCCGACGAAGAAACGGACGAGGATGAAGGACGTCG	40	1	3
MIR398c	+	2382	AGAAGCCGACGAAGAAACGGACGAGGATGAAGGACGTCGG	40	1	2
MIR398c	+	2384	AAGCCGACGAAGAAACGGACGAGGATGAAGGACGTCGGAG	40	1	2
MIR398c	+	2385	AGCCGACGAAGAAACGGACGAGGATGAAGGACGTCGGAGA	40	1	3
MIR398c	+	2386	GCCGACGAAGAAACGGACGAGGATGAAGGACGTCGGAGAG	40	1	4
MIR398c	+	2387	CCGACGAAGAAACGGACGAGGATGAAGGACGTCGGAGAGG	40	1	2
MIR398c	+	2392	GAAGAAACGGACGAGGATGAAGGACGTCGGAGAGGAGACG	40	1	1
MIR398c	+	2394	AGAAACGGACGAGGATGAAGGACGTCGGAGAGGAGACGAG	40	1	1
MIR398c	+	2397	AACGGACGAGGATGAAGGACGTCGGAGAGGAGACGAGTGA	40	1	1
MIR398c	+	2398	ACGGACGAGGATGAAGGACGTCGGAGAGGAGACGAGTGAG	40	1	1
MIR398c	+	2402	ACGAGGATGAAGGACGTCGGAGAGGAGACGAGTGAGGCGG	40	1	1
MIR398c	+	2410	GAAGGACGTCGGAGAGGAGACGAGTGAGGCGGAGAGGATT	40	1	1
MIR398c	+	2412	AGGACGTCGGAGAGGAGACGAGTGAGGCGGAGAGGATTAC	40	1	1
MIR398c	+	2415	ACGTCGGAGAGGAGACGAGTGAGGCGGAGAGGATTACAGG	40	1	1
MIR398c	+	2421	GAGAGGAGACGAGTGAGGCGGAGAGGATTACAGGAGCGGT	40	1	1
MIR398c	+	2423	GAGGAGACGAGTGAGGCGGAGAGGATTACAGGAGCGGTGA	40	1	1
MIR398c	+	2424	AGGAGACGAGTGAGGCGGAGAGGATTACAGGAGCGGTGAG	40	1	1
MIR398c	+	2426	GAGACGAGTGAGGCGGAGAGGATTACAGGAGCGGTGAGAA	40	1	2
MIR398c	+	2429	ACGAGTGAGGCGGAGAGGATTACAGGAGCGGTGAGAAAAG	40	1	1
MIR398c	+	2430	CGAGTGAGGCGGAGAGGATTACAGGAGCGGTGAGAAAAGA	40	1	1
MIR398c	+	2434	TGAGGCGGAGAGGATTACAGGAGCGGTGAGAAAAGAGAGA	40	1	2
MIR398c	+	2435	GAGGCGGAGAGGATTACAGGAGCGGTGAGAAAAGAGAGAA	40	1	1
MIR398c	+	2436	AGGCGGAGAGGATTACAGGAGCGGTGAGAAAAGAGAGAAT	40	1	1
MIR398c	+	2441	GAGAGGATTACAGGAGCGGTGAGAAAAGAGAGAATCGCTG	40	1	1
MIR398c	+	2448	TTACAGGAGCGGTGAGAAAAGAGAGAATCGCTGAGGAAGT	40	1	1
MIR398c	+	2450	ACAGGAGCGGTGAGAAAAGAGAGAATCGCTGAGGAAGTAC	40	1	1
MIR398c	+	2451	CAGGAGCGGTGAGAAAAGAGAGAATCGCTGAGGAAGTACG	40	1	1
MIR398c	+	2458	GGTGAGAAAAGAGAGAATCGCTGAGGAAGTACGTGGTCCG	40	1	1
MIR398c	+	2462	AGAAAAGAGAGAATCGCTGAGGAAGTACGTGGTCCGATGA	40	1	1
MIR398c	+	2467	AGAGAGAATCGCTGAGGAAGTACGTGGTCCGATGAGATCA	40	1	1
MIR398c	+	2468	GAGAGAATCGCTGAGGAAGTACGTGGTCCGATGAGATCAC	40	1	1
MIR398c	+	2472	GAATCGCTGAGGAAGTACGTGGTCCGATGAGATCACAGAG	40	1	3
MIR398c	+	2475	TCGCTGAGGAAGTACGTGGTCCGATGAGATCACAGAGTGG	40	1	1
MIR398c	+	2477	GCTGAGGAAGTACGTGGTCCGATGAGATCACAGAGTGGTC	40	1	1
MIR398c	+	2478	CTGAGGAAGTACGTGGTCCGATGAGATCACAGAGTGGTCC	40	1	2
MIR398c	+	2479	TGAGGAAGTACGTGGTCCGATGAGATCACAGAGTGGTCCC	40	1	4
MIR398c	+	2480	GAGGAAGTACGTGGTCCGATGAGATCACAGAGTGGTCCCA	40	1	1
MIR398c	+	2485	AGTACGTGGTCCGATGAGATCACAGAGTGGTCCCATAGCG	40	1	1
MIR398c	+	2486	GTACGTGGTCCGATGAGATCACAGAGTGGTCCCATAGCGA	40	1	2
MIR398c	+	2487	TACGTGGTCCGATGAGATCACAGAGTGGTCCCATAGCGAG	40	1	1
MIR398c	+	2488	ACGTGGTCCGATGAGATCACAGAGTGGTCCCATAGCGAGG	40	1	4
MIR398c	+	2489	CGTGGTCCGATGAGATCACAGAGTGGTCCCATAGCGAGGC	40	1	2
MIR398c	+	2492	GGTCCGATGAGATCACAGAGTGGTCCCATAGCGAGGCGAG	40	1	2
MIR398c	+	2494	TCCGATGAGATCACAGAGTGGTCCCATAGCGAGGCGAGAG	40	1	3
MIR398c	+	2497	GATGAGATCACAGAGTGGTCCCATAGCGAGGCGAGAGAAG	40	1	1
MIR398c	+	2500	GAGATCACAGAGTGGTCCCATAGCGAGGCGAGAGAAGATG	40	1	1
MIR398c	+	2502	GATCACAGAGTGGTCCCATAGCGAGGCGAGAGAAGATGGA	40	1	1
MIR398c	+	2503	ATCACAGAGTGGTCCCATAGCGAGGCGAGAGAAGATGGAG	40	1	1
MIR398c	+	2505	CACAGAGTGGTCCCATAGCGAGGCGAGAGAAGATGGAGCC	40	1	3
MIR398c	+	2506	ACAGAGTGGTCCCATAGCGAGGCGAGAGAAGATGGAGCCA	40	1	1
MIR398c	+	2508	AGAGTGGTCCCATAGCGAGGCGAGAGAAGATGGAGCCAGC	40	1	1
MIR398c	+	2510	AGTGGTCCCATAGCGAGGCGAGAGAAGATGGAGCCAGCGA	40	1	1
MIR398c	+	2512	TGGTCCCATAGCGAGGCGAGAGAAGATGGAGCCAGCGAAG	40	1	2
MIR398c	+	2514	GTCCCATAGCGAGGCGAGAGAAGATGGAGCCAGCGAAGGA	40	1	2
MIR398c	+	2515	TCCCATAGCGAGGCGAGAGAAGATGGAGCCAGCGAAGGAA	40	1	7
MIR398c	+	2516	CCCATAGCGAGGCGAGAGAAGATGGAGCCAGCGAAGGAAG	40	1	2
MIR398c	+	2517	CCATAGCGAGGCGAGAGAAGATGGAGCCAGCGAAGGAAGC	40	1	4
MIR398c	+	2518	CATAGCGAGGCGAGAGAAGATGGAGCCAGCGAAGGAAGCG	40	1	1
MIR398c	+	2519	ATAGCGAGGCGAGAGAAGATGGAGCCAGCGAAGGAAGCGA	40	1	4
MIR398c	+	2520	TAGCGAGGCGAGAGAAGATGGAGCCAGCGAAGGAAGCGAT	40	1	1
MIR398c	+	2521	AGCGAGGCGAGAGAAGATGGAGCCAGCGAAGGAAGCGATT	40	1	1
MIR398c	+	2523	CGAGGCGAGAGAAGATGGAGCCAGCGAAGGAAGCGATTCC	40	1	3
MIR398c	+	2526	GGCGAGAGAAGATGGAGCCAGCGAAGGAAGCGATTCCGGC	40	1	3
MIR398c	+	2527	GCGAGAGAAGATGGAGCCAGCGAAGGAAGCGATTCCGGCG	40	1	1
MIR398c	+	2528	CGAGAGAAGATGGAGCCAGCGAAGGAAGCGATTCCGGCGG	40	1	4
MIR398c	+	2529	GAGAGAAGATGGAGCCAGCGAAGGAAGCGATTCCGGCGGC	40	1	4
MIR398c	+	2530	AGAGAAGATGGAGCCAGCGAAGGAAGCGATTCCGGCGGCG	40	1	2
MIR398c	+	2532	AGAAGATGGAGCCAGCGAAGGAAGCGATTCCGGCGGCGGA	40	1	1
MIR398c	+	2533	GAAGATGGAGCCAGCGAAGGAAGCGATTCCGGCGGCGGAT	40	1	2
MIR398c	+	2534	AAGATGGAGCCAGCGAAGGAAGCGATTCCGGCGGCGGATA	40	1	2
MIR398c	+	2536	GATGGAGCCAGCGAAGGAAGCGATTCCGGCGGCGGATACG	40	1	3
MIR398c	+	2537	ATGGAGCCAGCGAAGGAAGCGATTCCGGCGGCGGATACGG	40	1	2
MIR398c	+	2538	TGGAGCCAGCGAAGGAAGCGATTCCGGCGGCGGATACGGT	40	1	2
MIR398c	+	2543	CCAGCGAAGGAAGCGATTCCGGCGGCGGATACGGTGGAGG	40	1	2
MIR398c	+	2545	AGCGAAGGAAGCGATTCCGGCGGCGGATACGGTGGAGGCA	40	1	1
MIR398c	+	2547	CGAAGGAAGCGATTCCGGCGGCGGATACGGTGGAGGCAGA	40	1	1
MIR398c	+	2563	GGCGGCGGATACGGTGGAGGCAGAGAGGTTGAGGTCGGAG	40	1	1
MIR398c	+	2566	GGCGGATACGGTGGAGGCAGAGAGGTTGAGGTCGGAGGAG	40	1	1
MIR398c	+	2568	CGGATACGGTGGAGGCAGAGAGGTTGAGGTCGGAGGAGAT	40	1	1
MIR398c	+	2571	ATACGGTGGAGGCAGAGAGGTTGAGGTCGGAGGAGATGAC	40	1	2
MIR398c	+	2572	TACGGTGGAGGCAGAGAGGTTGAGGTCGGAGGAGATGACG	40	1	5
MIR398c	+	2573	ACGGTGGAGGCAGAGAGGTTGAGGTCGGAGGAGATGACGG	40	1	1
MIR398c	+	2576	GTGGAGGCAGAGAGGTTGAGGTCGGAGGAGATGACGGGGA	40	1	3
MIR398c	+	2577	TGGAGGCAGAGAGGTTGAGGTCGGAGGAGATGACGGGGAC	40	1	5
MIR398c	+	2578	GGAGGCAGAGAGGTTGAGGTCGGAGGAGATGACGGGGACC	40	1	1
MIR398c	+	2581	GGCAGAGAGGTTGAGGTCGGAGGAGATGACGGGGACCAGA	40	1	2
MIR398c	+	2582	GCAGAGAGGTTGAGGTCGGAGGAGATGACGGGGACCAGAG	40	1	1
MIR398c	+	2583	CAGAGAGGTTGAGGTCGGAGGAGATGACGGGGACCAGAGG	40	1	1
MIR398c	+	2584	AGAGAGGTTGAGGTCGGAGGAGATGACGGGGACCAGAGGA	40	1	1
MIR398c	+	2585	GAGAGGTTGAGGTCGGAGGAGATGACGGGGACCAGAGGAG	40	1	3
MIR398c	+	2586	AGAGGTTGAGGTCGGAGGAGATGACGGGGACCAGAGGAGG	40	1	2
MIR398c	+	2589	GGTTGAGGTCGGAGGAGATGACGGGGACCAGAGGAGGGAT	40	1	2
MIR398c	+	2591	TTGAGGTCGGAGGAGATGACGGGGACCAGAGGAGGGATGG	40	1	3
MIR398c	+	2592	TGAGGTCGGAGGAGATGACGGGGACCAGAGGAGGGATGGA	40	1	8
MIR398c	+	2593	GAGGTCGGAGGAGATGACGGGGACCAGAGGAGGGATGGAG	40	1	2
MIR398c	+	2595	GGTCGGAGGAGATGACGGGGACCAGAGGAGGGATGGAGAA	40	1	2
MIR398c	+	2597	TCGGAGGAGATGACGGGGACCAGAGGAGGGATGGAGAAGG	40	1	2
MIR398c	+	2599	GGAGGAGATGACGGGGACCAGAGGAGGGATGGAGAAGGTG	40	1	3
MIR398c	+	2601	AGGAGATGACGGGGACCAGAGGAGGGATGGAGAAGGTGGA	40	1	4
MIR398c	+	2603	GAGATGACGGGGACCAGAGGAGGGATGGAGAAGGTGGAGA	40	1	1
MIR398c	+	2604	AGATGACGGGGACCAGAGGAGGGATGGAGAAGGTGGAGAA	40	1	1
MIR398c	+	2606	ATGACGGGGACCAGAGGAGGGATGGAGAAGGTGGAGAAGA	40	1	1
MIR398c	+	2609	ACGGGGACCAGAGGAGGGATGGAGAAGGTGGAGAAGAAGC	40	1	1
MIR398c	+	2610	CGGGGACCAGAGGAGGGATGGAGAAGGTGGAGAAGAAGCA	40	1	3
MIR398c	+	2612	GGGACCAGAGGAGGGATGGAGAAGGTGGAGAAGAAGCATG	40	1	1
MIR398c	+	2615	ACCAGAGGAGGGATGGAGAAGGTGGAGAAGAAGCATGAGA	40	1	5
MIR398c	+	2616	CCAGAGGAGGGATGGAGAAGGTGGAGAAGAAGCATGAGAA	40	1	1
MIR398c	+	2635	GGTGGAGAAGAAGCATGAGAAGAGTGAGAGCCAAGCTAGG	40	1	1
MIR398c	+	2659	TGAGAGCCAAGCTAGGTGAAAGGCTCGTGAGTGTGGCGAG	40	2	2
MIR398c	+	2666	CAAGCTAGGTGAAAGGCTCGTGAGTGTGGCGAGGAGAGAG	40	1	1
MIR398c	+	2689	GTGTGGCGAGGAGAGAGAGAATGGTCGGAAGACGGTGGCT	40	1	1
MIR398c	+	2701	GAGAGAGAATGGTCGGAAGACGGTGGCTCGACCATCGGAA	40	1	1
MIR398c	+	2762	GAAAACGACGGCGGTTTGGTGTTGCGTTGAGATGGCTCCA	40	1	2
MIR398c	+	2774	GGTTTGGTGTTGCGTTGAGATGGCTCCATTACTCTCGGAG	40	1	1
MIR398c	+	2777	TTGGTGTTGCGTTGAGATGGCTCCATTACTCTCGGAGAAG	40	1	3
MIR398c	+	2780	GTGTTGCGTTGAGATGGCTCCATTACTCTCGGAGAAGAAA	40	1	1
MIR398c	+	2793	ATGGCTCCATTACTCTCGGAGAAGAAAACTCGCTGACGAC	40	1	1
MIR398c	+	2822	TCGCTGACGACTCTTACTTACACGACCACCCAATCAATGA	40	1	1
MIR398c	+	2876	TTTAAATCTTTCATGAACAATAAAATGACTCAGAGGCAAA	40	1	1
MIR398c	+	2985	GTTCCTCGTCTCTTGGCTTAAATTAATTTTTGACGTCAAT	40	1	1
MIR398c	+	2995	TCTTGGCTTAAATTAATTTTTGACGTCAATTGTTGAAATG	40	1	1
MIR398c	+	3023	ATTGTTGAAATGAATTTGTAATTTAGAAGAAAATATATTC	40	1	1
MIR398c	+	3032	ATGAATTTGTAATTTAGAAGAAAATATATTCGGACAAATA	40	1	1
MIR398c	+	3054	AATATATTCGGACAAATAATATCTATCAAGAATGCCATTG	40	1	1
MIR398c	+	3058	TATTCGGACAAATAATATCTATCAAGAATGCCATTGGGAT	40	1	1
MIR398c	+	3187	CGCACCTTTCAGACGTCAGTTACTAAGACACTAAACAATA	40	1	1
MIR398c	+	3191	CCTTTCAGACGTCAGTTACTAAGACACTAAACAATACAAT	40	1	1
MIR398c	+	3193	TTTCAGACGTCAGTTACTAAGACACTAAACAATACAATCC	40	1	1
MIR398c	+	3194	TTCAGACGTCAGTTACTAAGACACTAAACAATACAATCCA	40	1	1
MIR398c	+	3197	AGACGTCAGTTACTAAGACACTAAACAATACAATCCACTT	40	1	1
MIR398c	+	3198	GACGTCAGTTACTAAGACACTAAACAATACAATCCACTTT	40	1	1
MIR399a	+	917	AATCACAAAAGAATAAAACTAAA	23	1	4
MIR399a	+	918	ATCACAAAAGAATAAAACTAAA	22	1	5
MIR399a	+	919	TCACAAAAGAATAAAACTAAA	21	1	2
MIR399a	+	920	CACAAAAGAATAAAACTAA	19	1	1
MIR399a	+	920	CACAAAAGAATAAAACTAAA	20	1	22
MIR399a	+	921	ACAAAAGAATAAAACTAAA	19	1	119
MIR399a	+	921	ACAAAAGAATAAAACTAA	18	1	2
MIR399a	+	922	CAAAAGAATAAAACTAAA	18	1	2
MIR399b	+	1307	TGCCCTGAAACTGGTTCAGCTTAATTAAACACATGAAAGA	40	1	2
MIR399b	+	1312	TGAAACTGGTTCAGCTTAATTAAACACATGAAAGAGAGAA	40	1	4
MIR399b	+	1314	AAACTGGTTCAGCTTAATTAAACACATGAAAGAGAGAAGA	40	1	7
MIR399b	+	1317	CTGGTTCAGCTTAATTAAACACATGAAAGAGAGAAGAAAT	40	1	2
MIR399b	+	1338	CATGAAAGAGAGAAGAAATCAAAGGTA	27	1	1
MIR399b	+	1339	ATGAAAGAGAGAAGAAATCAAAGGTA	26	1	9
MIR399b	+	1340	TGAAAGAGAGAAGAAATCAAAGGTA	25	1	8
MIR399b	+	1341	GAAAGAGAGAAGAAATCAAAGGTA	24	1	52
MIR399b	+	1341	GAAAGAGAGAAGAAATCAAAGGT	23	1	1
MIR399b	+	1342	AAAGAGAGAAGAAATCAAAGGTA	23	1	211
MIR399b	+	1343	AAGAGAGAAGAAATCAAAGGTA	22	1	347
MIR399b	+	1343	AAGAGAGAAGAAATCAAAGGT	21	1	2
MIR399b	+	1344	AGAGAGAAGAAATCAAAGGTA	21	1	1203
MIR399b	+	1344	AGAGAGAAGAAATCAAAGGT	20	1	3
MIR399b	+	1345	GAGAGAAGAAATCAAAGGTA	20	1	1503
MIR399b	+	1345	GAGAGAAGAAATCAAAGGT	19	1	6
MIR399b	+	1346	AGAGAAGAAATCAAAGGTA	19	1	18
MIR399c	+	985	CTGTCACTGCTTCCGCTTAAACACAGTCTATAACCGGTTC	40	1	1
MIR399c	+	988	TCACTGCTTCCGCTTAAACACAGTCTATAACCGGTTCTGC	40	1	15
MIR399c	+	989	CACTGCTTCCGCTTAAACACAGTCTATAACCGGTTCTGCT	40	1	1
MIR399c	+	995	TTCCGCTTAAACACAGTCTATAACCGGTTCTGCTAATATC	40	1	1
MIR399c	+	1014	ATAACCGGTTCTGCTAATATCAATC	25	1	1
MIR399c	+	1016	AACCGGTTCTGCTAATATCAATC	23	1	2
MIR399c	+	1017	ACCGGTTCTGCTAATATCAATCC	23	1	1
MIR399c	+	1017	ACCGGTTCTGCTAATATCAATC	22	1	36
MIR399c	+	1018	CCGGTTCTGCTAATATCAATC	21	1	70
MIR399c	+	1019	CGGTTCTGCTAATATCAAT	19	1	3
MIR399c	+	1019	CGGTTCTGCTAATATCAATC	20	1	616
MIR399c	+	1019	CGGTTCTGCTAATATCAATCC	21	1	2
MIR399c	+	1020	GGTTCTGCTAATATCAAT	18	1	325
MIR399c	+	1020	GGTTCTGCTAATATCAATC	19	1	78648
MIR399c	+	1020	GGTTCTGCTAATATCAATCC	20	1	582
MIR399c	+	1020	GGTTCTGCTAATATCAATCCT	21	1	1
MIR399c	+	1021	GTTCTGCTAATATCAATC	18	1	19
MIR399c	+	1076	AGAGAATTGGTCTCTCTGGCTACAAAACTAGTGCGGTTCT	40	1	1
MIR399d	+	513	CAATTCATCCCATGCAAAACAATATATCTTTCTTTATAGT	40	1	1
MIR399d	+	539	TCTTTCTTTATAGTCTCTAGGCAAT	25	1	2
MIR399d	+	541	TTTCTTTATAGTCTCTAGGCAAT	23	1	1
MIR399d	+	542	TTCTTTATAGTCTCTAGGCAAT	22	1	2
MIR399d	+	543	TCTTTATAGTCTCTAGGCAAT	21	1	5
MIR399d	+	544	CTTTATAGTCTCTAGGCAAT	20	1	91
MIR399d	+	545	TTTATAGTCTCTAGGCAA	18	1	1
MIR399d	+	545	TTTATAGTCTCTAGGCAAT	19	1	186
MIR399d	+	546	TTATAGTCTCTAGGCAAT	18	1	17
MIR399f	+	550	TTCATTTCTCCAATATCCAAATCTAGT	27	1	1
MIR399f	+	553	ATTTCTCCAATATCCAAATCTAG	23	1	1
MIR399f	+	553	ATTTCTCCAATATCCAAATCTAGT	24	1	10
MIR399f	+	554	TTTCTCCAATATCCAAATCTAGT	23	1	15
MIR399f	+	554	TTTCTCCAATATCCAAATCTAG	22	1	1
MIR399f	+	555	TTCTCCAATATCCAAATCTAGT	22	1	41
MIR399f	+	555	TTCTCCAATATCCAAATCTAG	21	1	5
MIR399f	+	556	TCTCCAATATCCAAATCTAGT	21	1	114
MIR399f	+	556	TCTCCAATATCCAAATCTA	19	1	1
MIR399f	+	556	TCTCCAATATCCAAATCTAG	20	1	17
MIR399f	+	557	CTCCAATATCCAAATCTAG	19	1	156
MIR399f	+	557	CTCCAATATCCAAATCTA	18	1	5
MIR399f	+	557	CTCCAATATCCAAATCTAGT	20	1	1066
MIR399f	+	558	TCCAATATCCAAATCTAG	18	1	621
MIR399f	+	558	TCCAATATCCAAATCTAGT	19	1	4535
MIR399f	+	559	CCAATATCCAAATCTAGT	18	1	30
MIR399f	+	2025	TAATTCTCTTGCGCCAATGTTTTATATTAATTTGTTGGTT	40	1	2
MIR399f	+	2055	TTTGTTGGTTTTTGGTTAGTAAG	23	1	5
MIR399f	+	2056	TTGTTGGTTTTTGGTTAGTAAG	22	1	17
MIR399f	+	2057	TGTTGGTTTTTGGTTAGTAA	20	1	1
MIR399f	+	2057	TGTTGGTTTTTGGTTAGTAAG	21	1	79
MIR399f	+	2058	GTTGGTTTTTGGTTAGTAA	19	1	18
MIR399f	+	2058	GTTGGTTTTTGGTTAGTAAG	20	1	1457
MIR399f	+	2058	GTTGGTTTTTGGTTAGTA	18	1	1
MIR399f	+	2059	TTGGTTTTTGGTTAGTAAG	19	1	8
MIR399f	+	2060	TGGTTTTTGGTTAGTAAG	18	1	1
MIR400	+	505	GACTTATGATAATCTCATGAATGGATTTTGCAACTCTTAA	40	1	15
MIR400	+	506	ACTTATGATAATCTCATGAATGGATTTTGCAACTCTTAAA	40	1	3
MIR400	+	507	CTTATGATAATCTCATGAATGGATTTTGCAACTCTTAAAG	40	1	2
MIR400	+	508	TTATGATAATCTCATGAATGGATTTTGCAACTCTTAAAGA	40	1	1
MIR400	+	513	ATAATCTCATGAATGGATTTTGCAACTCTTAAAGAGAGCA	40	1	2
MIR400	+	526	TGGATTTTGCAACTCTTAAAGAGAGCATAGTTCTTGTGGT	40	1	15
MIR400	+	527	GGATTTTGCAACTCTTAAAGAGAGCATAGTTCTTGTGGTG	40	1	1
MIR400	+	531	TTTGCAACTCTTAAAGAGAGCATAGTTCTTGTGGTGCGGC	40	1	1
MIR400	+	548	GAGCATAGTTCTTGTGGTGCGGCTTCT	27	1	2
MIR400	+	554	AGTTCTTGTGGTGCGGCTT	19	1	1
MIR400	+	554	AGTTCTTGTGGTGCGGCTTCT	21	1	36
MIR400	+	555	GTTCTTGTGGTGCGGCTTCT	20	1	60
MIR400	+	555	GTTCTTGTGGTGCGGCTTC	19	1	1
MIR401	+	996	AGTTTCCTTTTCCTTAGTTTTTGCT	25	1	2
MIR401	+	997	GTTTCCTTTTCCTTAGTTTTTGCT	24	1	6
MIR401	+	998	TTTCCTTTTCCTTAGTTTTTGCT	23	1	26
MIR401	+	999	TTCCTTTTCCTTAGTTTTTGCT	22	1	42
MIR401	+	999	TTCCTTTTCCTTAGTTTTTGC	21	1	2
MIR401	+	1000	TCCTTTTCCTTAGTTTTTGC	20	1	1
MIR401	+	1000	TCCTTTTCCTTAGTTTTTGCT	21	1	50
MIR401	+	1001	CCTTTTCCTTAGTTTTTGC	19	1	2
MIR401	+	1001	CCTTTTCCTTAGTTTTTGCT	20	1	608
MIR401	+	1002	CTTTTCCTTAGTTTTTGCT	19	1	57414
MIR401	+	1002	CTTTTCCTTAGTTTTTGC	18	1	509
MIR401	+	1003	TTTTCCTTAGTTTTTGCT	18	1	182
MIR401	+	1014	TTTTGCTCCAAAATGTCTCC	20	1	2
MIR402	+	457	CCTATTAAACCTCTGTTACATCTGCTTTTTGAAAAGTTGT	40	1	1
MIR402	+	670	ATGCTACTGAAAACTTTATCAAAGAAAA	28	1	4
MIR402	+	677	TGAAAACTTTATCAAAGAAAA	21	1	1
MIR402	+	678	GAAAACTTTATCAAAGAAAA	20	1	3
MIR403	+	1808	TATGTAAGAGATTCTTTAACAATTCCTATAATCTTTGTTG	40	1	1
MIR403	+	1853	TTAGATTCACGCACAAAC	18	1	2
MIR403	+	1874	TAATCTGTCTTTTCGATTTTTACCAGATCTGTCTTCGATT	40	1	5
MIR403	+	1876	ATCTGTCTTTTCGATTTTTACCAGATCTGTCTTCGATTTC	40	1	1
MIR403	+	1878	CTGTCTTTTCGATTTTTACCAGATCTGTCTTCGATTTCGA	40	1	1
MIR403	+	1906	CTTCGATTTCGAATCGATCT	20	1	4
MIR403	+	1907	TTCGATTTCGAATCGATCT	19	1	6
MIR404	+	1344	ATAATTTTCATGTAATTCTTTTATTTAC	28	1	2
MIR404	+	1350	TTCATGTAATTCTTTTATTTAC	22	1	1
MIR404	+	1351	TCATGTAATTCTTTTATTTAC	21	1	1
MIR404	+	1352	CATGTAATTCTTTTATTTA	19	1	1
MIR404	+	1352	CATGTAATTCTTTTATTTAC	20	1	56
MIR404	+	1353	ATGTAATTCTTTTATTTA	18	1	2
MIR404	+	1353	ATGTAATTCTTTTATTTAC	19	1	85
MIR405a	+	1181	AGGGGTGTCAAAATGGGTAACCCA	24	1	1
MIR405a	+	1322	TTGTTAAATGGGTTAACCATTTAAATAATA	30	1	1
MIR405a	+	1328	AATGGGTTAACCATTTAAATAATA	24	1	1
MIR405a	+	1331	GGGTTAACCATTTAAATAATA	21	1	1
MIR405a	+	1332	GGTTAACCATTTAAATAATA	20	1	6
MIR405a	+	2730	TTTTGACCCATTTTGACACCCC	22	1	7
MIR405a	+	2731	TTTGACCCATTTTGACACCCC	21	1	21
MIR405a	+	2732	TTGACCCATTTTGACACCCC	20	1	2
MIR405a	+	2733	TGACCCATTTTGACACCCC	19	1	1
MIR405b	+	306	AAACTCATTTGATTATGAGTTGGGTTGGGTTGGGTTACCC	40	2	1
MIR405b	+	312	ATTTGATTATGAGTTGGGTTGGGTTGGGTTACCCA	35	2	11
MIR405b	+	313	TTTGATTATGAGTTGGGTTGGGTTGGGTTACCCA	34	2	6
MIR405b	+	314	TTGATTATGAGTTGGGTTGGGTTGGGTTACCCA	33	2	3
MIR405b	+	315	TGATTATGAGTTGGGTTGGGTTGGGTTACCCA	32	2	57
MIR405b	+	316	GATTATGAGTTGGGTTGGGTTGGGTTACCCA	31	2	197
MIR405b	+	316	GATTATGAGTTGGGTTGGGTTGGGTTACCC	30	2	2
MIR405b	+	317	ATTATGAGTTGGGTTGGGTTGGGTTACCCA	30	2	313
MIR405b	+	318	TTATGAGTTGGGTTGGGTTGGGTTACCCA	29	2	26
MIR405b	+	319	TATGAGTTGGGTTGGGTTGGGTTACCCA	28	2	218
MIR405b	+	319	TATGAGTTGGGTTGGGTTGGGTTACC	26	2	2
MIR405b	+	320	ATGAGTTGGGTTGGGTTGGGTTACC	25	2	1
MIR405b	+	320	ATGAGTTGGGTTGGGTTGGGTTACCCAT	28	2	1
MIR405b	+	320	ATGAGTTGGGTTGGGTTGGGTTACCC	26	2	10
MIR405b	+	320	ATGAGTTGGGTTGGGTTGGGTTACCCA	27	2	1512
MIR405b	+	321	TGAGTTGGGTTGGGTTGGGTTACCC	25	2	1
MIR405b	+	321	TGAGTTGGGTTGGGTTGGGTTACCCA	26	2	241
MIR405b	+	321	TGAGTTGGGTTGGGTTGGGTTACCCAT	27	2	1
MIR405b	+	321	TGAGTTGGGTTGGGTTGGGTTACC	24	2	1
MIR405b	+	322	GAGTTGGGTTGGGTTGGGTTACCCAT	26	2	3
MIR405b	+	322	GAGTTGGGTTGGGTTGGGTTACCC	24	2	6
MIR405b	+	322	GAGTTGGGTTGGGTTGGGTTACCCA	25	2	1050
MIR405b	+	323	AGTTGGGTTGGGTTGGGTTACCCAT	25	2	1
MIR405b	+	323	AGTTGGGTTGGGTTGGGTTACCC	23	2	1
MIR405b	+	323	AGTTGGGTTGGGTTGGGTTACCCA	24	2	355
MIR405b	+	324	GTTGGGTTGGGTTGGGTTACCCAT	24	2	2
MIR405b	+	324	GTTGGGTTGGGTTGGGTTACCCA	23	2	1849
MIR405b	+	324	GTTGGGTTGGGTTGGGTTACC	21	2	1
MIR405b	+	324	GTTGGGTTGGGTTGGGTTACCC	22	2	6
MIR405b	+	325	TTGGGTTGGGTTGGGTTACCCA	22	2	308
MIR405b	+	325	TTGGGTTGGGTTGGGTTACCC	21	2	1
MIR405b	+	326	TGGGTTGGGTTGGGTTACCCAT	22	2	1
MIR405b	+	326	TGGGTTGGGTTGGGTTACCC	20	2	2
MIR405b	+	326	TGGGTTGGGTTGGGTTACCCA	21	2	695
MIR405b	+	327	GGGTTGGGTTGGGTTACCCA	20	2	4758
MIR405b	+	327	GGGTTGGGTTGGGTTACCC	19	2	15
MIR405b	+	327	GGGTTGGGTTGGGTTACCCAT	21	2	5
MIR405b	+	328	GGTTGGGTTGGGTTACCCA	19	2	66
MIR405b	+	329	GTTGGGTTGGGTTACCCA	18	2	3
MIR405b	+	338	GGTTACCCATTTTGACACCCC	21	2	1
MIR405b	+	340	TTACCCATTTTGACACCCC	19	2	1
MIR405d	+	436	CCATTTAACAACTCAACCCA	20	1	2
MIR405d	+	438	ATTTAACAACTCAACCCA	18	1	2
MIR405d	+	534	AAACTCATTTGATTATGAGTTGGGTTGGGTTGGGTTACCC	40	2	1
MIR405d	+	540	ATTTGATTATGAGTTGGGTTGGGTTGGGTTACCCA	35	2	11
MIR405d	+	541	TTTGATTATGAGTTGGGTTGGGTTGGGTTACCCA	34	2	6
MIR405d	+	542	TTGATTATGAGTTGGGTTGGGTTGGGTTACCCA	33	2	3
MIR405d	+	543	TGATTATGAGTTGGGTTGGGTTGGGTTACCCA	32	2	57
MIR405d	+	544	GATTATGAGTTGGGTTGGGTTGGGTTACCCA	31	2	197
MIR405d	+	544	GATTATGAGTTGGGTTGGGTTGGGTTACCC	30	2	2
MIR405d	+	545	ATTATGAGTTGGGTTGGGTTGGGTTACCCA	30	2	313
MIR405d	+	546	TTATGAGTTGGGTTGGGTTGGGTTACCCA	29	2	26
MIR405d	+	547	TATGAGTTGGGTTGGGTTGGGTTACCCA	28	2	218
MIR405d	+	547	TATGAGTTGGGTTGGGTTGGGTTACC	26	2	2
MIR405d	+	548	ATGAGTTGGGTTGGGTTGGGTTACC	25	2	1
MIR405d	+	548	ATGAGTTGGGTTGGGTTGGGTTACCCAT	28	2	1
MIR405d	+	548	ATGAGTTGGGTTGGGTTGGGTTACCC	26	2	10
MIR405d	+	548	ATGAGTTGGGTTGGGTTGGGTTACCCA	27	2	1512
MIR405d	+	549	TGAGTTGGGTTGGGTTGGGTTACCC	25	2	1
MIR405d	+	549	TGAGTTGGGTTGGGTTGGGTTACCCA	26	2	241
MIR405d	+	549	TGAGTTGGGTTGGGTTGGGTTACCCAT	27	2	1
MIR405d	+	549	TGAGTTGGGTTGGGTTGGGTTACC	24	2	1
MIR405d	+	550	GAGTTGGGTTGGGTTGGGTTACCCAT	26	2	3
MIR405d	+	550	GAGTTGGGTTGGGTTGGGTTACCC	24	2	6
MIR405d	+	550	GAGTTGGGTTGGGTTGGGTTACCCA	25	2	1050
MIR405d	+	551	AGTTGGGTTGGGTTGGGTTACCCAT	25	2	1
MIR405d	+	551	AGTTGGGTTGGGTTGGGTTACCC	23	2	1
MIR405d	+	551	AGTTGGGTTGGGTTGGGTTACCCA	24	2	355
MIR405d	+	552	GTTGGGTTGGGTTGGGTTACCCAT	24	2	2
MIR405d	+	552	GTTGGGTTGGGTTGGGTTACCCA	23	2	1849
MIR405d	+	552	GTTGGGTTGGGTTGGGTTACC	21	2	1
MIR405d	+	552	GTTGGGTTGGGTTGGGTTACCC	22	2	6
MIR405d	+	553	TTGGGTTGGGTTGGGTTACCCA	22	2	308
MIR405d	+	553	TTGGGTTGGGTTGGGTTACCC	21	2	1
MIR405d	+	554	TGGGTTGGGTTGGGTTACCCAT	22	2	1
MIR405d	+	554	TGGGTTGGGTTGGGTTACCC	20	2	2
MIR405d	+	554	TGGGTTGGGTTGGGTTACCCA	21	2	695
MIR405d	+	555	GGGTTGGGTTGGGTTACCCA	20	2	4758
MIR405d	+	555	GGGTTGGGTTGGGTTACCC	19	2	15
MIR405d	+	555	GGGTTGGGTTGGGTTACCCAT	21	2	5
MIR405d	+	556	GGTTGGGTTGGGTTACCCA	19	2	66
MIR405d	+	557	GTTGGGTTGGGTTACCCA	18	2	3
MIR405d	+	566	GGTTACCCATTTTGACACCCC	21	2	1
MIR405d	+	568	TTACCCATTTTGACACCCC	19	2	1
MIR406	+	1060	TAGGCTCTATTTGGCGTGATG	21	1	1
MIR406	+	1397	AAAAATCGATTAACTAAAAAGGATGG	26	1	1
MIR406	+	1398	AAAATCGATTAACTAAAAAGGATGG	25	1	1
MIR406	+	1399	AAATCGATTAACTAAAAAGGATGG	24	1	7
MIR406	+	1400	AATCGATTAACTAAAAAGGATGG	23	1	7
MIR406	+	1401	ATCGATTAACTAAAAAGGATGG	22	1	49
MIR406	+	1402	TCGATTAACTAAAAAGGATGG	21	1	36
MIR406	+	1403	CGATTAACTAAAAAGGATGG	20	1	228
MIR406	+	1404	GATTAACTAAAAAGGATGG	19	1	2285
MIR406	+	1404	GATTAACTAAAAAGGATG	18	1	6
MIR406	+	1405	ATTAACTAAAAAGGATGG	18	1	10
MIR407	+	1014	ATTTTTCATCCCATTTTTCAAAGTTGGCAA	30	1	2
MIR407	+	1015	TTTTTCATCCCATTTTTCAAAGTTGGCAA	29	1	5
MIR407	+	1016	TTTTCATCCCATTTTTCAAAGTTGGCAA	28	1	3
MIR407	+	1017	TTTCATCCCATTTTTCAAAGTTGGCAA	27	1	4
MIR407	+	1018	TTCATCCCATTTTTCAAAGTTGGCAA	26	1	1
MIR407	+	1019	TCATCCCATTTTTCAAAGTTGGCAA	25	1	7
MIR407	+	1020	CATCCCATTTTTCAAAGTTGGCAA	24	1	22
MIR407	+	1021	ATCCCATTTTTCAAAGTTGGCAA	23	1	49
MIR407	+	1022	TCCCATTTTTCAAAGTTGGCAA	22	1	41
MIR407	+	1023	CCCATTTTTCAAAGTTGGCAA	21	1	50
MIR407	+	1024	CCATTTTTCAAAGTTGGCAA	20	1	254
MIR407	+	1024	CCATTTTTCAAAGTTGGCA	19	1	3
MIR407	+	1025	CATTTTTCAAAGTTGGCAA	19	1	856
MIR407	+	1025	CATTTTTCAAAGTTGGCA	18	1	3
MIR407	+	1026	ATTTTTCAAAGTTGGCAA	18	1	1
MIR408	+	599	ACCCATGCACTGCCTCTTCCCTGGCTCCCTCTTTTTTTCT	40	1	1
MIR408	+	603	ATGCACTGCCTCTTCCCTGGCTCCCTCTTTTTTTCTCTAT	40	1	2
MIR408	+	604	TGCACTGCCTCTTCCCTGGCTCCCTCTTTTTTTCTCTATA	40	1	4
MIR408	+	611	CCTCTTCCCTGGCTCCCTCTTTTTTTCTCTATATTTCTCT	40	1	1
MIR408	+	613	TCTTCCCTGGCTCCCTCTTTTTTTCTCTATATTTCTCTCT	40	1	2
MIR408	+	617	CCCTGGCTCCCTCTTTTTTTCTCTATATTTCTCTCTCTCC	40	1	3
MIR408	+	621	GGCTCCCTCTTTTTTTCTCTATATTTCTCTCTCTCCTTTC	40	1	1
MIR408	+	624	TCCCTCTTTTTTTCTCTATATTTCTCTCTCTCCTTTCATT	40	1	173
MIR408	+	625	CCCTCTTTTTTTCTCTATATTTCTCTCTCTCCTTTCATTT	40	1	132
MIR408	+	626	CCTCTTTTTTTCTCTATATTTCTCTCTCTCCTTTCATTTC	40	1	54
MIR408	+	627	CTCTTTTTTTCTCTATATTTCTCTCTCTCCTTTCATTTCA	40	1	7
MIR408	+	628	TCTTTTTTTCTCTATATTTCTCTCTCTCCTTTCATTTCAC	40	1	10
MIR408	+	632	TTTTTCTCTATATTTCTCTCTCTCCTTTCATTTCACAGCT	40	1	1
MIR408	+	634	TTTCTCTATATTTCTCTCTCTCCTTTCATTTCACAGCTTT	40	1	1
MIR408	+	635	TTCTCTATATTTCTCTCTCTCCTTTCATTTCACAGCTTTC	40	1	1
MIR408	+	646	TCTCTCTCTCCTTTCATTTCACAGCTTTC	29	1	2
MIR408	+	647	CTCTCTCTCCTTTCATTTCACAGCTTTC	28	1	3
MIR408	+	648	TCTCTCTCCTTTCATTTCACAGCTTTC	27	1	1
MIR408	+	651	CTCTCCTTTCATTTCACAGCTTTC	24	1	4
MIR408	+	652	TCTCCTTTCATTTCACAGCTTTC	23	1	5
MIR408	+	653	CTCCTTTCATTTCACAGCTTTC	22	1	11
MIR408	+	654	TCCTTTCATTTCACAGCTTTC	21	1	44
MIR408	+	655	CCTTTCATTTCACAGCTT	18	1	1
MIR408	+	655	CCTTTCATTTCACAGCTTTC	20	1	317
MIR408	+	656	CTTTCATTTCACAGCTTTC	19	1	2719
MIR408	+	656	CTTTCATTTCACAGCTTT	18	1	12
MIR408	+	657	TTTCATTTCACAGCTTTC	18	1	9
MIR408	+	1002	TGAGAAAAAGATTTGTTGATTTGATATGTACCTGATCTGA	40	1	1
MIR408	+	1026	TATGTACCTGATCTGACCGTAGCTTTGATCGACTGCTCTG	40	1	2
MIR408	+	1028	TGTACCTGATCTGACCGTAGCTTTGATCGACTGCTCTGTA	40	1	3
MIR408	+	1029	GTACCTGATCTGACCGTAGCTTTGATCGACTGCTCTGTAT	40	1	2
MIR408	+	1030	TACCTGATCTGACCGTAGCTTTGATCGACTGCTCTGTATT	40	1	1
MIR408	+	1075	CCTTTCGATTTCATATAGCCTTGCACATAGTACTTTAAGT	40	1	1
MIR408	+	1089	ATAGCCTTGCACATAGTACTTTAAGTGCTTTGGCTCTGTT	40	1	2
MIR408	+	1090	TAGCCTTGCACATAGTACTTTAAGTGCTTTGGCTCTGTTC	40	1	1
MIR408	+	1095	TTGCACATAGTACTTTAAGTGCTTTGGCTCTGTTCTGTTA	40	1	1
MIR408	+	1104	GTACTTTAAGTGCTTTGGCTCTGTTCTGTTACAAAGATAT	40	1	3
MIR408	+	1118	TTGGCTCTGTTCTGTTACAAAGATATTAAATTTTTCAGTA	40	1	2
MIR408	+	1277	CTGCGCTGTTTGTTGTGTTGGCGTGTTGACCGCCTGAGCC	40	1	1
MIR408	+	1279	GCGCTGTTTGTTGTGTTGGCGTGTTGACCGCCTGAGCCAC	40	1	1
MIR413	+	952	CTGGAATGATTGTATACGATCCTCCTGAGGATATATGTGA	40	1	1
MIR413	+	1189	TTCAGGTTAGATCAAGTGGGAAAACAAATGGAAGATTGTG	40	1	1
MIR413	+	1280	TTGAAAACTGAAGATGATGAGGAGCAT	27	1	2
MIR413	+	1280	TTGAAAACTGAAGATGATGAGGAGCA	26	1	1
MIR413	+	1281	TGAAAACTGAAGATGATGAGGAGCAT	26	1	1
MIR413	+	1282	GAAAACTGAAGATGATGAGGAGCAT	25	1	1
MIR413	+	1283	AAAACTGAAGATGATGAGGAGCAT	24	1	9
MIR413	+	1284	AAACTGAAGATGATGAGGAGCAT	23	1	35
MIR413	+	1285	AACTGAAGATGATGAGGAGCA	21	1	1
MIR413	+	1285	AACTGAAGATGATGAGGAGCAT	22	1	68
MIR413	+	1286	ACTGAAGATGATGAGGAGCAT	21	1	194
MIR413	+	1287	CTGAAGATGATGAGGAGCA	19	1	11
MIR413	+	1287	CTGAAGATGATGAGGAGCAT	20	1	1540
MIR413	+	1288	TGAAGATGATGAGGAGCA	18	1	122
MIR413	+	1288	TGAAGATGATGAGGAGCAT	19	1	13004
MIR413	+	1289	GAAGATGATGAGGAGCAT	18	1	610
MIR414	+	1454	AAGGTCACGAGACTCACATAGCTTCACAAGTCACACAACC	40	1	1
MIR414	+	1469	ACATAGCTTCACAAGTCACACAACCTTTGACATCAGCCTC	40	1	1
MIR414	+	1886	GGCTTGAAGTCGAAGATAAAGACTGGTCTAAGGATGCGGA	40	1	1
MIR414	+	1914	TAAGGATGCGGAAGAGATCATCATTATCATCATCA	35	1	1
MIR414	+	1936	ATTATCATCATCATCATATTCATCTTCATCATCATCGTCA	40	1	1
MIR414	+	1944	CATCATCATATTCATCTTCATCATCATCGTCATCATCATC	40	1	1
MIR414	+	1945	ATCATCATATTCATCTTCATCATCATCGTCATCATCATCA	40	1	1
MIR414	+	1947	CATCATATTCATCTTCATCATCATCGTCATCATCATCATC	40	1	1
MIR414	+	1961	TCATCATCATCGTCATCATCATCATCATCA	30	1	1
MIR414	+	1965	CATCATCGTCATCATCATCATCATCA	26	1	1
MIR414	+	2003	ATAGAGAAGAGTGAGAGTATGAGATTTGAGTTGAGAAGCA	40	1	1
MIR414	+	2021	ATGAGATTTGAGTTGAGAAGCAAAAAGGCTCACAAAATTA	40	1	1
MIR414	+	2029	TGAGTTGAGAAGCAAAAAGGCTCACAAAATTATCCAAGAA	40	1	1
MIR414	+	2044	AAAGGCTCACAAAATTATCCAAGAA	25	1	1
MIR414	+	2045	AAGGCTCACAAAATTATCCAAGAA	24	1	3
MIR414	+	2046	AGGCTCACAAAATTATCCAAGAA	23	1	1
MIR414	+	2047	GGCTCACAAAATTATCCAAGAA	22	1	1
MIR414	+	2048	GCTCACAAAATTATCCAAGAA	21	1	51
MIR414	+	2049	CTCACAAAATTATCCAAG	18	1	1
MIR414	+	2049	CTCACAAAATTATCCAAGAA	20	1	1252
MIR414	+	2049	CTCACAAAATTATCCAAGA	19	1	6
MIR414	+	2050	TCACAAAATTATCCAAGA	18	1	12
MIR414	+	2050	TCACAAAATTATCCAAGAA	19	1	1931
MIR414	+	2051	CACAAAATTATCCAAGAA	18	1	60
MIR416	+	343	ATGATTTCTGGGTTTCGGCGAAGTTGACATTTGAG	35	1	2
MIR416	+	345	GATTTCTGGGTTTCGGCGAAGTTGACATTTGAG	33	1	5
MIR416	+	346	ATTTCTGGGTTTCGGCGAAGTTGACATTTGAG	32	1	1
MIR416	+	347	TTTCTGGGTTTCGGCGAAGTTGACATTTGAG	31	1	9
MIR416	+	348	TTCTGGGTTTCGGCGAAGTTGACATTTGAG	30	1	4
MIR416	+	349	TCTGGGTTTCGGCGAAGTTGACATTTGAG	29	1	42
MIR416	+	350	CTGGGTTTCGGCGAAGTTGACATTTGAG	28	1	3
MIR416	+	351	TGGGTTTCGGCGAAGTTGACATTTGAG	27	1	20
MIR416	+	352	GGGTTTCGGCGAAGTTGACATTTGAG	26	1	147
MIR416	+	353	GGTTTCGGCGAAGTTGACATTTGAG	25	1	99
MIR416	+	354	GTTTCGGCGAAGTTGACATTTGAG	24	1	20
MIR416	+	355	TTTCGGCGAAGTTGACATTTGAG	23	1	31
MIR416	+	356	TTCGGCGAAGTTGACATTTGAG	22	1	185
MIR416	+	357	TCGGCGAAGTTGACATTTGAG	21	1	551
MIR416	+	357	TCGGCGAAGTTGACATTTGA	20	1	1
MIR416	+	358	CGGCGAAGTTGACATTTGA	19	1	153
MIR416	+	358	CGGCGAAGTTGACATTTGAG	20	1	52711
MIR416	+	358	CGGCGAAGTTGACATTTG	18	1	8
MIR416	+	359	GGCGAAGTTGACATTTGAG	19	1	85253
MIR416	+	359	GGCGAAGTTGACATTTGA	18	1	200
[truncated: 1,214 more rows]

## Sheet: Wild type
MIRNA_Precursor	Strand	Position	Tag	Length	Hits	Abundance
MIR156a	+	709	GCTCACTGCTCTTTCTGTCAGATTCCGGTGCTGATCTCTTTGGCCTGTCT	50	1	1
MIR156a	+	731	TTCCGGTGCTGATCTCTTTGGCCTGTCTTCGTTCTCTATGTCTCAATCTC	50	1	2
MIR156a	+	756	TCTTCGTTCTCTATGTCTCAATCTC	25	1	2
MIR156a	+	756	TCTTCGTTCTCTATGTCTCAATCT	24	1	1
MIR156a	+	757	CTTCGTTCTCTATGTCTCAATCTC	24	1	6
MIR156a	+	758	TTCGTTCTCTATGTCTCAATCTC	23	1	3
MIR156a	+	759	TCGTTCTCTATGTCTCAATCTC	22	1	8
MIR156a	+	760	CGTTCTCTATGTCTCAATCTC	21	1	194
MIR156a	+	761	GTTCTCTATGTCTCAATCT	19	1	3
MIR156a	+	761	GTTCTCTATGTCTCAATCTC	20	1	1272
MIR156a	+	762	TTCTCTATGTCTCAATCTC	19	1	12
MIR156a	+	763	TCTCTATGTCTCAATCTC	18	1	6
MIR156b	+	426	TGCCTATCTCTGCCTGCTTGACCTCTCTCTCTCTCTCTCTCTCTCAAATT	50	1	2
MIR156b	+	448	CTCTCTCTCTCTCTCTCTC	19	11	9
MIR156b	+	448	CTCTCTCTCTCTCTCTCTCTC	21	7	2
MIR156b	+	450	CTCTCTCTCTCTCTCTCTC	19	11	9
MIR156b	+	450	CTCTCTCTCTCTCTCTCTCTC	21	7	2
MIR156b	+	451	TCTCTCTCTCTCTCTCTCTCAAATTTGGCTTAGAC	35	1	1
MIR156b	+	452	CTCTCTCTCTCTCTCTCTC	19	11	9
MIR156b	+	453	TCTCTCTCTCTCTCTCTCAAATTTGGCTTAGAC	33	1	3
MIR156b	+	454	CTCTCTCTCTCTCTCTCAAATTTGGCTTAGAC	32	1	2
MIR156b	+	455	TCTCTCTCTCTCTCTCAAATTTGGCTTAGAC	31	1	9
MIR156b	+	456	CTCTCTCTCTCTCTCAAATTTGGCTTAGAC	30	1	3
MIR156b	+	457	TCTCTCTCTCTCTCAAATTTGGCTTAGAC	29	1	6
MIR156b	+	458	CTCTCTCTCTCTCAAATTTGGCTTAGAC	28	1	4
MIR156b	+	459	TCTCTCTCTCTCAAATTTGGCTTAGAC	27	1	5
MIR156b	+	460	CTCTCTCTCTCAAATTTGGCTTAGAC	26	1	6
MIR156b	+	461	TCTCTCTCTCAAATTTGGCTTAGAC	25	1	19
MIR156b	+	462	CTCTCTCTCAAATTTGGCTTAGAC	24	1	22
MIR156b	+	463	TCTCTCTCAAATTTGGCTTAGAC	23	1	24
MIR156b	+	464	CTCTCTCAAATTTGGCTTAGAC	22	1	78
MIR156b	+	465	TCTCTCAAATTTGGCTTAGAC	21	1	75
MIR156b	+	465	TCTCTCAAATTTGGCTTAGA	20	1	1
MIR156b	+	466	CTCTCAAATTTGGCTTAGA	19	1	6
MIR156b	+	466	CTCTCAAATTTGGCTTAGAC	20	1	2163
MIR156b	+	467	TCTCAAATTTGGCTTAGA	18	1	12
MIR156b	+	467	TCTCAAATTTGGCTTAGAC	19	1	5993
MIR156b	+	468	CTCAAATTTGGCTTAGAC	18	1	22
MIR156c	+	947	ACCTTCAAAGTCTGCCTCCTTTCCAATCTTCTTTCTTCTGTTCGATCTCT	50	1	2
MIR156c	+	1154	GCTCACTGCTCTATCTGTCAGATTCCGGCTCCGATTCGGTCCCGGTCACG	50	1	2
MIR156c	+	1176	TTCCGGCTCCGATTCGGTCCCGGTCACGTTTTCTTCTTCTAATTGTGTTC	50	1	5
MIR156c	+	1203	GTTTTCTTCTTCTAATTGTGTTCCC	25	1	3
MIR156c	+	1204	TTTTCTTCTTCTAATTGTGTTCCC	24	1	56
MIR156c	+	1205	TTTCTTCTTCTAATTGTGTTCCC	23	1	89
MIR156c	+	1206	TTCTTCTTCTAATTGTGTTCCC	22	1	95
MIR156c	+	1206	TTCTTCTTCTAATTGTGTTCC	21	1	3
MIR156c	+	1207	TCTTCTTCTAATTGTGTTCCC	21	1	434
MIR156c	+	1207	TCTTCTTCTAATTGTGTTCC	20	1	1
MIR156c	+	1208	CTTCTTCTAATTGTGTTCC	19	1	35
MIR156c	+	1208	CTTCTTCTAATTGTGTTC	18	1	1
MIR156c	+	1208	CTTCTTCTAATTGTGTTCCC	20	1	8915
MIR156c	+	1209	TTCTTCTAATTGTGTTCC	18	1	89
MIR156c	+	1209	TTCTTCTAATTGTGTTCCC	19	1	15666
MIR156c	+	1210	TCTTCTAATTGTGTTCCC	18	1	4
MIR156d	+	435	GCTCACTCTCTTTTTGTCATAACTTCTCCTTCATGAATCTTCCTTATTCC	50	1	6
MIR156d	+	456	ACTTCTCCTTCATGAATCTTCCTTATTCCATTGTTCTAGTTATGATTTTG	50	1	1
MIR156d	+	457	CTTCTCCTTCATGAATCTTCCTTATTCCATTGTTCTAGTTATGATTTTGT	50	1	2
MIR156d	+	479	TATTCCATTGTTCTAGTTATGATTTTGTG	29	1	1
MIR156d	+	484	CATTGTTCTAGTTATGATTTTGTG	24	1	2
MIR156d	+	485	ATTGTTCTAGTTATGATTTTGTG	23	1	7
MIR156d	+	486	TTGTTCTAGTTATGATTTTGTG	22	1	10
MIR156d	+	487	TGTTCTAGTTATGATTTTGTG	21	1	53
MIR156d	+	488	GTTCTAGTTATGATTTTGT	19	1	5
MIR156d	+	488	GTTCTAGTTATGATTTTG	18	1	2
MIR156d	+	488	GTTCTAGTTATGATTTTGTG	20	1	2588
MIR156d	+	490	TCTAGTTATGATTTTGTG	18	1	1
MIR156e	+	539	AGGTTAATTATAACTAGTAAAA	22	1	1
MIR156e	+	540	GGTTAATTATAACTAGTAAAA	21	1	1
MIR156e	+	541	GTTAATTATAACTAGTAAAA	20	1	13
MIR156f	+	243	TCTCTCTACAGCATTTCATTTAGTT	25	1	2
MIR156f	+	244	CTCTCTACAGCATTTCATTTAGTT	24	1	1
MIR156f	+	246	CTCTACAGCATTTCATTTAGTT	22	1	3
MIR156f	+	247	TCTACAGCATTTCATTTAGTT	21	1	117
MIR156f	+	248	CTACAGCATTTCATTTAGTT	20	1	619
MIR156f	+	248	CTACAGCATTTCATTTAGT	19	1	2
MIR156f	+	249	TACAGCATTTCATTTAGT	18	1	3
MIR156f	+	249	TACAGCATTTCATTTAGTT	19	1	642
MIR156f	+	250	ACAGCATTTCATTTAGTT	18	1	9
MIR156g	+	486	CCTCTCTACGTCTATTTATCTATCTATCTATGGACTATGTGTA	43	1	1
MIR156g	+	500	TTTATCTATCTATCTATGGACTATGTGTA	29	1	1
MIR156g	+	502	TATCTATCTATCTATGGACTATGTGTA	27	1	1
MIR156g	+	503	ATCTATCTATCTATGGACTATGTGTA	26	1	8
MIR156g	+	504	TCTATCTATCTATGGACTATGTGTA	25	1	1
MIR156g	+	505	CTATCTATCTATGGACTATGTGTA	24	1	3
MIR156g	+	506	TATCTATCTATGGACTATGTGTA	23	1	11
MIR156g	+	507	ATCTATCTATGGACTATGTGT	21	1	5
MIR156g	+	507	ATCTATCTATGGACTATGTGTA	22	1	1768
MIR156g	+	508	TCTATCTATGGACTATGTGTA	21	1	504
MIR156g	+	509	CTATCTATGGACTATGTGTA	20	1	2957
MIR156g	+	509	CTATCTATGGACTATGTGT	19	1	1
MIR156g	+	509	CTATCTATGGACTATGTG	18	1	1
MIR156g	+	510	TATCTATGGACTATGTGT	18	1	6
MIR156g	+	510	TATCTATGGACTATGTGTA	19	1	5032
MIR156g	+	511	ATCTATGGACTATGTGTA	18	1	7
MIR156h	+	610	CGTGTCATGAGCGTATGTTAT	21	1	21
MIR156h	+	611	GTGTCATGAGCGTATGTTAT	20	1	175
MIR156h	+	611	GTGTCATGAGCGTATGTTA	19	1	5
MIR156h	+	613	GTCATGAGCGTATGTTAT	18	1	2
MIR157a	+	625	TAAGCTTTTGATATAACTATTAT	23	1	2
MIR157a	+	626	AAGCTTTTGATATAACTATTAT	22	1	7
MIR157a	+	627	AGCTTTTGATATAACTATTAT	21	1	14
MIR157a	+	628	GCTTTTGATATAACTATTAT	20	1	229
MIR157a	+	629	CTTTTGATATAACTATTAT	19	1	1
MIR157a	+	630	TTTTGATATAACTATTAT	18	1	29
MIR157b	+	522	TTCACATATTTATACACAACTATG	24	1	2
MIR157b	+	523	TCACATATTTATACACAACTATG	23	1	2
MIR157b	+	524	CACATATTTATACACAACTATG	22	1	6
MIR157b	+	525	ACATATTTATACACAACTATG	21	1	14
MIR157b	+	525	ACATATTTATACACAACTAT	20	1	1
MIR157b	+	526	CATATTTATACACAACTATG	20	1	387
MIR157b	+	526	CATATTTATACACAACTAT	19	1	4
MIR157b	+	527	ATATTTATACACAACTATG	19	1	834
MIR157b	+	527	ATATTTATACACAACTAT	18	1	8
MIR157b	+	528	TATTTATACACAACTATG	18	1	5
MIR157c	+	804	TATACGCACATTCACATCTATATA	24	1	3
MIR157c	+	805	ATACGCACATTCACATCTATATA	23	1	7
MIR157c	+	806	TACGCACATTCACATCTATATA	22	1	6
MIR157c	+	807	ACGCACATTCACATCTATATA	21	1	251
MIR157c	+	807	ACGCACATTCACATCTATAT	20	1	1
MIR157c	+	808	CGCACATTCACATCTATATA	20	1	1889
MIR157c	+	808	CGCACATTCACATCTATAT	19	1	4
MIR157c	+	809	GCACATTCACATCTATAT	18	1	11
MIR157c	+	809	GCACATTCACATCTATATA	19	1	6442
MIR157c	+	810	CACATTCACATCTATATA	18	1	76
MIR157d	+	765	CCTTTCTTTCTCTATTTCTCTCTACATATTACATACTCACGTATCTTACT	50	1	1
MIR157d	+	794	TACATACTCACGTATCTTACTT	22	1	1
MIR157d	+	796	CATACTCACGTATCTTACTT	20	1	7
MIR157d	+	797	ATACTCACGTATCTTACTT	19	1	38
MIR158a	+	489	CTTTGTCTACAATTTTGGAAAAAGTGATGACGCCATTGCTCTTTCCCAAA	50	1	1
MIR158a	+	552	ATACCGTGATGATGTCGTGGAGATTTTGTTGAGATGCTACGAGCGTGTAA	50	1	1
MIR158a	+	573	GATTTTGTTGAGATGCTACGAGCGTGTAAAT	31	1	2
MIR158a	+	581	TGAGATGCTACGAGCGTGTAAAT	23	1	1
MIR158a	+	582	GAGATGCTACGAGCGTGTAAAT	22	1	9
MIR158a	+	583	AGATGCTACGAGCGTGTAAAT	21	1	55
MIR158a	+	583	AGATGCTACGAGCGTGTAAA	20	1	1
MIR158a	+	584	GATGCTACGAGCGTGTAAA	19	1	1
MIR158a	+	584	GATGCTACGAGCGTGTAAAT	20	1	367
MIR158b	+	425	ATGTTACGAACGTGTGTATATG	22	1	1
MIR158b	+	426	TGTTACGAACGTGTGTATATG	21	1	3
MIR158b	+	427	GTTACGAACGTGTGTATATG	20	1	47
MIR158b	+	429	TACGAACGTGTGTATATG	18	1	2
MIR159a	+	460	ATAGATCTTGATCTGACGATGGAAGTAGAGCTCCTTAAAGTTCAAACATG	50	1	5
MIR159a	+	596	ATTGCATATCTCAGGAGCTTTAACTTGCCCTTTAATGGCTTTTACTCTTC	50	1	7
MIR159a	+	617	AACTTGCCCTTTAATGGCTTTTACTCTTCTTTGGATTGAAGGGAGCTCTA	50	1	1
MIR159a	+	633	GCTTTTACTCTTCTTTGGATTGAAGGGAGCTCTACATCTTCTTTCACCTT	50	1	1
MIR159a	+	646	TTTGGATTGAAGGGAGCTCTACATCTTCTTTCACCTTCTCTATTTTTTAT	50	1	1
MIR159a	+	667	CATCTTCTTTCACCTTCTCTATTTTTTATTTTTCTTTATTTCTACTCAAC	50	1	8
MIR159a	+	668	ATCTTCTTTCACCTTCTCTATTTTTTATTTTTCTTTATTTCTACTCAACA	50	1	1
MIR159a	+	693	TATTTTTCTTTATTTCTACTCAACAATTATTTATT	35	1	1
MIR159a	+	706	TTCTACTCAACAATTATTTATT	22	1	6
MIR159a	+	707	TCTACTCAACAATTATTTATT	21	1	7
MIR159a	+	708	CTACTCAACAATTATTTAT	19	1	4
MIR159a	+	708	CTACTCAACAATTATTTATT	20	1	185
MIR159a	+	709	TACTCAACAATTATTTATT	19	1	596
MIR159a	+	709	TACTCAACAATTATTTAT	18	1	8
MIR159a	+	983	CTAACAACTAAATCCTGTTCTACAATCACAGTCCTTTAGTTAATTGCGAA	50	1	2
MIR159b	+	562	ATGCCATATCTCAGGAGCTTTCACTTACCCCTTTAATGGCTTCACTCTTC	50	1	10
MIR159b	+	576	GAGCTTTCACTTACCCCTTTAATGGCTTCACTCTTCTTTGGATTGAAGGG	50	1	6
MIR159b	+	578	GCTTTCACTTACCCCTTTAATGGCTTCACTCTTCTTTGGATTGAAGGGAG	50	1	6
MIR159b	+	583	CACTTACCCCTTTAATGGCTTCACTCTTCTTTGGATTGAAGGGAGCTCTT	50	1	4
MIR159b	+	584	ACTTACCCCTTTAATGGCTTCACTCTTCTTTGGATTGAAGGGAGCTCTTC	50	1	1
MIR159b	+	612	TTTGGATTGAAGGGAGCTCTTCATCTCTCCA	31	1	1
MIR159b	+	612	TTTGGATTGAAGGGAGCTCTTCATCTC	27	1	1
MIR159b	+	633	CATCTCTCCATCCCTATCTCTCTCTCTCTCTATCTTTAGTTCTTTTAAGA	50	1	1
MIR159b	+	650	CTCTCTCTCTCTCTATCT	18	2	2
MIR159b	+	660	CTCTATCTTTAGTTCTTTTAAGAATG	26	1	1
MIR159b	+	664	ATCTTTAGTTCTTTTAAGAATG	22	1	1
MIR159b	+	665	TCTTTAGTTCTTTTAAGAATG	21	1	3
MIR159b	+	666	CTTTAGTTCTTTTAAGAATG	20	1	111
MIR159b	+	667	TTTAGTTCTTTTAAGAATG	19	1	279
MIR159b	+	668	TTAGTTCTTTTAAGAATG	18	1	6
MIR159b	+	668	TTAGTTCTTTTAAGAATGACTTTTCATTTTTTGTGTTGTCTGTTGCAGGT	50	1	2
MIR159c	+	678	AAAACTTGGTTTCGATCTAACTTG	24	1	3
MIR159c	+	679	AAACTTGGTTTCGATCTAACTTG	23	1	7
MIR159c	+	680	AACTTGGTTTCGATCTAACTTG	22	1	100
MIR159c	+	681	ACTTGGTTTCGATCTAACTT	20	1	1
MIR159c	+	681	ACTTGGTTTCGATCTAACTTG	21	1	538
MIR159c	+	681	ACTTGGTTTCGATCTAACT	19	1	2
MIR159c	+	682	CTTGGTTTCGATCTAACTT	19	1	8
MIR159c	+	682	CTTGGTTTCGATCTAACTTG	20	1	4002
MIR159c	+	682	CTTGGTTTCGATCTAACT	18	1	3
MIR159c	+	683	TTGGTTTCGATCTAACTTGT	20	1	1
MIR159c	+	683	TTGGTTTCGATCTAACTTG	19	1	16322
MIR159c	+	683	TTGGTTTCGATCTAACTT	18	1	43
MIR159c	+	684	TGGTTTCGATCTAACTTG	18	1	25
MIR160a	+	541	GCGTATGAGGAGCCATGCATATCCTCATACATATATAATTATGTTTTGGT	50	1	4
MIR160a	+	562	TCCTCATACATATATAATTATGTTTTGGTACCAATTGAATTGTGTTGATG	50	1	2
MIR160a	+	579	TTATGTTTTGGTACCAATTGAATTGTGTTGATG	33	1	1
MIR160a	+	583	GTTTTGGTACCAATTGAATTGTGTTGATG	29	1	1
MIR160a	+	590	TACCAATTGAATTGTGTTGATG	22	1	98
MIR160a	+	590	TACCAATTGAATTGTGTTGAT	21	1	1
MIR160a	+	591	ACCAATTGAATTGTGTTGATG	21	1	117
MIR160a	+	591	ACCAATTGAATTGTGTTGAT	20	1	1
MIR160a	+	592	CCAATTGAATTGTGTTGATG	20	1	191
MIR160a	+	592	CCAATTGAATTGTGTTGA	18	1	1
MIR160a	+	593	CAATTGAATTGTGTTGAT	18	1	2
MIR160a	+	593	CAATTGAATTGTGTTGATG	19	1	543
MIR160a	+	594	AATTGAATTGTGTTGATG	18	1	4
MIR160b	+	595	ATATGTATATGAGTACTTTGTCTC	24	1	1
MIR160b	+	597	ATGTATATGAGTACTTTGTCT	21	1	1
MIR160b	+	597	ATGTATATGAGTACTTTGTCTC	22	1	2
MIR160b	+	598	TGTATATGAGTACTTTGTCTC	21	1	3
MIR160b	+	599	GTATATGAGTACTTTGTCTC	20	1	40
MIR160c	+	683	GCGTACAAGGAGTCAAGCATGACCAGAAGCATATGGTAACTCAATTGCAT	50	1	14
MIR160c	+	693	AGTCAAGCATGACCAGAAGCATATGGTAACTCAATTGCATCTACAACTAA	50	1	11
MIR160c	+	696	CAAGCATGACCAGAAGCATATGGTAACTCAATTGCATCTACAACTAAATA	50	1	2
MIR160c	+	697	AAGCATGACCAGAAGCATATGGTAACTCAATTGCATCTACAACTAAATAT	50	1	1
MIR160c	+	704	ACCAGAAGCATATGGTAACTCAATTGCATCTACAACTAAATATGAAATAT	50	1	8
MIR160c	+	733	CTACAACTAAATATGAAATATCT	23	1	6
MIR160c	+	734	TACAACTAAATATGAAATATC	21	1	3
MIR160c	+	734	TACAACTAAATATGAAATATCT	22	1	10
MIR160c	+	735	ACAACTAAATATGAAATATCT	21	1	87
MIR160c	+	736	CAACTAAATATGAAATATC	19	1	12
MIR160c	+	736	CAACTAAATATGAAATATCT	20	1	869
MIR160c	+	737	AACTAAATATGAAATATC	18	1	99
MIR160c	+	737	AACTAAATATGAAATATCT	19	1	5601
MIR160c	+	738	ACTAAATATGAAATATCT	18	1	6
MIR161	+	510	CACTTTCACTGCATTAATCAATGCATTTGTAAAAAGAGGGAAAAGCATTG	50	1	3
MIR161	+	521	CATTAATCAATGCATTTGTAAAAAGAGGGAAAAGCATTGAAATTGTGTAA	50	1	24
MIR161	+	525	AATCAATGCATTTGTAAAAAGAGGGAAAAGCATTGAAATTGTGTAAGGAG	50	1	5
MIR161	+	529	AATGCATTTGTAAAAAGAGGGAAAAGCATTGAAATTGTGTAAGGAGATGG	50	1	20
MIR161	+	554	GCATTGAAATTGTGTAAGGAGATGG	25	1	7
MIR161	+	555	CATTGAAATTGTGTAAGGAGATGG	24	1	5
MIR161	+	556	ATTGAAATTGTGTAAGGAGATGG	23	1	121
MIR161	+	557	TTGAAATTGTGTAAGGAGATGG	22	1	797
MIR161	+	557	TTGAAATTGTGTAAGGAGAT	20	1	1
MIR161	+	558	TGAAATTGTGTAAGGAGATG	20	1	3
MIR161	+	558	TGAAATTGTGTAAGGAGATGG	21	1	926
MIR161	+	558	TGAAATTGTGTAAGGAGA	18	1	1
MIR161	+	559	GAAATTGTGTAAGGAGAT	18	1	1
MIR161	+	559	GAAATTGTGTAAGGAGATG	19	1	14
MIR161	+	559	GAAATTGTGTAAGGAGATGG	20	1	5000
MIR161	+	560	AAATTGTGTAAGGAGATGG	19	1	9
MIR161	+	561	AATTGTGTAAGGAGATGG	18	1	16
MIR162a	+	844	TCGATAAACCTCTGCATCCA	20	2	9
MIR162a	+	845	CGATAAACCTCTGCATCCA	19	2	2
MIR162a	+	866	GTTTGCCTCTTGTATCTTTCTTATTGACTTGAATCTTTTTGTTTATTGGT	50	1	1
MIR162a	+	884	TCTTATTGACTTGAATCTTTTTGTTTATTGGT	32	1	1
MIR162a	+	887	TATTGACTTGAATCTTTTTGTTTATTGGT	29	1	1
MIR162a	+	892	ACTTGAATCTTTTTGTTTATTGGT	24	1	1
MIR162a	+	893	CTTGAATCTTTTTGTTTATTGGT	23	1	28
MIR162a	+	894	TTGAATCTTTTTGTTTATTGGT	22	1	108
MIR162a	+	895	TGAATCTTTTTGTTTATTGGT	21	1	106
MIR162a	+	896	GAATCTTTTTGTTTATTGGT	20	1	985
MIR162a	+	896	GAATCTTTTTGTTTATTGG	19	1	2
MIR162a	+	897	AATCTTTTTGTTTATTGGT	19	1	8
MIR162a	+	898	ATCTTTTTGTTTATTGGT	18	1	1
MIR162b	+	570	TCGATAAACCTCTGCATCCAGCGCTGCTTGCTCTTCATGACTTTTGTTTA	50	1	6
MIR162b	+	570	TCGATAAACCTCTGCATCCA	20	2	9
MIR162b	+	571	CGATAAACCTCTGCATCCA	19	2	2
MIR162b	+	589	AGCGCTGCTTGCTCTTCATGACTTTTGTTTAATTGATATCTATTTGAGTA	50	1	1
MIR162b	+	591	CGCTGCTTGCTCTTCATGACTTTTGTTTAATTGATATCTATTTGAGTATT	50	1	4
MIR162b	+	619	AATTGATATCTATTTGAGTATTGC	24	1	1
MIR162b	+	620	ATTGATATCTATTTGAGTATTGC	23	1	60
MIR162b	+	621	TTGATATCTATTTGAGTATTGC	22	1	78
MIR162b	+	622	TGATATCTATTTGAGTATTGC	21	1	140
MIR162b	+	622	TGATATCTATTTGAGTATTG	20	1	2
MIR162b	+	623	GATATCTATTTGAGTATTG	19	1	12
MIR162b	+	623	GATATCTATTTGAGTATTGC	20	1	2805
MIR162b	+	624	ATATCTATTTGAGTATTGC	19	1	1
MIR162b	+	625	TATCTATTTGAGTATTGC	18	1	1
MIR162b	+	626	ATCTATTTGAGTATTGCT	18	1	3
MIR163	+	419	ACAGTTCTCATCAAATATTTGAAAGTATCAAACAAAAAAAGGAGAGTGAG	50	1	3
MIR163	+	771	TGATGACTCCTACGTGGAACCTCTTCTTAGGAAGAGCACGGTCGAAGAAG	50	1	1
MIR163	+	841	CGTAGATGCTAAAGTCGTTGAAGAGGACTTGGAACTTCGATATTATCCCC	50	1	1
MIR163	+	866	GACTTGGAACTTCGATATTATCCCCCGTGTTTTGTCCAGTTTCTCTATAG	50	1	2
MIR163	+	867	ACTTGGAACTTCGATATTATCCCCCGTGTTTTGTCCAGTTTCTCTATAGG	50	1	2
MIR163	+	879	GATATTATCCCCCGTGTTTTGTCCAGTTTCTCTATAGGTTGTGCCTGAAA	50	1	1
MIR163	+	882	ATTATCCCCCGTGTTTTGTCCAGTTTCTCTATAGGTTGTGCCTGAAAATA	50	1	3
MIR163	+	884	TATCCCCCGTGTTTTGTCCAGTTTCTCTATAGGTTGTGCCTGAAAATATG	50	1	2
MIR163	+	892	GTGTTTTGTCCAGTTTCTCTATAGGTTGTGCCTGAAAATATGG	43	1	2
MIR163	+	894	GTTTTGTCCAGTTTCTCTATAGGTTGTGCCTGAAAATATGG	41	1	1
MIR163	+	897	TTGTCCAGTTTCTCTATAGGTTGTGCCTGAAAATATGG	38	1	1
MIR163	+	900	TCCAGTTTCTCTATAGGTTGTGCCTGAAAATATGG	35	1	1
MIR163	+	902	CAGTTTCTCTATAGGTTGTGCCTGAAAATATGG	33	1	1
MIR163	+	903	AGTTTCTCTATAGGTTGTGCCTGAAAATATGG	32	1	12
MIR163	+	906	TTCTCTATAGGTTGTGCCTGAAAATATGG	29	1	4
MIR163	+	908	CTCTATAGGTTGTGCCTGAAAATATGG	27	1	2
MIR163	+	911	TATAGGTTGTGCCTGAAAATATGG	24	1	1
MIR163	+	912	ATAGGTTGTGCCTGAAAATATGG	23	1	23
MIR163	+	913	TAGGTTGTGCCTGAAAATATGG	22	1	188
MIR163	+	914	AGGTTGTGCCTGAAAATATG	20	1	3
MIR163	+	914	AGGTTGTGCCTGAAAATATGG	21	1	749
MIR163	+	915	GGTTGTGCCTGAAAATATG	19	1	15
MIR163	+	915	GGTTGTGCCTGAAAATATGG	20	1	3168
MIR163	+	916	GTTGTGCCTGAAAATATGG	19	1	103
MIR163	+	917	TTGTGCCTGAAAATATGG	18	1	8
MIR164a	+	571	TTATATATCCCTTAAACCTTATTGATAAT	29	1	1
MIR164a	+	573	ATATATCCCTTAAACCTTATTGATAAT	27	1	5
MIR164a	+	574	TATATCCCTTAAACCTTATTGATAAT	26	1	1
MIR164a	+	575	ATATCCCTTAAACCTTATTGATAAT	25	1	17
MIR164a	+	576	TATCCCTTAAACCTTATTGATAA	23	1	3
MIR164a	+	576	TATCCCTTAAACCTTATTGATAAT	24	1	1120
MIR164a	+	577	ATCCCTTAAACCTTATTGATA	21	1	2
MIR164a	+	577	ATCCCTTAAACCTTATTGATAAT	23	1	2030
MIR164a	+	577	ATCCCTTAAACCTTATTGATAA	22	1	5
MIR164a	+	578	TCCCTTAAACCTTATTGATAAT	22	1	1461
MIR164a	+	578	TCCCTTAAACCTTATTGATAA	21	1	6
MIR164a	+	579	CCCTTAAACCTTATTGATA	19	1	1
MIR164a	+	579	CCCTTAAACCTTATTGATAAT	21	1	7002
MIR164a	+	579	CCCTTAAACCTTATTGATAA	20	1	31
MIR164a	+	580	CCTTAAACCTTATTGATA	18	1	3
MIR164a	+	580	CCTTAAACCTTATTGATAAT	20	1	16515
MIR164a	+	580	CCTTAAACCTTATTGATAA	19	1	73
MIR164a	+	581	CTTAAACCTTATTGATAAT	19	1	106357
MIR164a	+	581	CTTAAACCTTATTGATAA	18	1	358
MIR164a	+	582	TTAAACCTTATTGATAAT	18	1	450
MIR164b	+	407	CTTTCTCTCTCTCTCTCTC	19	1	1
MIR164b	+	411	CTCTCTCTCTCTCTCTCTC	19	11	9
MIR164b	+	636	ATGACCACTCCACCTTGGTGACGATGACGACGAGGGTTCAAGTGTTACGC	50	1	16
MIR164b	+	655	GACGATGACGACGAGGGTTCAAGTGTTACGC	31	1	1
MIR164b	+	661	GACGACGAGGGTTCAAGTGTTACGC	25	1	3
MIR164b	+	662	ACGACGAGGGTTCAAGTGTTACGC	24	1	14
MIR164b	+	663	CGACGAGGGTTCAAGTGTTAC	21	1	1
MIR164b	+	663	CGACGAGGGTTCAAGTGTTACGC	23	1	158
MIR164b	+	663	CGACGAGGGTTCAAGTGTTACG	22	1	10
MIR164b	+	664	GACGAGGGTTCAAGTGTTACG	21	1	17
MIR164b	+	664	GACGAGGGTTCAAGTGTTACGC	22	1	750
MIR164b	+	665	ACGAGGGTTCAAGTGTTAC	19	1	2
MIR164b	+	665	ACGAGGGTTCAAGTGTTACGC	21	1	8589
MIR164b	+	665	ACGAGGGTTCAAGTGTTACG	20	1	127
MIR164b	+	665	ACGAGGGTTCAAGTGTTA	18	1	1
MIR164b	+	666	CGAGGGTTCAAGTGTTACG	19	1	961
MIR164b	+	666	CGAGGGTTCAAGTGTTACGC	20	1	33716
MIR164b	+	666	CGAGGGTTCAAGTGTTAC	18	1	9
MIR164b	+	667	GAGGGTTCAAGTGTTACGC	19	1	404091
MIR164b	+	667	GAGGGTTCAAGTGTTACG	18	1	4913
MIR164b	+	668	AGGGTTCAAGTGTTACGC	18	1	1360
MIR164c	+	550	TGTTCTACTACTCCAACACGTGTCTCTCCCCCTCCCCGAGGATGCAATCG	50	1	2
MIR164c	+	567	ACGTGTCTCTCCCCCTCCCCGAGGATGCAATCGTCAATGGATAGAACAGA	50	1	2
MIR164c	+	569	GTGTCTCTCCCCCTCCCCGAGGATGCAATCGTCAATGGATAGAACAGAAT	50	1	1
MIR164c	+	592	TGCAATCGTCAATGGATAGAACAGAA	26	1	2
MIR164c	+	594	CAATCGTCAATGGATAGAACAGAA	24	1	26
MIR164c	+	595	AATCGTCAATGGATAGAACAGAA	23	1	86
MIR164c	+	596	ATCGTCAATGGATAGAACAGAA	22	1	754
MIR164c	+	597	TCGTCAATGGATAGAACAGA	20	1	5
MIR164c	+	597	TCGTCAATGGATAGAACAGAA	21	1	1357
MIR164c	+	598	CGTCAATGGATAGAACAGA	19	1	71
MIR164c	+	598	CGTCAATGGATAGAACAG	18	1	5
MIR164c	+	598	CGTCAATGGATAGAACAGAAT	21	1	4
MIR164c	+	598	CGTCAATGGATAGAACAGAA	20	1	38412
MIR164c	+	599	GTCAATGGATAGAACAGAAT	20	1	8
MIR164c	+	599	GTCAATGGATAGAACAGAA	19	1	232205
MIR164c	+	599	GTCAATGGATAGAACAGA	18	1	293
MIR164c	+	600	TCAATGGATAGAACAGAA	18	1	26
MIR165a	+	969	CCAACATGTTATTGCCTCTGATCACCATTTATTGTTACATTTTTTTTTGT	50	1	33
MIR165a	+	996	TTTATTGTTACATTTTTTTTTGTTAATT	28	1	4
MIR165a	+	997	TTATTGTTACATTTTTTTTTGTTAATT	27	1	1
MIR165a	+	998	TATTGTTACATTTTTTTTTGTTAATT	26	1	1
MIR165a	+	999	ATTGTTACATTTTTTTTTGTTAATT	25	1	17
MIR165a	+	1000	TTGTTACATTTTTTTTTGTTAATT	24	1	45
MIR165a	+	1001	TGTTACATTTTTTTTTGTTAATT	23	1	154
MIR165a	+	1002	GTTACATTTTTTTTTGTTA	19	1	3
MIR165a	+	1002	GTTACATTTTTTTTTGTTAAT	21	1	48
MIR165a	+	1002	GTTACATTTTTTTTTGTTAA	20	1	2
MIR165a	+	1002	GTTACATTTTTTTTTGTTAATT	22	1	6685
MIR165a	+	1003	TTACATTTTTTTTTGTTAATT	21	1	12
MIR165a	+	1004	TACATTTTTTTTTGTTAATT	20	1	12
MIR165a	+	1005	ACATTTTTTTTTGTTAATT	19	1	5
MIR165a	+	1006	CATTTTTTTTTGTTAATT	18	1	20
MIR165b	+	845	TCAACATGTTAATTGCCTTCAATCACTCTGGAGAAACTACAAAACCTTGA	50	1	55
MIR165b	+	846	CAACATGTTAATTGCCTTCAATCACTCTGGAGAAACTACAAAACCTTGAT	50	1	2
MIR165b	+	871	TCTGGAGAAACTACAAAACCTTGA	24	1	6
MIR165b	+	872	CTGGAGAAACTACAAAACCTTGA	23	1	3
MIR165b	+	873	TGGAGAAACTACAAAACCTTGA	22	1	34
MIR165b	+	874	GGAGAAACTACAAAACCTTG	20	1	2
MIR165b	+	874	GGAGAAACTACAAAACCTTGA	21	1	509
MIR165b	+	875	GAGAAACTACAAAACCTTG	19	1	21
MIR165b	+	875	GAGAAACTACAAAACCTTGA	20	1	4032
MIR165b	+	876	AGAAACTACAAAACCTTGA	19	1	29
MIR165b	+	877	GAAACTACAAAACCTTGA	18	1	5
MIR166a	+	540	TCGGACCAGGCTTCATTCCC	20	7	7
MIR166a	+	558	CCCCCAATTGTTGCTCCCTGTTTACTCCATATTTCTTCCTTCTTTTCAAA	50	1	1
MIR166a	+	560	CCCAATTGTTGCTCCCTGTTTACTCCATATTTCTTCCTTCTTTTCAAATT	50	1	9
MIR166a	+	561	CCAATTGTTGCTCCCTGTTTACTCCATATTTCTTCCTTCTTTTCAAATTA	50	1	115
MIR166a	+	562	CAATTGTTGCTCCCTGTTTACTCCATATTTCTTCCTTCTTTTCAAATTAG	50	1	2
MIR166a	+	575	CTGTTTACTCCATATTTCTTCCTTCTTTTCAAATTAGGGT	40	1	2
MIR166a	+	580	TACTCCATATTTCTTCCTTCTTTTCAAATTAGGGT	35	1	1
MIR166a	+	585	CATATTTCTTCCTTCTTTTCAAATTAGGGT	30	1	1
MIR166a	+	589	TTTCTTCCTTCTTTTCAAATTAGGGT	26	1	4
MIR166a	+	590	TTCTTCCTTCTTTTCAAATTAGGGT	25	1	18
MIR166a	+	591	TCTTCCTTCTTTTCAAATTAGGGT	24	1	15
MIR166a	+	592	CTTCCTTCTTTTCAAATTAGGGT	23	1	136
MIR166a	+	593	TTCCTTCTTTTCAAATTAGGGT	22	1	97
MIR166a	+	594	TCCTTCTTTTCAAATTAGGGT	21	1	204
MIR166a	+	595	CCTTCTTTTCAAATTAGGGTT	21	1	3
MIR166a	+	595	CCTTCTTTTCAAATTAGGGT	20	1	5043
MIR166a	+	595	CCTTCTTTTCAAATTAGG	18	1	2
MIR166a	+	595	CCTTCTTTTCAAATTAGGG	19	1	35
MIR166a	+	596	CTTCTTTTCAAATTAGGG	18	1	184
MIR166a	+	596	CTTCTTTTCAAATTAGGGTT	20	1	2
MIR166a	+	596	CTTCTTTTCAAATTAGGGT	19	1	36358
MIR166a	+	597	TTCTTTTCAAATTAGGGT	18	1	299
MIR166b	+	230	CTCTCTCTCTCTCTCTCTC	19	11	9
MIR166b	+	230	CTCTCTCTCTCTCTCTCTCTC	21	7	2
MIR166b	+	232	CTCTCTCTCTCTCTCTCTC	19	11	9
MIR166b	+	232	CTCTCTCTCTCTCTCTCTCTC	21	7	2
MIR166b	+	234	CTCTCTCTCTCTCTCTCTC	19	11	9
MIR166b	+	234	CTCTCTCTCTCTCTCTCTCTC	21	7	2
MIR166b	+	236	CTCTCTCTCTCTCTCTCTC	19	11	9
MIR166b	+	236	CTCTCTCTCTCTCTCTCTCTC	21	7	2
MIR166b	+	238	CTCTCTCTCTCTCTCTCTC	19	11	9
MIR166b	+	432	ACTCTTATTCTAATACAATCTCATTTGAATACATTCAGATCTGATGATTG	50	1	16
MIR166b	+	500	TCGGACCAGGCTTCATTCCC	20	7	7
MIR166b	+	520	CCCAATTATCACTCCCTCACAATCCGAATTAACGAAGAAGATTTGTCCAT	50	1	32
MIR166b	+	521	CCAATTATCACTCCCTCACAATCCGAATTAACGAAGAAGATTTGTCCATT	50	1	346
MIR166b	+	522	CAATTATCACTCCCTCACAATCCGAATTAACGAAGAAGATTTGTCCATTT	50	1	2
MIR166b	+	534	CCTCACAATCCGAATTAACGAAGAAGATTTGTCCATTT	38	1	2
MIR166b	+	536	TCACAATCCGAATTAACGAAGAAGATTTGTCCATTT	36	1	2
MIR166b	+	541	ATCCGAATTAACGAAGAAGATTTGTCCATTT	31	1	1
MIR166b	+	547	ATTAACGAAGAAGATTTGTCCATTT	25	1	2
MIR166b	+	548	TTAACGAAGAAGATTTGTCCATTT	24	1	6
MIR166b	+	549	TAACGAAGAAGATTTGTCCATTT	23	1	41
MIR166b	+	550	AACGAAGAAGATTTGTCCATTT	22	1	242
MIR166b	+	550	AACGAAGAAGATTTGTCCATT	21	1	6
MIR166b	+	551	ACGAAGAAGATTTGTCCATT	20	1	9
MIR166b	+	551	ACGAAGAAGATTTGTCCATTT	21	1	1034
MIR166b	+	552	CGAAGAAGATTTGTCCATTTT	21	1	2
MIR166b	+	552	CGAAGAAGATTTGTCCATT	19	1	59
MIR166b	+	552	CGAAGAAGATTTGTCCATTT	20	1	5497
MIR166b	+	553	GAAGAAGATTTGTCCATT	18	1	490
MIR166b	+	553	GAAGAAGATTTGTCCATTTT	20	1	4
MIR166b	+	553	GAAGAAGATTTGTCCATTT	19	1	54180
MIR166b	+	554	AAGAAGATTTGTCCATTT	18	1	56
MIR166c	+	436	TCGGACCAGGCTTCATTCCC	20	7	7
MIR166c	+	481	CACTTTCTTTCTTTAGTCTTTTTTGTCTTA	30	1	2
MIR166c	+	482	ACTTTCTTTCTTTAGTCTTTTTTGTCTTA	29	1	2
MIR166c	+	483	CTTTCTTTCTTTAGTCTTTTTTGTCTTA	28	1	1
MIR166c	+	485	TTCTTTCTTTAGTCTTTTTTGTCTTA	26	1	2
MIR166c	+	486	TCTTTCTTTAGTCTTTTTTGTCTTA	25	1	7
MIR166c	+	487	CTTTCTTTAGTCTTTTTTGTCTTA	24	1	62
MIR166c	+	488	TTTCTTTAGTCTTTTTTGTCTTA	23	1	43
MIR166c	+	489	TTCTTTAGTCTTTTTTGTCTTA	22	1	76
MIR166c	+	490	TCTTTAGTCTTTTTTGTCTTA	21	1	165
MIR166c	+	491	CTTTAGTCTTTTTTGTCTTA	20	1	8826
MIR166c	+	491	CTTTAGTCTTTTTTGTCTT	19	1	25
MIR166c	+	492	TTTAGTCTTTTTTGTCTT	18	1	49
MIR166c	+	492	TTTAGTCTTTTTTGTCTTA	19	1	30405
MIR166c	+	493	TTAGTCTTTTTTGTCTTA	18	1	313
MIR166d	+	507	TCGGACCAGGCTTCATTCCC	20	7	7
MIR166d	+	528	CCAACCGACATATCACATTCTTACTTAATTCTTTTTTCTTTTTTGTCTAT	50	1	1
MIR166d	+	554	AATTCTTTTTTCTTTTTTGTCTATCTGCTTT	31	1	1
MIR166d	+	557	TCTTTTTTCTTTTTTGTCTATCTGCTTT	28	1	7
MIR166d	+	559	TTTTTTCTTTTTTGTCTATCTGCTTT	26	1	4
MIR166d	+	560	TTTTTCTTTTTTGTCTATCTGCTTT	25	1	14
MIR166d	+	561	TTTTCTTTTTTGTCTATCTGCTTT	24	1	31
MIR166d	+	562	TTTCTTTTTTGTCTATCTGCTTT	23	1	49
MIR166d	+	563	TTCTTTTTTGTCTATCTGCTTT	22	1	65
MIR166d	+	564	TCTTTTTTGTCTATCTGCTT	20	1	4
MIR166d	+	564	TCTTTTTTGTCTATCTGCTTT	21	1	223
MIR166d	+	565	CTTTTTTGTCTATCTGCTTTGA	22	1	1
MIR166d	+	565	CTTTTTTGTCTATCTGCT	18	1	8
MIR166d	+	565	CTTTTTTGTCTATCTGCTTT	20	1	17428
MIR166d	+	565	CTTTTTTGTCTATCTGCTT	19	1	129
MIR166d	+	566	TTTTTTGTCTATCTGCTT	18	1	210
MIR166d	+	566	TTTTTTGTCTATCTGCTTT	19	1	36326
MIR166d	+	567	TTTTTGTCTATCTGCTTT	18	1	268
MIR166e	+	799	ATGTCTCTTCTTTATTCATTAGTCTATACATGAATGATCATTTTACGGTT	50	1	4
MIR166e	+	856	TCGGACCAGGCTTCATTCCCCT	22	3	8
MIR166e	+	856	TCGGACCAGGCTTCATTCCC	20	7	7
MIR166e	+	876	CTCAATTATATCGCTTCGATCTTTCCTTCTTTGAGTAAACTATCTCCAGG	50	1	2
MIR166e	+	877	TCAATTATATCGCTTCGATCTTTCCTTCTTTGAGTAAACTATCTCCAGGT	50	1	89
MIR166e	+	878	CAATTATATCGCTTCGATCTTTCCTTCTTTGAGTAAACTATCTCCAGGTT	50	1	1
MIR166e	+	889	CTTCGATCTTTCCTTCTTTGAGTAAACTATCTCCAGGTT	39	1	1
MIR166e	+	898	TTCCTTCTTTGAGTAAACTATCTCCAGGTT	30	1	2
MIR166e	+	905	TTTGAGTAAACTATCTCCAGGTT	23	1	11
MIR166e	+	906	TTGAGTAAACTATCTCCAGGTT	22	1	124
MIR166e	+	907	TGAGTAAACTATCTCCAGGTT	21	1	407
MIR166e	+	908	GAGTAAACTATCTCCAGGT	19	1	21
MIR166e	+	908	GAGTAAACTATCTCCAGGTT	20	1	7058
MIR166e	+	908	GAGTAAACTATCTCCAGG	18	1	1
MIR166e	+	910	GTAAACTATCTCCAGGTT	18	1	17
MIR166f	+	418	CCTGGCTCGAGACCATTCAATCTCATGATCTCATGATTATAACGATGATG	50	1	1
MIR166f	+	477	TCGGACCAGGCTTCATTCCCCT	22	3	8
MIR166f	+	477	TCGGACCAGGCTTCATTCCC	20	7	7
MIR166f	+	516	TTCTCAATCTTCAAGACCAATCGTTAGCCGATCA	34	1	1
MIR166f	+	517	TCTCAATCTTCAAGACCAATCGTTAGCCGATCA	33	1	2
MIR166f	+	519	TCAATCTTCAAGACCAATCGTTAGCCGATCA	31	1	1
MIR166f	+	520	CAATCTTCAAGACCAATCGTTAGCCGATCA	30	1	3
MIR166f	+	522	ATCTTCAAGACCAATCGTTAGCCGATCA	28	1	2
MIR166f	+	523	TCTTCAAGACCAATCGTTAGCCGATCA	27	1	7
MIR166f	+	524	CTTCAAGACCAATCGTTAGCCGATCA	26	1	3
MIR166f	+	525	TTCAAGACCAATCGTTAGCCGATCA	25	1	5
MIR166f	+	526	TCAAGACCAATCGTTAGCCGATCA	24	1	14
MIR166f	+	527	CAAGACCAATCGTTAGCCGATCA	23	1	95
MIR166f	+	528	AAGACCAATCGTTAGCCGATC	21	1	5
MIR166f	+	528	AAGACCAATCGTTAGCCGATCA	22	1	1520
MIR166f	+	529	AGACCAATCGTTAGCCGATCA	21	1	6328
MIR166f	+	529	AGACCAATCGTTAGCCGATC	20	1	15
MIR166f	+	530	GACCAATCGTTAGCCGATC	19	1	16
MIR166f	+	530	GACCAATCGTTAGCCGATCA	20	1	14239
MIR166f	+	531	ACCAATCGTTAGCCGATCA	19	1	12
MIR166f	+	532	CCAATCGTTAGCCGATCA	18	1	3644
MIR166g	+	479	TCGGACCAGGCTTCATTCCCCT	22	3	8
MIR166g	+	479	TCGGACCAGGCTTCATTCCC	20	7	7
MIR166g	+	536	CACATTTTATATCACTTCTCAGTTCTCACCCC	32	1	6
MIR166g	+	542	TTATATCACTTCTCAGTTCTCACCCC	26	1	1
MIR166g	+	543	TATATCACTTCTCAGTTCTCACCCC	25	1	3
MIR166g	+	544	ATATCACTTCTCAGTTCTCACCCC	24	1	12
MIR166g	+	545	TATCACTTCTCAGTTCTCACCCC	23	1	36
MIR166g	+	546	ATCACTTCTCAGTTCTCACCC	21	1	2
MIR166g	+	546	ATCACTTCTCAGTTCTCACCCC	22	1	238
MIR166g	+	547	TCACTTCTCAGTTCTCACCC	20	1	5
MIR166g	+	547	TCACTTCTCAGTTCTCACCCC	21	1	456
MIR166g	+	548	CACTTCTCAGTTCTCACCC	19	1	91
MIR166g	+	548	CACTTCTCAGTTCTCACCCC	20	1	7451
MIR166g	+	548	CACTTCTCAGTTCTCACCCCA	21	1	2
MIR166g	+	549	ACTTCTCAGTTCTCACCC	18	1	172
MIR166g	+	549	ACTTCTCAGTTCTCACCCC	19	1	24319
MIR166g	+	549	ACTTCTCAGTTCTCACCCCA	20	1	1
MIR166g	+	550	CTTCTCAGTTCTCACCCC	18	1	64
MIR166g	+	551	TTCTCAGTTCTCACCCCA	18	1	1
MIR167a	+	389	TGAAGCTGCCAGCATGATC	19	3	5
MIR167a	+	389	TGAAGCTGCCAGCATGATCTAATTAGCTTTCTTTATCCTTTGTTGTGTTT	50	1	2
MIR167a	+	389	TGAAGCTGCCAGCATGATCT	20	3	9
MIR167a	+	450	TTAAGAGATCAGTCTCGATTAGATCATGTTCGCAGTTTCACCCGTTGACT	50	1	1
MIR167a	+	492	CGTTGACTGTCGCACCCTTCTATAAACCCTAAATTTTCTCTCTATCTTTT	50	1	4
MIR167a	+	502	CGCACCCTTCTATAAACCCTAAATTTTCTCTCTATCT	37	1	1
MIR167a	+	503	GCACCCTTCTATAAACCCTAAATTTTCTCTCTATCT	36	1	2
MIR167a	+	508	CTTCTATAAACCCTAAATTTTCTCTCTATCT	31	1	1
MIR167a	+	510	TCTATAAACCCTAAATTTTCTCTCTATCT	29	1	8
MIR167a	+	511	CTATAAACCCTAAATTTTCTCTCTATCT	28	1	6
MIR167a	+	512	TATAAACCCTAAATTTTCTCTCTATCT	27	1	1
MIR167a	+	513	ATAAACCCTAAATTTTCTCTCTATCT	26	1	8
MIR167a	+	514	TAAACCCTAAATTTTCTCTCTATCT	25	1	16
MIR167a	+	515	AAACCCTAAATTTTCTCTCTATCT	24	1	222
MIR167a	+	516	AACCCTAAATTTTCTCTCTATC	22	1	1
MIR167a	+	516	AACCCTAAATTTTCTCTCTATCT	23	1	215
MIR167a	+	517	ACCCTAAATTTTCTCTCTATC	21	1	7
MIR167a	+	517	ACCCTAAATTTTCTCTCTATCT	22	1	385
MIR167a	+	518	CCCTAAATTTTCTCTCTATCT	21	1	3851
MIR167a	+	518	CCCTAAATTTTCTCTCTA	18	1	1
MIR167a	+	518	CCCTAAATTTTCTCTCTAT	19	1	6
MIR167a	+	518	CCCTAAATTTTCTCTCTATC	20	1	56
MIR167a	+	519	CCTAAATTTTCTCTCTATCT	20	1	12047
MIR167a	+	519	CCTAAATTTTCTCTCTATC	19	1	143
MIR167a	+	519	CCTAAATTTTCTCTCTAT	18	1	21
MIR167a	+	520	CTAAATTTTCTCTCTATCT	19	1	56699
MIR167a	+	520	CTAAATTTTCTCTCTATC	18	1	461
MIR167a	+	520	CTAAATTTTCTCTCTATCTT	20	1	4
MIR167a	+	521	TAAATTTTCTCTCTATCT	18	1	179
MIR167a	+	638	GAATTTTCACTATATTGTTGTGTGTATGTGGATCTGAAGAATTTATGTTT	50	1	1
MIR167b	+	376	TGAAGCTGCCAGCATGATC	19	3	5
MIR167b	+	376	TGAAGCTGCCAGCATGATCT	20	3	9
MIR167b	+	396	ATCTTTGGTTAAGAGATGAATGTGGAAACATATTGCTTAAACCCAAGCTA	50	1	1
MIR167b	+	479	TTAGGACCATTCATTGATGAAGCATTCCACATGCCGATTGA	41	1	2
MIR167b	+	490	CATTGATGAAGCATTCCACATGCCGATTGA	30	1	2
MIR167b	+	492	TTGATGAAGCATTCCACATGCCGATTGA	28	1	4
MIR167b	+	495	ATGAAGCATTCCACATGCCGATTGA	25	1	2
MIR167b	+	497	GAAGCATTCCACATGCCGATTGA	23	1	8
MIR167b	+	498	AAGCATTCCACATGCCGATTGA	22	1	61
MIR167b	+	499	AGCATTCCACATGCCGATTGA	21	1	86
MIR167b	+	500	GCATTCCACATGCCGATTG	19	1	1
MIR167b	+	500	GCATTCCACATGCCGATTGA	20	1	296
MIR167b	+	501	CATTCCACATGCCGATTGA	19	1	5
MIR167b	+	502	ATTCCACATGCCGATTGA	18	1	235
MIR167c	+	694	AGAAGAAGAAGAAGAAGAAGACATACAGTAAATACT	36	1	3
MIR167c	+	696	AAGAAGAAGAAGAAGAAGACATACAGTAAATACT	34	1	1
MIR167c	+	697	AGAAGAAGAAGAAGAAGACATACAGTAAATACT	33	1	8
MIR167c	+	699	AAGAAGAAGAAGAAGACATACAGTAAATACT	31	1	1
MIR167c	+	703	AGAAGAAGAAGACATACAGTAAATACT	27	1	1
MIR167c	+	704	GAAGAAGAAGACATACAGTAAATACT	26	1	1
MIR167c	+	705	AAGAAGAAGACATACAGTAAATACT	25	1	2
MIR167c	+	706	AGAAGAAGACATACAGTAAATACT	24	1	6
MIR167c	+	707	GAAGAAGACATACAGTAAATACT	23	1	34
MIR167c	+	708	AAGAAGACATACAGTAAATACT	22	1	443
MIR167c	+	709	AGAAGACATACAGTAAATACT	21	1	44
MIR167c	+	710	GAAGACATACAGTAAATACT	20	1	699
MIR167c	+	711	AAGACATACAGTAAATACT	19	1	21
MIR167c	+	712	AGACATACAGTAAATACT	18	1	3
MIR167d	+	654	CTGAAGCTGCCAGCATGA	18	1	1
MIR167d	+	655	TGAAGCTGCCAGCATGATC	19	3	5
MIR167d	+	655	TGAAGCTGCCAGCATGATCT	20	3	9
MIR167d	+	655	TGAAGCTGCCAGCATGATCTGGTAATCGCTACATACGACATACACACATC	50	1	1
MIR167d	+	785	TAGTTATTTGACTGCTTTTAATATATGTTTATGGATTCACGCATGTGTGT	50	1	3
MIR167d	+	999	CACTAAATCACCAACAATGCAAAAAAGATATAAACACTTCATTTCATGAG	50	1	23
MIR167d	+	1015	ATGCAAAAAAGATATAAACACTTCATTTCATGAGAAAG	38	1	6
MIR167d	+	1030	AAACACTTCATTTCATGAGAAAG	23	1	61
MIR167d	+	1031	AACACTTCATTTCATGAGAAAG	22	1	188
MIR167d	+	1032	ACACTTCATTTCATGAGAAA	20	1	1
MIR167d	+	1032	ACACTTCATTTCATGAGAAAG	21	1	377
MIR167d	+	1033	CACTTCATTTCATGAGAAA	19	1	39
MIR167d	+	1033	CACTTCATTTCATGAGAA	18	1	7
MIR167d	+	1033	CACTTCATTTCATGAGAAAG	20	1	14359
MIR167d	+	1034	ACTTCATTTCATGAGAAAG	19	1	22764
MIR167d	+	1034	ACTTCATTTCATGAGAAA	18	1	72
MIR167d	+	1035	CTTCATTTCATGAGAAAG	18	1	49
MIR167d	+	2396	ATATAACATTGTACAATTACAGATGTATGAGAACTATAATATCTAAACAA	50	1	2
MIR168a	+	422	ATAGTAGAGTCTCACCATCGGGCTCGGATTCGCTTGGTGCAGGTCGGGAA	50	1	4
MIR168a	+	438	ATCGGGCTCGGATTCGCTTGGTGCAGGTCGGGAACCAATTCGGCTGACAC	50	1	1
MIR168a	+	450	TTCGCTTGGTGCAGGTCGGGAACCAATTCGGCTGACACAGCCTCGTGACT	50	1	3
MIR168a	+	451	TCGCTTGGTGCAGGTCGGGAACCAATTCGGCTGACACAGCCTCGTGACTT	50	1	2
MIR168a	+	537	CCGCCTTGCATCAACTGAATCGGATCCTCGAGGTGTAAAAAAAC	44	1	5
MIR168a	+	538	CGCCTTGCATCAACTGAATCGGATCCTCGAGGTGTAAAAAAACTCGTAAA	50	1	3
MIR168a	+	545	CATCAACTGAATCGGATCCTCGAGGTGTAAAAAAACTCGTAAATCCTATC	50	1	3
MIR168a	+	551	CTGAATCGGATCCTCGAGGTGTAAAAAAACTCGTAAATCCTATCAGATCT	50	1	3
MIR168a	+	556	TCGGATCCTCGAGGTGTAAAAAAACTCGTAAATCCTATCAGATCTGGAAG	50	1	1
MIR168a	+	557	CGGATCCTCGAGGTGTAAAAAAACTCGTAAATCCTATCAGATCTGGAAGA	50	1	863
MIR168a	+	558	GGATCCTCGAGGTGTAAAAAAACTCGTAAATCCTATCAGATCTGGAAGAT	50	1	29
MIR168a	+	560	ATCCTCGAGGTGTAAAAAAACTCGTAAATCCTATCAGATCTGGAAGATTT	50	1	6
MIR168a	+	561	TCCTCGAGGTGTAAAAAAACTCGTAAATCCTATCAGATCTGGAAGATTTC	50	1	11
MIR168a	+	566	GAGGTGTAAAAAAACTCGTAAATCCTATCAGATCTGGAAGATT	43	1	1
MIR168a	+	567	AGGTGTAAAAAAACTCGTAAATCCTATCAGATCTGGAAGATT	42	1	4
MIR168a	+	568	GGTGTAAAAAAACTCGTAAATCCTATCAGATCTGGAAGATT	41	1	3
MIR168a	+	574	AAAAAACTCGTAAATCCTATCAGATCTGGAAGATT	35	1	7
MIR168a	+	575	AAAAACTCGTAAATCCTATCAGATCTGGAAGATT	34	1	5
MIR168a	+	579	ACTCGTAAATCCTATCAGATCTGGAAGATT	30	1	3
MIR168a	+	580	CTCGTAAATCCTATCAGATCTGGAAGATT	29	1	2
MIR168a	+	581	TCGTAAATCCTATCAGATCTGGAAGATT	28	1	2
MIR168a	+	584	TAAATCCTATCAGATCTGGAAGATT	25	1	17
MIR168a	+	585	AAATCCTATCAGATCTGGAAGATT	24	1	178
MIR168a	+	586	AATCCTATCAGATCTGGAAGATT	23	1	213
MIR168a	+	587	ATCCTATCAGATCTGGAAGAT	21	1	15
MIR168a	+	587	ATCCTATCAGATCTGGAAGATT	22	1	1540
MIR168a	+	588	TCCTATCAGATCTGGAAGATT	21	1	833
MIR168a	+	588	TCCTATCAGATCTGGAAGAT	20	1	5
MIR168a	+	589	CCTATCAGATCTGGAAGATT	20	1	38074
MIR168a	+	589	CCTATCAGATCTGGAAGA	18	1	5
MIR168a	+	589	CCTATCAGATCTGGAAGAT	19	1	183
MIR168a	+	589	CCTATCAGATCTGGAAGATTT	21	1	3
MIR168a	+	590	CTATCAGATCTGGAAGAT	18	1	952
MIR168a	+	590	CTATCAGATCTGGAAGATT	19	1	155378
MIR168a	+	590	CTATCAGATCTGGAAGATTT	20	1	10
MIR168a	+	591	TATCAGATCTGGAAGATT	18	1	785
MIR168a	+	591	TATCAGATCTGGAAGATTT	19	1	1
MIR168a	+	833	TGTTTCGAAATTTTAGGATTTGTAGATGTAGGAGTATGAGGACTCTTGAA	50	1	4
MIR168a	+	1129	GTTTATAATTGTGGCTTTACGATTTAACAATTCACTCTGTGTGACTTTGT	50	1	1
MIR168a	+	1217	GAGAGGATTCATTGGAGGCATGTGAAGTGAAGATATTTTTTTGTTTTCCA	50	1	1
MIR168b	+	481	TCTTGTATCAACTGAATCGGAGTCCGAGGTGAAAAAATAAGGATCCAACT	50	1	3
MIR168b	+	492	CTGAATCGGAGTCCGAGGTGAAAAAATAAGGATCCAACTATCAGATCTGA	50	1	1
MIR168b	+	498	CGGAGTCCGAGGTGAAAAAATAAGGATCCAACTATCAGATCTGACACAAT	50	1	64
MIR168b	+	520	AGGATCCAACTATCAGATCTGACACAATT	29	1	6
MIR168b	+	523	ATCCAACTATCAGATCTGACACAATT	26	1	1
MIR168b	+	526	CAACTATCAGATCTGACACAATT	23	1	17
MIR168b	+	527	AACTATCAGATCTGACACAATT	22	1	169
MIR168b	+	527	AACTATCAGATCTGACACAAT	21	1	8
MIR168b	+	528	ACTATCAGATCTGACACAATT	21	1	558
MIR168b	+	528	ACTATCAGATCTGACACAAT	20	1	15
MIR168b	+	529	CTATCAGATCTGACACAAT	19	1	129
MIR168b	+	529	CTATCAGATCTGACACAATT	20	1	9913
MIR168b	+	530	TATCAGATCTGACACAATT	19	1	16698
MIR168b	+	530	TATCAGATCTGACACAAT	18	1	267
MIR168b	+	531	ATCAGATCTGACACAATT	18	1	330
MIR169a	+	582	TTGGCTACACGTTACTTTGTGTCGCGCATAGGTGTTATATGGTAAAGATC	50	1	4
MIR169a	+	583	TGGCTACACGTTACTTTGTGTCGCGCATAGGTGTTATATGGTAAAGATCG	50	1	4
MIR169a	+	591	CGTTACTTTGTGTCGCGCATAGGTGTTATATGGTAAAGATCGCAAGAACT	50	1	18
MIR169a	+	617	TATATGGTAAAGATCGCAAGAACTC	25	1	4
MIR169a	+	618	ATATGGTAAAGATCGCAAGAACTC	24	1	248
MIR169a	+	619	TATGGTAAAGATCGCAAGAACTC	23	1	148
MIR169a	+	620	ATGGTAAAGATCGCAAGAACT	21	1	9
MIR169a	+	620	ATGGTAAAGATCGCAAGAACTC	22	1	1450
MIR169a	+	621	TGGTAAAGATCGCAAGAACTC	21	1	693
MIR169a	+	622	GGTAAAGATCGCAAGAACT	19	1	104
MIR169a	+	622	GGTAAAGATCGCAAGAACTC	20	1	87152
MIR169a	+	622	GGTAAAGATCGCAAGAAC	18	1	14
MIR169a	+	623	GTAAAGATCGCAAGAACTC	19	1	253
MIR169a	+	624	TAAAGATCGCAAGAACTC	18	1	92
MIR169b	+	643	CTTGGGATATTCTACCTTTTCATT	24	1	18
MIR169b	+	644	TTGGGATATTCTACCTTTTCATT	23	1	2
MIR169b	+	645	TGGGATATTCTACCTTTTCATT	22	1	40
MIR169b	+	646	GGGATATTCTACCTTTTCATT	21	1	85
MIR169b	+	647	GGATATTCTACCTTTTCATT	20	1	1744
MIR169b	+	647	GGATATTCTACCTTTTCAT	19	1	11
MIR169b	+	648	GATATTCTACCTTTTCATT	19	1	4
MIR169b	+	649	ATATTCTACCTTTTCATT	18	1	31
MIR169c	+	954	CTTACGATGACACGTAAAAAATCC	24	1	15
MIR169c	+	955	TTACGATGACACGTAAAAAATCC	23	1	122
MIR169c	+	956	TACGATGACACGTAAAAAATCC	22	1	378
MIR169c	+	956	TACGATGACACGTAAAAAATC	21	1	8
MIR169c	+	957	ACGATGACACGTAAAAAATC	20	1	1
MIR169c	+	957	ACGATGACACGTAAAAAATCC	21	1	1529
MIR169c	+	958	CGATGACACGTAAAAAATCC	20	1	9005
MIR169c	+	958	CGATGACACGTAAAAAATC	19	1	73
MIR169c	+	958	CGATGACACGTAAAAAATCCC	21	1	3
MIR169c	+	959	GATGACACGTAAAAAATCC	19	1	37422
MIR169c	+	959	GATGACACGTAAAAAATC	18	1	261
MIR169c	+	959	GATGACACGTAAAAAATCCC	20	1	3
MIR169c	+	960	ATGACACGTAAAAAATCC	18	1	370
MIR169d	+	629	TCTAGATATCTCTATCCGTTATAT	24	1	9
MIR169d	+	630	CTAGATATCTCTATCCGTTATAT	23	1	2
MIR169d	+	631	TAGATATCTCTATCCGTTATAT	22	1	27
MIR169d	+	632	AGATATCTCTATCCGTTATAT	21	1	76
MIR169d	+	633	GATATCTCTATCCGTTAT	18	1	10
MIR169d	+	633	GATATCTCTATCCGTTATAT	20	1	4652
MIR169d	+	633	GATATCTCTATCCGTTATA	19	1	16
MIR169d	+	634	ATATCTCTATCCGTTATAT	19	1	7
MIR169d	+	635	TATCTCTATCCGTTATAT	18	1	4
MIR169e	+	583	CAAACTCTAGATACCTAACCACATATCAT	29	1	4
MIR169e	+	588	TCTAGATACCTAACCACATATCAT	24	1	37
MIR169e	+	589	CTAGATACCTAACCACATATCAT	23	1	107
MIR169e	+	590	TAGATACCTAACCACATATCAT	22	1	377
MIR169e	+	591	AGATACCTAACCACATATCAT	21	1	6509
MIR169e	+	591	AGATACCTAACCACATATCA	20	1	45
MIR169e	+	591	AGATACCTAACCACATAT	18	1	3
MIR169e	+	592	GATACCTAACCACATATCAT	20	1	42898
MIR169e	+	592	GATACCTAACCACATATC	18	1	2
MIR169e	+	592	GATACCTAACCACATATCA	19	1	387
MIR169e	+	593	ATACCTAACCACATATCAT	19	1	138
MIR169e	+	594	TACCTAACCACATATCAT	18	1	57
MIR169f	+	712	GATTCCAGATATACATTAGTCATGA	25	1	12
MIR169f	+	713	ATTCCAGATATACATTAGTCATGA	24	1	85
MIR169f	+	713	ATTCCAGATATACATTAGTCATG	23	1	4
MIR169f	+	714	TTCCAGATATACATTAGTCATGA	23	1	248
MIR169f	+	715	TCCAGATATACATTAGTCATGA	22	1	203
MIR169f	+	715	TCCAGATATACATTAGTCATG	21	1	2
MIR169f	+	716	CCAGATATACATTAGTCA	18	1	1
MIR169f	+	716	CCAGATATACATTAGTCATGA	21	1	2200
MIR169f	+	717	CAGATATACATTAGTCATGA	20	1	23817
MIR169f	+	717	CAGATATACATTAGTCATG	19	1	35
MIR169f	+	718	AGATATACATTAGTCATGA	19	1	62504
MIR169f	+	718	AGATATACATTAGTCATG	18	1	64
MIR169f	+	719	GATATACATTAGTCATGA	18	1	32
MIR169g	+	766	TCTGTTTCCTTCTCTTCTTTTGGATGTCAGACTCCAAGATATCTATCATC	50	1	8
MIR169g	+	792	TCAGACTCCAAGATATCTATCATCATGA	28	1	2
MIR169g	+	793	CAGACTCCAAGATATCTATCATCATGA	27	1	1
MIR169g	+	796	ACTCCAAGATATCTATCATCATGA	24	1	49
MIR169g	+	797	CTCCAAGATATCTATCATCATGA	23	1	207
MIR169g	+	798	TCCAAGATATCTATCATCATGA	22	1	688
MIR169g	+	799	CCAAGATATCTATCATCATGA	21	1	8617
MIR169g	+	799	CCAAGATATCTATCATCAT	19	1	4
MIR169g	+	799	CCAAGATATCTATCATCATG	20	1	35
MIR169g	+	800	CAAGATATCTATCATCAT	18	1	13
MIR169g	+	800	CAAGATATCTATCATCATG	19	1	438
MIR169g	+	800	CAAGATATCTATCATCATGA	20	1	82279
MIR169g	+	801	AAGATATCTATCATCATG	18	1	634
MIR169g	+	801	AAGATATCTATCATCATGA	19	1	129060
MIR169g	+	802	AGATATCTATCATCATGA	18	1	119
MIR169h	+	851	ATTCTCTTCATTCACATTTCTCTTTTTTGGGAAACTTAA	39	1	6
MIR169h	+	860	ATTCACATTTCTCTTTTTTGGGAAACTTAA	30	1	23
MIR169h	+	865	CATTTCTCTTTTTTGGGAAACTTAA	25	1	21
MIR169h	+	866	ATTTCTCTTTTTTGGGAAACTTAA	24	1	173
MIR169h	+	867	TTTCTCTTTTTTGGGAAACTTAA	23	1	263
MIR169h	+	868	TTCTCTTTTTTGGGAAACTTA	21	1	6
MIR169h	+	868	TTCTCTTTTTTGGGAAACTTAA	22	1	574
MIR169h	+	869	TCTCTTTTTTGGGAAACTTAA	21	1	674
MIR169h	+	870	CTCTTTTTTGGGAAACTTA	19	1	63
MIR169h	+	870	CTCTTTTTTGGGAAACTTAA	20	1	23887
MIR169h	+	871	TCTTTTTTGGGAAACTTAA	19	1	28610
MIR169h	+	871	TCTTTTTTGGGAAACTTA	18	1	78
MIR169h	+	872	CTTTTTTGGGAAACTTAA	18	1	866
MIR169j	+	853	CTTTTTTCATTCACGTTATACCTGTTTTTCTTTCTGTCTCC	41	1	8
MIR169j	+	862	TTCACGTTATACCTGTTTTTCTTTCTGTCTCC	32	1	5
MIR169j	+	866	CGTTATACCTGTTTTTCTTTCTGTCTCC	28	1	3
MIR169j	+	868	TTATACCTGTTTTTCTTTCTGTCTCC	26	1	24
MIR169j	+	869	TATACCTGTTTTTCTTTCTGTCTCC	25	1	31
MIR169j	+	870	ATACCTGTTTTTCTTTCTGTCTCC	24	1	111
MIR169j	+	871	TACCTGTTTTTCTTTCTGTCTCC	23	1	708
MIR169j	+	872	ACCTGTTTTTCTTTCTGTCTCC	22	1	476
MIR169j	+	873	CCTGTTTTTCTTTCTGTCTC	20	1	9
MIR169j	+	873	CCTGTTTTTCTTTCTGTCTCC	21	1	3238
MIR169j	+	874	CTGTTTTTCTTTCTGTCTC	19	1	373
MIR169j	+	874	CTGTTTTTCTTTCTGTCT	18	1	8
MIR169j	+	874	CTGTTTTTCTTTCTGTCTCC	20	1	60706
MIR169j	+	875	TGTTTTTCTTTCTGTCTCC	19	1	102305
MIR169j	+	875	TGTTTTTCTTTCTGTCTC	18	1	698
MIR169j	+	876	GTTTTTCTTTCTGTCTCC	18	1	192
MIR169k	+	712	TTATACTTATTTTTCTGTCTTCCGAATCACTAGAAATTCACTTTAAAAAA	50	1	1
MIR169k	+	712	TTATACTTATTTTTCTGTCTTCCGAATCACTAGA	34	1	26
MIR169k	+	721	TTTTTCTGTCTTCCGAATCACTAGA	25	1	4
MIR169k	+	722	TTTTCTGTCTTCCGAATCACTAGA	24	1	6
MIR169k	+	723	TTTCTGTCTTCCGAATCACTAGA	23	1	69
MIR169k	+	724	TTCTGTCTTCCGAATCACTAGA	22	1	56
MIR169k	+	725	TCTGTCTTCCGAATCACTAGA	21	1	19
MIR169k	+	726	CTGTCTTCCGAATCACTAGAA	21	1	1
MIR169k	+	726	CTGTCTTCCGAATCACTAG	19	1	53
MIR169k	+	726	CTGTCTTCCGAATCACTAGA	20	1	4648
MIR169k	+	726	CTGTCTTCCGAATCACTA	18	1	1
MIR169k	+	727	TGTCTTCCGAATCACTAG	18	1	62
MIR169k	+	727	TGTCTTCCGAATCACTAGA	19	1	7357
MIR169k	+	728	GTCTTCCGAATCACTAGA	18	1	26
MIR169k	+	1054	ACTCAGATATTTACCTTCATCCAAAATAAGATA	33	1	5
MIR169k	+	1062	ATTTACCTTCATCCAAAATAAGATA	25	1	1
MIR169k	+	1063	TTTACCTTCATCCAAAATAAGATA	24	1	29
MIR169k	+	1064	TTACCTTCATCCAAAATAAGATA	23	1	18
MIR169k	+	1065	TACCTTCATCCAAAATAAGATA	22	1	43
MIR169k	+	1066	ACCTTCATCCAAAATAAGATA	21	1	301
MIR169k	+	1066	ACCTTCATCCAAAATAAGA	19	1	7
MIR169k	+	1066	ACCTTCATCCAAAATAAGAT	20	1	5
MIR169k	+	1067	CCTTCATCCAAAATAAGA	18	1	152
MIR169k	+	1067	CCTTCATCCAAAATAAGATA	20	1	6973
MIR169k	+	1067	CCTTCATCCAAAATAAGAT	19	1	28
MIR169k	+	1068	CTTCATCCAAAATAAGAT	18	1	131
MIR169k	+	1068	CTTCATCCAAAATAAGATA	19	1	43767
MIR169k	+	1069	TTCATCCAAAATAAGATA	18	1	230
MIR169m	+	959	ATGTTATACCTACTTTTCTTTCTGTCTTCAAA	32	1	7
MIR169m	+	962	TTATACCTACTTTTCTTTCTGTCTTCAAA	29	1	5
MIR169m	+	965	TACCTACTTTTCTTTCTGTCTTCAAA	26	1	5
MIR169m	+	968	CTACTTTTCTTTCTGTCTTCAAA	23	1	174
MIR169m	+	969	TACTTTTCTTTCTGTCTTCAAAA	23	1	1
MIR169m	+	969	TACTTTTCTTTCTGTCTTCAAA	22	1	157
MIR169m	+	970	ACTTTTCTTTCTGTCTTCAA	20	1	3
MIR169m	+	970	ACTTTTCTTTCTGTCTTCAAA	21	1	975
MIR169m	+	970	ACTTTTCTTTCTGTCTTCA	19	1	4
MIR169m	+	971	CTTTTCTTTCTGTCTTCA	18	1	88
MIR169m	+	971	CTTTTCTTTCTGTCTTCAA	19	1	504
MIR169m	+	971	CTTTTCTTTCTGTCTTCAAA	20	1	107819
MIR169m	+	972	TTTTCTTTCTGTCTTCAA	18	1	1440
MIR169m	+	972	TTTTCTTTCTGTCTTCAAAA	20	1	2
MIR169m	+	972	TTTTCTTTCTGTCTTCAAA	19	1	256319
MIR169m	+	972	TTTTCTTTCTGTCTTCAAAAT	21	1	1
MIR169m	+	973	TTTCTTTCTGTCTTCAAA	18	1	1427
MIR169m	+	1311	CATCTCAGACGTTTACCTTCATTCAAAAT	29	1	1
MIR169m	+	1318	GACGTTTACCTTCATTCAAAAT	22	1	6
MIR169m	+	1319	ACGTTTACCTTCATTCAAAAT	21	1	201
MIR169m	+	1320	CGTTTACCTTCATTCAAAA	19	1	25
MIR169m	+	1320	CGTTTACCTTCATTCAAAAT	20	1	8534
MIR169m	+	1321	GTTTACCTTCATTCAAAATAAGATG	25	1	1
MIR169m	+	1321	GTTTACCTTCATTCAAAA	18	1	69
MIR169m	+	1321	GTTTACCTTCATTCAAAAT	19	1	39256
MIR169m	+	1322	TTTACCTTCATTCAAAAT	18	1	278
MIR170	+	407	TCAGTCCTCTCTCGTCGCTTCTCTCGTATTTTGAAGTTTGCCTCGTTAGG	50	1	1
MIR170	+	428	TCTCGTATTTTGAAGTTTGCCTCGTTAGGTC	31	1	8
MIR170	+	434	ATTTTGAAGTTTGCCTCGTTAGGTC	25	1	18
MIR170	+	435	TTTTGAAGTTTGCCTCGTTAGGTC	24	1	12
MIR170	+	436	TTTGAAGTTTGCCTCGTTAGGTC	23	1	7
MIR170	+	437	TTGAAGTTTGCCTCGTTAGGTC	22	1	40
MIR170	+	438	TGAAGTTTGCCTCGTTAGGTC	21	1	656
MIR170	+	439	GAAGTTTGCCTCGTTAGG	18	1	1
MIR170	+	439	GAAGTTTGCCTCGTTAGGTC	20	1	4221
MIR170	+	439	GAAGTTTGCCTCGTTAGGT	19	1	14
MIR170	+	440	AAGTTTGCCTCGTTAGGTC	19	1	8
MIR171a	+	410	CTTTGATATCCGCACTTTAAGCATGAGAGAGTCCCTTTGATATTGGCCTG	50	1	1
MIR171a	+	443	CCTTTGATATTGGCCTGGTTCACTCAGATCTTACCTGACCACACACGTAG	50	1	6
MIR171a	+	519	TGATTGAGCCGCGCCAATA	19	1	12
MIR171a	+	520	GATTGAGCCGCGCCAATA	18	1	3
MIR171a	+	540	TCAGTACTCTCTCGTCTCTATTTTGGACTTTGTGGTCTTGTAGATCGATT	50	1	127
MIR171a	+	557	CTATTTTGGACTTTGTGGTCTTGTAGATCGATTT	34	1	12
MIR171a	+	560	TTTTGGACTTTGTGGTCTTGTAGATCGATTT	31	1	10
MIR171a	+	563	TGGACTTTGTGGTCTTGTAGATCGATTT	28	1	3
MIR171a	+	566	ACTTTGTGGTCTTGTAGATCGATTT	25	1	1
MIR171a	+	567	CTTTGTGGTCTTGTAGATCGATTT	24	1	26
MIR171a	+	568	TTTGTGGTCTTGTAGATCGATTT	23	1	326
MIR171a	+	569	TTGTGGTCTTGTAGATCGATT	21	1	3
MIR171a	+	569	TTGTGGTCTTGTAGATCGATTT	22	1	1389
MIR171a	+	570	TGTGGTCTTGTAGATCGATTT	21	1	1732
MIR171a	+	570	TGTGGTCTTGTAGATCGATT	20	1	12
MIR171a	+	571	GTGGTCTTGTAGATCGATT	19	1	496
MIR171a	+	571	GTGGTCTTGTAGATCGAT	18	1	5
MIR171a	+	571	GTGGTCTTGTAGATCGATTT	20	1	126337
MIR171a	+	572	TGGTCTTGTAGATCGATTT	19	1	42
MIR171a	+	573	GGTCTTGTAGATCGATTT	18	1	59
MIR171b	+	613	TTGAGCCGTGCCAATATCACGCGGTAAACCAAAAATGGCAAAGATAGTTA	50	1	34
MIR171b	+	615	GAGCCGTGCCAATATCACGCGGTAAACCAAAAATGGCAAAGATAGTTATT	50	1	10
MIR171b	+	634	CGGTAAACCAAAAATGGCAAAGATAGTTATTATAACCTTAAAGGTATGTA	50	1	135
MIR171b	+	648	TGGCAAAGATAGTTATTATAACCTTAAAGGTATGTATCATT	41	1	3
MIR171b	+	650	GCAAAGATAGTTATTATAACCTTAAAGGTATGTATCATT	39	1	6
MIR171b	+	656	ATAGTTATTATAACCTTAAAGGTATGTATCATT	33	1	1
MIR171b	+	658	AGTTATTATAACCTTAAAGGTATGTATCATT	31	1	4
MIR171b	+	660	TTATTATAACCTTAAAGGTATGTATCATT	29	1	29
MIR171b	+	661	TATTATAACCTTAAAGGTATGTATCATT	28	1	48
MIR171b	+	662	ATTATAACCTTAAAGGTATGTATCATT	27	1	4
MIR171b	+	663	TTATAACCTTAAAGGTATGTATCATT	26	1	12
MIR171b	+	664	TATAACCTTAAAGGTATGTATCATT	25	1	22
MIR171b	+	665	ATAACCTTAAAGGTATGTATCATT	24	1	20
MIR171b	+	666	TAACCTTAAAGGTATGTATCATT	23	1	13
MIR171b	+	667	AACCTTAAAGGTATGTATCATT	22	1	142
MIR171b	+	668	ACCTTAAAGGTATGTATCATT	21	1	234
MIR171b	+	669	CCTTAAAGGTATGTATCATT	20	1	1381
MIR171b	+	669	CCTTAAAGGTATGTATCAT	19	1	11
MIR171b	+	670	CTTAAAGGTATGTATCAT	18	1	185
MIR171b	+	670	CTTAAAGGTATGTATCATT	19	1	36466
MIR171b	+	671	TTAAAGGTATGTATCATT	18	1	293
MIR171c	+	556	TCTTTTGTTTTAAAGATCGGTTTATTTGATTGAGCCGTGCCAATATCACG	50	1	3
MIR171c	+	585	TTGAGCCGTGCCAATATCACGCGTTTAAATAGTTTAAAGATTCTATGTTA	50	1	42
MIR171c	+	586	TGAGCCGTGCCAATATCACGCGTTTAAATAGTTTAAAGATTCTATGTTAG	50	1	1
MIR171c	+	600	ATCACGCGTTTAAATAGTTTAAAGATTCTATGTTAGTTGATGTGATCAAT	50	1	3
MIR171c	+	606	CGTTTAAATAGTTTAAAGATTCTATGTTAGTTGATGTGATCAATCAAGGT	50	1	1
MIR171c	+	613	ATAGTTTAAAGATTCTATGTTAGTTGATGTGATCAATCAAGGTAT	45	1	4
MIR171c	+	626	TCTATGTTAGTTGATGTGATCAATCAAGGTAT	32	1	21
MIR171c	+	634	AGTTGATGTGATCAATCAAGGTAT	24	1	48
MIR171c	+	635	GTTGATGTGATCAATCAAGGTAT	23	1	416
MIR171c	+	635	GTTGATGTGATCAATCAAGGTA	22	1	6
MIR171c	+	636	TTGATGTGATCAATCAAGGTAT	22	1	871
MIR171c	+	636	TTGATGTGATCAATCAAGGTA	21	1	1
MIR171c	+	637	TGATGTGATCAATCAAGGTAT	21	1	2612
MIR171c	+	637	TGATGTGATCAATCAAGGTA	20	1	15
MIR171c	+	637	TGATGTGATCAATCAAGGT	19	1	3
MIR171c	+	638	GATGTGATCAATCAAGGT	18	1	3
MIR171c	+	638	GATGTGATCAATCAAGGTA	19	1	145
MIR171c	+	638	GATGTGATCAATCAAGGTAT	20	1	61300
MIR171c	+	639	ATGTGATCAATCAAGGTAT	19	1	226
MIR171c	+	640	TGTGATCAATCAAGGTAT	18	1	22
MIR171c	+	641	GTGATCAATCAAGGTATG	18	1	2
MIR172a	+	675	CTCTCTCTCTCTCTCTCTC	19	11	9
MIR172a	+	675	CTCTCTCTCTCTCTCTCTCTC	21	7	2
MIR172a	+	677	CTCTCTCTCTCTCTCTCTC	19	11	9
MIR172a	+	1289	GTGGCATCATCAAGATTCACATCTGTTGATGGACGGTGGTGATTCACTCT	50	1	19
MIR172a	+	1371	ATGATGCTGCATCGGCAATCAACGACTATTCTTTCCCTCTCTCTCTCTCT	50	1	3
MIR172a	+	1375	TGCTGCATCGGCAATCAACGACTATTCTTTCCCTCTCTCTCTCTCTCCCT	50	1	2
MIR172a	+	1377	CTGCATCGGCAATCAACGACTATTCTTTCCCTCTCTCTCTCTCTCCCTCT	50	1	3
MIR172a	+	1383	CGGCAATCAACGACTATTCTTTCCCTCTCTCTCTCTCTCCCTCTGTATAG	50	1	70
MIR172a	+	1390	CAACGACTATTCTTTCCCTCTCTCTCTCTCTCCCTCTGTATAGATTATTT	50	1	4
MIR172a	+	1396	CTATTCTTTCCCTCTCTCTCTCTCTCCCTCTGTATAGATTATT	43	1	3
MIR172a	+	1397	TATTCTTTCCCTCTCTCTCTCTCTCCCTCTGTATAGATTATT	42	1	1
MIR172a	+	1404	TCCCTCTCTCTCTCTCTCCCTCTGTATAGATTATT	35	1	2
MIR172a	+	1405	CCCTCTCTCTCTCTCTCCCTCTGTATAGATTATT	34	1	1
MIR172a	+	1406	CCTCTCTCTCTCTCTCCCTCTGTATAGATTATT	33	1	8
MIR172a	+	1407	CTCTCTCTCTCTCTCCCTCTGTATAGATTATT	32	1	186
MIR172a	+	1408	TCTCTCTCTCTCTCCCTCTGTATAGATTATT	31	1	234
MIR172a	+	1409	CTCTCTCTCTCTCCCTCTGTATAGATTATT	30	1	189
MIR172a	+	1410	TCTCTCTCTCTCCCTCTGTATAGATTATT	29	1	353
MIR172a	+	1411	CTCTCTCTCTCCCTCTGTATAGATTAT	27	1	7
MIR172a	+	1411	CTCTCTCTCTCCCTCTGTATAGATTATT	28	1	507
MIR172a	+	1412	TCTCTCTCTCCCTCTGTATAGATTATT	27	1	842
MIR172a	+	1413	CTCTCTCTCCCTCTGTATAGATTAT	25	1	7
MIR172a	+	1413	CTCTCTCTCCCTCTGTATAGATTATT	26	1	992
MIR172a	+	1414	TCTCTCTCCCTCTGTATAGATTATT	25	1	1665
MIR172a	+	1414	TCTCTCTCCCTCTGTATAGATTAT	24	1	2
MIR172a	+	1415	CTCTCTCCCTCTGTATAGATTAT	23	1	19
MIR172a	+	1415	CTCTCTCCCTCTGTATAGATTATT	24	1	3525
MIR172a	+	1416	TCTCTCCCTCTGTATAGATTAT	22	1	23
MIR172a	+	1416	TCTCTCCCTCTGTATAGATTATT	23	1	4967
MIR172a	+	1417	CTCTCCCTCTGTATAGATTAT	21	1	67
MIR172a	+	1417	CTCTCCCTCTGTATAGATTATT	22	1	16662
MIR172a	+	1418	TCTCCCTCTGTATAGATTATTT	22	1	7
MIR172a	+	1418	TCTCCCTCTGTATAGATTATT	21	1	36912
MIR172a	+	1418	TCTCCCTCTGTATAGATTAT	20	1	156
MIR172a	+	1419	CTCCCTCTGTATAGATTAT	19	1	2703
MIR172a	+	1419	CTCCCTCTGTATAGATTA	18	1	43
MIR172a	+	1419	CTCCCTCTGTATAGATTATT	20	1	698976
MIR172a	+	1419	CTCCCTCTGTATAGATTATTT	21	1	77
MIR172a	+	1420	TCCCTCTGTATAGATTATTT	20	1	158
MIR172a	+	1420	TCCCTCTGTATAGATTAT	18	1	4986
MIR172a	+	1420	TCCCTCTGTATAGATTATT	19	1	1256617
MIR172a	+	1421	CCCTCTGTATAGATTATT	18	1	8625
MIR172b	+	682	TGCTGCATCAACAATCGACGGCTACAAATACCTAAAGCTTGAGAAAGAAA	50	1	2
MIR172b	+	688	ATCAACAATCGACGGCTACAAATACCTAAAGCTTGAGAAAGAAACTTGAA	50	1	5
MIR172b	+	690	CAACAATCGACGGCTACAAATACCTAAAGCTTGAGAAAGAAACTTGAAGA	50	1	143
MIR172b	+	691	AACAATCGACGGCTACAAATACCTAAAGCTTGAGAAAGAAACTTGAAGAT	50	1	7
MIR172b	+	692	ACAATCGACGGCTACAAATACCTAAAGCTTGAGAAAGAAACTTGAAGATA	50	1	2
MIR172b	+	693	CAATCGACGGCTACAAATACCTAAAGCTTGAGAAAGAAACTTGAAGATAT	50	1	6
MIR172b	+	697	CGACGGCTACAAATACCTAAAGCTTGAGAAAGAAACTTGAAGATA	45	1	7
MIR172b	+	705	ACAAATACCTAAAGCTTGAGAAAGAAACTTGAAGATA	37	1	2
MIR172b	+	708	AATACCTAAAGCTTGAGAAAGAAACTTGAAGATA	34	1	1
MIR172b	+	714	TAAAGCTTGAGAAAGAAACTTGAAGATA	28	1	8
MIR172b	+	715	AAAGCTTGAGAAAGAAACTTGAAGATA	27	1	1
MIR172b	+	716	AAGCTTGAGAAAGAAACTTGAAGATA	26	1	7
MIR172b	+	717	AGCTTGAGAAAGAAACTTGAAGATA	25	1	85
MIR172b	+	718	GCTTGAGAAAGAAACTTGAAGATA	24	1	147
MIR172b	+	719	CTTGAGAAAGAAACTTGAAGATA	23	1	710
MIR172b	+	719	CTTGAGAAAGAAACTTGAAGAT	22	1	1
MIR172b	+	720	TTGAGAAAGAAACTTGAAGA	20	1	1
MIR172b	+	720	TTGAGAAAGAAACTTGAAGATA	22	1	5148
MIR172b	+	720	TTGAGAAAGAAACTTGAAGAT	21	1	17
MIR172b	+	721	TGAGAAAGAAACTTGAAGATA	21	1	6410
MIR172b	+	721	TGAGAAAGAAACTTGAAGAT	20	1	5
MIR172b	+	722	GAGAAAGAAACTTGAAGA	18	1	7
MIR172b	+	722	GAGAAAGAAACTTGAAGATA	20	1	143091
MIR172b	+	722	GAGAAAGAAACTTGAAGATAT	21	1	1
MIR172b	+	722	GAGAAAGAAACTTGAAGAT	19	1	268
MIR172b	+	723	AGAAAGAAACTTGAAGATA	19	1	142
MIR172b	+	724	GAAAGAAACTTGAAGATA	18	1	79
MIR172c	+	939	GGTTTGTGTTGATTGGAAATTTCAT	25	1	3
MIR172c	+	940	GTTTGTGTTGATTGGAAATTTCAT	24	1	67
MIR172c	+	941	TTTGTGTTGATTGGAAATTTCA	22	1	13
MIR172c	+	941	TTTGTGTTGATTGGAAATTTCAT	23	1	337
MIR172c	+	942	TTGTGTTGATTGGAAATTTCAT	22	1	920
MIR172c	+	942	TTGTGTTGATTGGAAATTTCA	21	1	1
MIR172c	+	943	TGTGTTGATTGGAAATTTCAT	21	1	1660
MIR172c	+	944	GTGTTGATTGGAAATTTCAT	20	1	19673
MIR172c	+	944	GTGTTGATTGGAAATTTCA	19	1	53
MIR172c	+	945	TGTTGATTGGAAATTTCAT	19	1	42
MIR172c	+	946	GTTGATTGGAAATTTCAT	18	1	305
MIR172d	-	84	TATCTTCAATTCCTTTCTC	19	1
MIR172d	+	511	CGGCAATTAAATGGCTTACTTATCTAGGGTCTTTTTTTCCATTTTCATCA	50	1	38
MIR172d	+	512	GGCAATTAAATGGCTTACTTATCTAGGGTCTTTTTTTCCATTTTCATCAT	50	1	12
MIR172d	+	539	GTCTTTTTTTCCATTTTCATCATGTGGTTA	30	1	7
MIR172d	+	540	TCTTTTTTTCCATTTTCATCATGTGGTTA	29	1	1
MIR172d	+	541	CTTTTTTTCCATTTTCATCATGTGGTTA	28	1	20
MIR172d	+	543	TTTTTTCCATTTTCATCATGTGGTTA	26	1	17
MIR172d	+	544	TTTTTCCATTTTCATCATGTGGTTA	25	1	116
MIR172d	+	545	TTTTCCATTTTCATCATGTGGTTA	24	1	765
MIR172d	+	546	TTTCCATTTTCATCATGTGGTT	22	1	1
MIR172d	+	546	TTTCCATTTTCATCATGTGGTTA	23	1	1881
MIR172d	+	547	TTCCATTTTCATCATGTGGTTA	22	1	2173
MIR172d	+	548	TCCATTTTCATCATGTGGTT	20	1	9
MIR172d	+	548	TCCATTTTCATCATGTGGTTA	21	1	5024
MIR172d	+	549	CCATTTTCATCATGTGGTT	19	1	107
MIR172d	+	549	CCATTTTCATCATGTGGT	18	1	34
MIR172d	+	549	CCATTTTCATCATGTGGTTA	20	1	110065
MIR172d	+	550	CATTTTCATCATGTGGTTA	19	1	478846
MIR172d	+	550	CATTTTCATCATGTGGTTAA	20	1	5
MIR172d	+	550	CATTTTCATCATGTGGTT	18	1	649
MIR172d	+	551	ATTTTCATCATGTGGTTA	18	1	3433
MIR172d	+	560	ATGTGGTTAATCAGAAATCCAGATCCTCATATGTAGAATCCTCCGATATG	50	1	2
MIR172e	+	614	TCTTTTTTGTCATTCTCTAGTGAAGAGA	28	1	5
MIR172e	+	616	TTTTTTGTCATTCTCTAGTGAAGAGA	26	1	7
MIR172e	+	617	TTTTTGTCATTCTCTAGTGAAGAGA	25	1	1
MIR172e	+	618	TTTTGTCATTCTCTAGTGAAGAGA	24	1	6
MIR172e	+	619	TTTGTCATTCTCTAGTGAAGAGA	23	1	6
MIR172e	+	620	TTGTCATTCTCTAGTGAAGAGA	22	1	64
MIR172e	+	621	TGTCATTCTCTAGTGAAGAGA	21	1	107
MIR172e	+	622	GTCATTCTCTAGTGAAGAGA	20	1	1844
MIR172e	+	622	GTCATTCTCTAGTGAAGAG	19	1	11
MIR172e	+	623	TCATTCTCTAGTGAAGAGA	19	1	4
MIR172e	+	624	CATTCTCTAGTGAAGAGA	18	1	32
MIR173	+	543	GAAAGAGCTTGCTCCCTAAACTTATCTCTCTGATGATTTAATGTTAGAGA	50	1	4
MIR173	+	548	AGCTTGCTCCCTAAACTTATCTCTCTGATGATTTAATGTTAGAGATCTTC	50	1	5
MIR173	+	569	TCTCTGATGATTTAATGTTAGAGATCTT	28	1	4
MIR173	+	571	TCTGATGATTTAATGTTAGAGATCTT	26	1	9
MIR173	+	573	TGATGATTTAATGTTAGAGATCTT	24	1	7
MIR173	+	574	GATGATTTAATGTTAGAGATCTT	23	1	39
MIR173	+	575	ATGATTTAATGTTAGAGATCT	21	1	2
MIR173	+	575	ATGATTTAATGTTAGAGATCTT	22	1	286
MIR173	+	576	TGATTTAATGTTAGAGATCTT	21	1	426
MIR173	+	577	GATTTAATGTTAGAGATCT	19	1	37
MIR173	+	577	GATTTAATGTTAGAGATCTT	20	1	5642
MIR173	+	578	ATTTAATGTTAGAGATCTT	19	1	5
MIR173	+	579	TTTAATGTTAGAGATCTT	18	1	5
MIR319a	+	564	AATGAATGATGCGGTAGACAAATTGGATCATTGATTCTCTTTGATTGGAC	50	1	64
MIR319a	+	581	ACAAATTGGATCATTGATTCTCTTTGATTGGACTGAAGGGAGCTCCCTCT	50	1	4
MIR319a	+	586	TTGGATCATTGATTCTCTTTGATTGGACTGAAGGGAGCTCCCTCTCTCTT	50	1	4
MIR319a	+	587	TGGATCATTGATTCTCTTTGATTGGACTGAAGGGAGCTCCCTCTCTCTTT	50	1	31
MIR319a	+	589	GATCATTGATTCTCTTTGATTGGACTGAAGGGAGCTCCCTCTCTCTTTTG	50	1	10
MIR319a	+	607	ATTGGACTGAAGGGAGCTCCCTCTCTCTT	29	1	2
MIR319a	+	608	TTGGACTGAAGGGAGCTCCCTCTCTCTT	28	1	13
MIR319a	+	609	TGGACTGAAGGGAGCTCCCTCTCTCTT	27	1	1
MIR319a	+	648	TTTCTTGATTAATCTTTCCTGCACAAAAACATGCTTG	37	1	3
MIR319a	+	652	TTGATTAATCTTTCCTGCACAAAAACATGCTTG	33	1	5
MIR319a	+	655	ATTAATCTTTCCTGCACAAAAACATGCTTG	30	1	8
MIR319a	+	656	TTAATCTTTCCTGCACAAAAACATGCTTG	29	1	5
MIR319a	+	659	ATCTTTCCTGCACAAAAACATGCTT	25	1	1
MIR319a	+	660	TCTTTCCTGCACAAAAACATGCTTG	25	1	26
MIR319a	+	661	CTTTCCTGCACAAAAACATGCTTG	24	1	187
MIR319a	+	662	TTTCCTGCACAAAAACATGCTTGA	24	1	2
MIR319a	+	662	TTTCCTGCACAAAAACATGCTTG	23	1	13851
MIR319a	+	662	TTTCCTGCACAAAAACATGCTT	22	1	46
MIR319a	+	663	TTCCTGCACAAAAACATG	18	1	1
MIR319a	+	663	TTCCTGCACAAAAACATGCTTGA	23	1	1
MIR319a	+	663	TTCCTGCACAAAAACATGCTT	21	1	35
MIR319a	+	663	TTCCTGCACAAAAACATGCTTG	22	1	12207
MIR319a	+	663	TTCCTGCACAAAAACATGC	19	1	1
MIR319a	+	664	TCCTGCACAAAAACATGCTTG	21	1	11445
MIR319a	+	664	TCCTGCACAAAAACATGCTT	20	1	17
MIR319a	+	665	CCTGCACAAAAACATGCTTG	20	1	160640
MIR319a	+	665	CCTGCACAAAAACATGCT	18	1	3
MIR319a	+	665	CCTGCACAAAAACATGCTT	19	1	203
MIR319a	+	665	CCTGCACAAAAACATGCTTGA	21	1	21
MIR319a	+	666	CTGCACAAAAACATGCTT	18	1	532
MIR319a	+	666	CTGCACAAAAACATGCTTGA	20	1	30
MIR319a	+	666	CTGCACAAAAACATGCTTG	19	1	399965
MIR319a	+	667	TGCACAAAAACATGCTTG	18	1	1460
MIR319b	+	967	AATGAATGATGCGAGAGACAAATTGAGTCTTCACTTCTCTATGCTTGGAC	50	1	35
MIR319b	+	988	ATTGAGTCTTCACTTCTCTATGCTTGGACTGAAGGGAGCTCCCTATTTTT	50	1	5
MIR319b	+	990	TGAGTCTTCACTTCTCTATGCTTGGACTGAAGGGAGCTCCCTATTTTTAT	50	1	4
MIR319b	+	1010	CTTGGACTGAAGGGAGCTCCCTATTTTTATCTTTCTCAGAGTACCACATT	50	1	2
MIR319b	+	1012	TGGACTGAAGGGAGCTCCCTATTTTTATCTTTCTCAGAGTACCACATTTT	50	1	4
MIR319b	+	1032	ATTTTTATCTTTCTCAGAGTACCACATTTTATATCTATATATATACAAGC	50	1	2
MIR319b	+	1051	TACCACATTTTATATCTATATATATACAAGC	31	1	3
MIR319b	+	1057	ATTTTATATCTATATATATACAAGC	25	1	14
MIR319b	+	1058	TTTTATATCTATATATATACAAGC	24	1	36
MIR319b	+	1059	TTTATATCTATATATATACAAGC	23	1	45
MIR319b	+	1060	TTATATCTATATATATACAAG	21	1	2
MIR319b	+	1060	TTATATCTATATATATACAAGC	22	1	393
MIR319b	+	1061	TATATCTATATATATACAAGC	21	1	28
MIR319b	+	1062	ATATCTATATATATACAAGC	20	1	6
MIR319b	+	1063	TATCTATATATATACAAGC	19	1	11
MIR319b	+	1064	ATCTATATATATACAAGC	18	1	17
MIR319c	+	843	TATTTTTGATCCTTCTTTATCTGTGTTTGGACTGAAGGGAGCTCCTTCTT	50	1	2
MIR319c	+	845	TTTTTGATCCTTCTTTATCTGTGTTTGGACTGAAGGGAGCTCCTTCTTTT	50	1	38
MIR319c	+	846	TTTTGATCCTTCTTTATCTGTGTTTGGACTGAAGGGAGCTCCTTCTTTTT	50	1	32
MIR319c	+	850	GATCCTTCTTTATCTGTGTTTGGACTGAAGGGAGCTCCTTCTTTTTCTAC	50	1	1
MIR319c	+	889	TCTTTTTCTACAAATTTTCATTTTTCTCATAATCTGTTTATATGTGATGA	50	1	36
MIR319c	+	890	CTTTTTCTACAAATTTTCATTTTTCTCATAATCTGTTTATATGTGATGAG	50	1	39
MIR319c	+	891	TTTTTCTACAAATTTTCATTTTTCTCATAATCTGTTTATATGTGATGAGT	50	1	7
MIR319c	+	917	ATAATCTGTTTATATGTGATGAGTA	25	1	8
MIR319c	+	918	TAATCTGTTTATATGTGATGAGTA	24	1	40
MIR319c	+	919	AATCTGTTTATATGTGATGAGT	22	1	3
MIR319c	+	919	AATCTGTTTATATGTGATGAGTA	23	1	433
MIR319c	+	920	ATCTGTTTATATGTGATGAGTAT	23	1	1
MIR319c	+	920	ATCTGTTTATATGTGATGAGTA	22	1	1409
MIR319c	+	920	ATCTGTTTATATGTGATGAGT	21	1	9
MIR319c	+	921	TCTGTTTATATGTGATGAGTA	21	1	1648
MIR319c	+	921	TCTGTTTATATGTGATGAGT	20	1	4
MIR319c	+	922	CTGTTTATATGTGATGAGT	19	1	78
MIR319c	+	922	CTGTTTATATGTGATGAGTAT	21	1	8
MIR319c	+	922	CTGTTTATATGTGATGAGTA	20	1	51526
MIR319c	+	923	TGTTTATATGTGATGAGTAT	20	1	27
MIR319c	+	923	TGTTTATATGTGATGAGT	18	1	282
MIR319c	+	923	TGTTTATATGTGATGAGTA	19	1	155897
MIR319c	+	924	GTTTATATGTGATGAGTA	18	1	268
MIR390a	+	729	CATCCTGAGTTTCATTGGCTCTTCTTACTACAATGAAAAAGGCCGAGGCA	50	1	12
MIR390a	+	743	TTGGCTCTTCTTACTACAATGAAAAAGGCCGAGGCAAAACGCCTAAAATC	50	1	67
MIR390a	+	768	AGGCCGAGGCAAAACGCCTAAAATC	25	1	2
MIR390a	+	770	GCCGAGGCAAAACGCCTAAAATC	23	1	3
MIR390a	+	771	CCGAGGCAAAACGCCTAAAATC	22	1	55
MIR390a	+	772	CGAGGCAAAACGCCTAAAAT	20	1	13
MIR390a	+	772	CGAGGCAAAACGCCTAAAATC	21	1	2006
MIR390a	+	773	GAGGCAAAACGCCTAAAAT	19	1	34
MIR390a	+	773	GAGGCAAAACGCCTAAAA	18	1	9
MIR390a	+	773	GAGGCAAAACGCCTAAAATC	20	1	10669
MIR390a	+	774	AGGCAAAACGCCTAAAATC	19	1	6
MIR390a	+	775	GGCAAAACGCCTAAAATC	18	1	5
MIR390a	+	1245	GGAACAGATATGCTCTGCATGAACCACGTGGACCAACATGCATATACACA	50	1	2
MIR390b	+	734	CTATCCATCCTGAGTTCCATAGCTTCTTCTTGCTTATATGTGATTCCTAC	50	1	4
MIR390b	+	744	TGAGTTCCATAGCTTCTTCTTGCTTATATGTGATTCCTACTTCATTCCCT	50	1	8
MIR390b	+	753	TAGCTTCTTCTTGCTTATATGTGATTCCTACTTCATTCCCTCCT	44	1	11
MIR390b	+	778	TCCTACTTCATTCCCTCCTTCGTTT	25	1	1
MIR390b	+	779	CCTACTTCATTCCCTCCTTCGTTT	24	1	10
MIR390b	+	780	CTACTTCATTCCCTCCTTCGTTT	23	1	72
MIR390b	+	781	TACTTCATTCCCTCCTTCGTTT	22	1	119
MIR390b	+	782	ACTTCATTCCCTCCTTCGTTT	21	1	810
MIR390b	+	782	ACTTCATTCCCTCCTTCGTT	20	1	2
MIR390b	+	783	CTTCATTCCCTCCTTCGT	18	1	10
MIR390b	+	783	CTTCATTCCCTCCTTCGTTT	20	1	33538
MIR390b	+	783	CTTCATTCCCTCCTTCGTT	19	1	192
MIR390b	+	784	TTCATTCCCTCCTTCGTT	18	1	298
MIR390b	+	784	TTCATTCCCTCCTTCGTTT	19	1	64144
MIR390b	+	785	TCATTCCCTCCTTCGTTT	18	1	203
MIR391	+	830	CAATCCTTATATATGCATCTTAATACGGAGAGATCAAGGTATTTCAGTTG	50	1	6
MIR391	+	831	AATCCTTATATATGCATCTTAATACGGAGAGATCAAGGTATTTCAGTTGT	50	1	22
MIR391	+	855	CGGAGAGATCAAGGTATTTCAGTTGT	26	1	3
MIR391	+	856	GGAGAGATCAAGGTATTTCAGTTGT	25	1	29
MIR391	+	857	GAGAGATCAAGGTATTTCAGTTGT	24	1	120
MIR391	+	858	AGAGATCAAGGTATTTCAGTTGT	23	1	3594
MIR391	+	858	AGAGATCAAGGTATTTCAGTTG	22	1	3
MIR391	+	859	GAGATCAAGGTATTTCAGTTGT	22	1	1054
MIR391	+	860	AGATCAAGGTATTTCAGTTG	20	1	32
MIR391	+	860	AGATCAAGGTATTTCAGTT	19	1	2
MIR391	+	860	AGATCAAGGTATTTCAGTTGT	21	1	14947
MIR391	+	861	GATCAAGGTATTTCAGTTG	19	1	247
MIR391	+	861	GATCAAGGTATTTCAGTTGTT	21	1	1
MIR391	+	861	GATCAAGGTATTTCAGTTGT	20	1	58025
MIR391	+	861	GATCAAGGTATTTCAGTT	18	1	2
MIR391	+	862	ATCAAGGTATTTCAGTTGT	19	1	482
MIR391	+	863	TCAAGGTATTTCAGTTGT	18	1	14
MIR391	+	864	CAAGGTATTTCAGTTGTT	18	1	19
MIR393a	+	905	TCATGCTATCTCTTTGGA	18	1	6
MIR393a	+	925	CATCCTTCGGTAGCTTCCTCTTCGATCGTATG	32	1	134
MIR393a	+	925	CATCCTTCGGTAGCTTCCTCTTCGA	25	1	10
MIR393a	+	926	ATCCTTCGGTAGCTTCCTCTTCGA	24	1	1
MIR393a	+	926	ATCCTTCGGTAGCTTCCTCTTCGATCGTATG	31	1	6
MIR393a	+	933	GGTAGCTTCCTCTTCGATCGTATG	24	1	2
MIR393a	+	935	TAGCTTCCTCTTCGATCGTATG	22	1	159
MIR393a	+	935	TAGCTTCCTCTTCGATCGTAT	21	1	3
MIR393a	+	936	AGCTTCCTCTTCGATCGTATG	21	1	655
MIR393a	+	937	GCTTCCTCTTCGATCGTA	18	1	4
MIR393a	+	937	GCTTCCTCTTCGATCGTAT	19	1	4
MIR393a	+	937	GCTTCCTCTTCGATCGTATG	20	1	7101
MIR393a	+	938	CTTCCTCTTCGATCGTATG	19	1	215
MIR393a	+	939	TTCCTCTTCGATCGTATG	18	1	2270
MIR393b	-	213	GAGAGAGAGAGAGAGAGAG	19	2
MIR393b	-	213	GAGAGAGAGAGAGAGAGAGAG	21	1
MIR393b	-	215	GAGAGAGAGAGAGAGAGAG	19	2
MIR393b	+	1397	CATTCTTTGGTAGCTTCCACTCCGGTCAAAGGGTTTCATGACCGGAGACA	50	1	17
MIR393b	+	1422	TCAAAGGGTTTCATGACCGGAGACA	25	1	3
MIR393b	+	1423	CAAAGGGTTTCATGACCGGAGACA	24	1	38
MIR393b	+	1424	AAAGGGTTTCATGACCGGAGACA	23	1	403
MIR393b	+	1425	AAGGGTTTCATGACCGGAGACA	22	1	1356
MIR393b	+	1426	AGGGTTTCATGACCGGAGAC	20	1	4
MIR393b	+	1426	AGGGTTTCATGACCGGAGACA	21	1	5661
MIR393b	+	1427	GGGTTTCATGACCGGAGAC	19	1	17
MIR393b	+	1427	GGGTTTCATGACCGGAGACAT	21	1	2
MIR393b	+	1427	GGGTTTCATGACCGGAGACA	20	1	8775
MIR393b	+	1428	GGTTTCATGACCGGAGACA	19	1	161
MIR393b	+	1429	GTTTCATGACCGGAGACA	18	1	137
MIR394a	+	238	TGATAAATATATCAAGAA	18	1	1
MIR394a	+	1212	CTTCTTCGTAAAACCCTCTTGATCTATATACAAGT	35	1	5
MIR394a	+	1215	CTTCGTAAAACCCTCTTGATCTATATACAAGT	32	1	1
MIR394a	+	1221	AAAACCCTCTTGATCTATATACAAGT	26	1	5
MIR394a	+	1222	AAACCCTCTTGATCTATATACAAGT	25	1	6
MIR394a	+	1223	AACCCTCTTGATCTATATACAAGT	24	1	1
MIR394a	+	1224	ACCCTCTTGATCTATATACAAGT	23	1	36
MIR394a	+	1225	CCCTCTTGATCTATATACAAG	21	1	3
MIR394a	+	1225	CCCTCTTGATCTATATAC	18	1	2
MIR394a	+	1225	CCCTCTTGATCTATATACAAGT	22	1	187
MIR394a	+	1226	CCTCTTGATCTATATACAAGT	21	1	565
MIR394a	+	1226	CCTCTTGATCTATATACAAG	20	1	1
MIR394a	+	1227	CTCTTGATCTATATACAAGTT	21	1	3
MIR394a	+	1227	CTCTTGATCTATATACAAGT	20	1	4868
MIR394a	+	1227	CTCTTGATCTATATACAAG	19	1	57
MIR394a	+	1228	TCTTGATCTATATACAAGT	19	1	8673
MIR394a	+	1228	TCTTGATCTATATACAAG	18	1	65
MIR394a	+	1229	CTTGATCTATATACAAGT	18	1	134
MIR394b	+	1098	CAATCTCATAAATATTCTCACCGTTCGCTTCTCTCATCTAAATGTTCTCT	50	1	1
MIR394b	+	1157	CTCTCTCTCTCTCTATCT	18	2	2
MIR394b	+	1302	GAGTCTCTTACAGAGATCTTTGGCATTCTGTCCACCTCCTCTCTCTATAT	50	1	7
MIR394b	+	1400	TGGGCATACTGCCAATAGAGATCTGTTAGGGTTTCTTTGTAAAACCCCTC	50	1	7
MIR394b	+	1436	TTGTAAAACCCCTCATGATTTGATATATAA	30	1	6
MIR394b	+	1439	TAAAACCCCTCATGATTTGATATATAA	27	1	25
MIR394b	+	1440	AAAACCCCTCATGATTTGATATATAA	26	1	1
MIR394b	+	1441	AAACCCCTCATGATTTGATATATAA	25	1	57
MIR394b	+	1442	AACCCCTCATGATTTGATATATAA	24	1	129
MIR394b	+	1443	ACCCCTCATGATTTGATATATAA	23	1	167
MIR394b	+	1444	CCCCTCATGATTTGATATATAA	22	1	396
MIR394b	+	1444	CCCCTCATGATTTGATATATA	21	1	5
MIR394b	+	1445	CCCTCATGATTTGATATATA	20	1	43
MIR394b	+	1445	CCCTCATGATTTGATATAT	19	1	1
MIR394b	+	1445	CCCTCATGATTTGATATATAA	21	1	7638
MIR394b	+	1446	CCTCATGATTTGATATATA	19	1	218
MIR394b	+	1446	CCTCATGATTTGATATATAA	20	1	58819
MIR394b	+	1446	CCTCATGATTTGATATAT	18	1	4
MIR394b	+	1447	CTCATGATTTGATATATAAA	20	1	6
MIR394b	+	1447	CTCATGATTTGATATATAA	19	1	358913
MIR394b	+	1447	CTCATGATTTGATATATA	18	1	1249
MIR394b	+	1448	TCATGATTTGATATATAA	18	1	1270
MIR395a	+	1024	CGAGACGAGATTTTATATGGTAA	23	1	11
MIR395a	+	1025	GAGACGAGATTTTATATGGTA	21	1	3
MIR395a	+	1025	GAGACGAGATTTTATATGGTAA	22	1	175
MIR395a	+	1026	AGACGAGATTTTATATGGTAA	21	1	273
MIR395a	+	1027	GACGAGATTTTATATGGTA	19	1	8
MIR395a	+	1027	GACGAGATTTTATATGGTAA	20	1	1183
MIR395a	+	1028	ACGAGATTTTATATGGTAA	19	1	8
MIR395a	+	1029	CGAGATTTTATATGGTAA	18	1	95
MIR395a	+	1030	GAGATTTTATATGGTAAA	18	1	1
MIR395b	+	1086	CCATTGCAGCCGTTTTATGGGTTCTT	26	1	1
MIR395b	+	1087	CATTGCAGCCGTTTTATGGGTTCTT	25	1	1
MIR395b	+	1088	ATTGCAGCCGTTTTATGGGTTCTT	24	1	3
MIR395b	+	1089	TTGCAGCCGTTTTATGGGTTCTT	23	1	17
MIR395b	+	1089	TTGCAGCCGTTTTATGGGTTCT	22	1	1
MIR395b	+	1090	TGCAGCCGTTTTATGGGTTCTT	22	1	21
MIR395b	+	1091	GCAGCCGTTTTATGGGTTCT	20	1	2
MIR395b	+	1091	GCAGCCGTTTTATGGGTTCTT	21	1	607
MIR395b	+	1092	CAGCCGTTTTATGGGTTCTT	20	1	6961
MIR395b	+	1092	CAGCCGTTTTATGGGTTC	18	1	1
MIR395b	+	1092	CAGCCGTTTTATGGGTTCT	19	1	30
MIR395b	+	1093	AGCCGTTTTATGGGTTCT	18	1	122
MIR395b	+	1093	AGCCGTTTTATGGGTTCTTT	20	1	4
MIR395b	+	1093	AGCCGTTTTATGGGTTCTT	19	1	24929
MIR395b	+	1094	GCCGTTTTATGGGTTCTT	18	1	437
MIR395c	+	1300	ATTGCTGCGGTTTTCTATTATCT	23	1	10
MIR395c	+	1301	TTGCTGCGGTTTTCTATTATCT	22	1	18
MIR395c	+	1302	TGCTGCGGTTTTCTATTATCT	21	1	24
MIR395c	+	1303	GCTGCGGTTTTCTATTATCTT	21	1	2
MIR395c	+	1303	GCTGCGGTTTTCTATTATC	19	1	7
MIR395c	+	1303	GCTGCGGTTTTCTATTATCT	20	1	451
MIR395c	+	1304	CTGCGGTTTTCTATTATCT	19	1	12
MIR395c	+	1305	TGCGGTTTTCTATTATCTT	19	1	1
MIR395c	+	1305	TGCGGTTTTCTATTATCT	18	1	280
MIR395c	+	1983	AACTATAAAAAATCGACCAA	20	1	1
MIR395d	+	1541	ATGTAAAATGGTAACTTTATAC	22	2	6
MIR395d	+	1542	TGTAAAATGGTAACTTTATAC	21	2	93
MIR395d	+	1542	TGTAAAATGGTAACTTTATA	20	2	1
MIR395d	+	1543	GTAAAATGGTAACTTTATA	19	2	3
MIR395d	+	1543	GTAAAATGGTAACTTTATAC	20	2	403
MIR395d	+	1543	GTAAAATGGTAACTTTATACT	21	2	1
MIR395d	+	1544	TAAAATGGTAACTTTATAC	19	2	3
MIR395d	+	1545	AAAATGGTAACTTTATAC	18	2	1
MIR395e	+	1542	ATGTAAAATGGTAACTTTATAC	22	2	6
MIR395e	+	1543	TGTAAAATGGTAACTTTATAC	21	2	93
MIR395e	+	1543	TGTAAAATGGTAACTTTATA	20	2	1
MIR395e	+	1544	GTAAAATGGTAACTTTATA	19	2	3
MIR395e	+	1544	GTAAAATGGTAACTTTATAC	20	2	403
MIR395e	+	1544	GTAAAATGGTAACTTTATACT	21	2	1
MIR395e	+	1545	TAAAATGGTAACTTTATAC	19	2	3
MIR395e	+	1546	AAAATGGTAACTTTATAC	18	2	1
MIR396a	+	1549	GTTCAATAAAGCTGTGGGAAGATACAGACAGAGTCAAATGATTTTCTAAA	50	1	1
MIR396a	+	1570	ATACAGACAGAGTCAAATGATTTTCTAAATTTCGTTCATATATATGAAAG	50	1	5
MIR396a	+	1600	TTCGTTCATATATATGAAAGCG	22	1	3
MIR396a	+	1601	TCGTTCATATATATGAAAGCG	21	1	1
MIR396a	+	1602	CGTTCATATATATGAAAGC	19	1	1
MIR396a	+	1602	CGTTCATATATATGAAAGCG	20	1	20
MIR396a	+	1603	GTTCATATATATGAAAGCG	19	1	110
MIR396a	+	2195	TTTGTAATGCTTTCATATTATTTATTTTTGAGATAATGATTTATTGGTGG	50	1	9
MIR396b	+	1409	AAGCTGTGGGAAAACATGACAATTCAGGGTTTTACTCCATTGATTCACTT	50	1	1
MIR396b	+	1422	ACATGACAATTCAGGGTTTTACTCCATTGATTCACTTGTCAAGATTCTTC	50	1	2
MIR396b	+	1450	GATTCACTTGTCAAGATTCTTCTT	24	1	1
MIR396b	+	1451	ATTCACTTGTCAAGATTCTTCT	22	1	1
MIR396b	+	1451	ATTCACTTGTCAAGATTCTTCTT	23	1	2
MIR396b	+	1452	TTCACTTGTCAAGATTCTTCTT	22	1	18
MIR396b	+	1452	TTCACTTGTCAAGATTCTTCT	21	1	1
MIR396b	+	1453	TCACTTGTCAAGATTCTTCTT	21	1	37
MIR396b	+	1453	TCACTTGTCAAGATTCTTCT	20	1	1
MIR396b	+	1454	CACTTGTCAAGATTCTTC	18	1	1
MIR396b	+	1454	CACTTGTCAAGATTCTTCT	19	1	36
MIR396b	+	1454	CACTTGTCAAGATTCTTCTT	20	1	839
MIR396b	+	1455	ACTTGTCAAGATTCTTCTTT	20	1	1
MIR396b	+	1455	ACTTGTCAAGATTCTTCTT	19	1	3006
MIR396b	+	1455	ACTTGTCAAGATTCTTCT	18	1	122
MIR396b	+	1456	CTTGTCAAGATTCTTCTT	18	1	29
MIR397a	+	932	GTTGCGCTCAATTATGTTTTTCTAATTTTCAGGAACACTTAAACAGGTAT	50	1	1
MIR397a	+	940	CAATTATGTTTTTCTAATTTTCAGGAACACTTAAACAGGTATGCGGATCG	50	1	1
MIR397a	+	948	TTTTTCTAATTTTCAGGAACACTTAAACAGGTATGCGGATCGTTTTTTAT	50	1	1
MIR397a	+	972	AAACAGGTATGCGGATCGTTTTTTA	25	1	3
MIR397a	+	973	AACAGGTATGCGGATCGTTTTTTA	24	1	1
MIR397a	+	974	ACAGGTATGCGGATCGTTTTTTA	23	1	4
MIR397a	+	975	CAGGTATGCGGATCGTTTTTTA	22	1	3
MIR397a	+	976	AGGTATGCGGATCGTTTTTTA	21	1	40
MIR397a	+	977	GGTATGCGGATCGTTTTTT	19	1	3
MIR397a	+	977	GGTATGCGGATCGTTTTTTA	20	1	109
MIR397a	+	978	GTATGCGGATCGTTTTTTA	19	1	18
MIR397a	+	979	TATGCGGATCGTTTTTTA	18	1	1
MIR397a	-	1051	TATTATTTAGGGCTCAAACG	20	1
MIR398a	+	811	TGTGTTCTCAGGTCACCCC	19	3	264
MIR398a	+	812	GTGTTCTCAGGTCACCCC	18	3	7
MIR398a	+	875	ATTCATACTCTAAATTTGTGAGC	23	1	3
MIR398a	+	876	TTCATACTCTAAATTTGTGAGC	22	1	2
MIR398a	+	877	TCATACTCTAAATTTGTGAGC	21	1	5
MIR398a	+	878	CATACTCTAAATTTGTGAGCT	21	1	3
MIR398a	+	878	CATACTCTAAATTTGTGAGC	20	1	227
MIR398a	+	878	CATACTCTAAATTTGTGAG	19	1	4
MIR398a	+	879	ATACTCTAAATTTGTGAG	18	1	16
MIR398a	+	879	ATACTCTAAATTTGTGAGC	19	1	553
MIR398a	+	880	TACTCTAAATTTGTGAGC	18	1	17
MIR398b	-	243	TAGTACAAAACTCGCCGTTGTACTTTCAGAAAAGTACAATGATGATGATT	50	1
MIR398b	+	578	TACGTCATTGTTACAGCTCTCGTTTTCATGTGTTCTCAGGTCACCCCTGC	50	1	1
MIR398b	+	606	TGTGTTCTCAGGTCACCCC	19	3	264
MIR398b	+	607	GTGTTCTCAGGTCACCCC	18	3	7
MIR398b	+	627	CTGAGCTCTTTCTCTACCGTCCATCTTTTATCAAGGCTGGCT	42	1	1
MIR398b	+	627	CTGAGCTCTTTCTCTACCGTCCATCTTTTATCAAGGCTGGCTTTTACTCA	50	1	108
MIR398b	+	628	TGAGCTCTTTCTCTACCGTCCATCTTTTATCAAGGCTGGCTTTTACTCAT	50	1	6
MIR398b	+	633	TCTTTCTCTACCGTCCATCTTTTATCAAGGCTGGCTTTTACTCAT	45	1	1
MIR398b	+	634	CTTTCTCTACCGTCCATCTTTTATCAAGGCTGGCTTTTACTCA	43	1	2
MIR398b	+	642	ACCGTCCATCTTTTATCAAGGCTGGCTTTTACTCAT	36	1	1
MIR398b	+	642	ACCGTCCATCTTTTATCAAGGCTGGCTTTTACTCA	35	1	1
MIR398b	+	644	CGTCCATCTTTTATCAAGGCTGGCTTTTACTCAT	34	1	1
MIR398b	+	647	CCATCTTTTATCAAGGCTGGCTTTTACTCAT	31	1	2
MIR398b	+	652	TTTTATCAAGGCTGGCTTTTACTCAT	26	1	1
MIR398b	+	653	TTTATCAAGGCTGGCTTTTACTCAT	25	1	1
MIR398b	+	654	TTATCAAGGCTGGCTTTTACTCAT	24	1	2
MIR398b	+	655	TATCAAGGCTGGCTTTTACTCA	22	1	1
MIR398b	+	655	TATCAAGGCTGGCTTTTACTCAT	23	1	1
MIR398b	+	656	ATCAAGGCTGGCTTTTACTCAT	22	1	34
MIR398b	+	657	TCAAGGCTGGCTTTTACTCAT	21	1	87
MIR398b	+	657	TCAAGGCTGGCTTTTACTCA	20	1	1
MIR398b	+	658	CAAGGCTGGCTTTTACTCA	19	1	61
MIR398b	+	658	CAAGGCTGGCTTTTACTCAT	20	1	2310
MIR398b	+	658	CAAGGCTGGCTTTTACTC	18	1	4
MIR398b	+	658	CAAGGCTGGCTTTTACTCATT	21	1	1
MIR398b	+	659	AAGGCTGGCTTTTACTCAT	19	1	5343
MIR398b	+	659	AAGGCTGGCTTTTACTCA	18	1	96
MIR398b	+	659	AAGGCTGGCTTTTACTCATT	20	1	5
MIR398b	+	660	AGGCTGGCTTTTACTCAT	18	1	36
MIR398c	+	690	TGTGTTCTCAGGTCACCCC	19	3	264
MIR398c	+	691	GTGTTCTCAGGTCACCCC	18	3	7
MIR398c	+	711	CTGAGCTCTTTCTCTACCGTCCATGTTTTATCAACGCCGTGGCCCGTGGC	50	1	7
MIR398c	+	712	TGAGCTCTTTCTCTACCGTCCATGTTTTATCAACGCCGTGGCCCGTGGCT	50	1	1
MIR398c	+	738	TTATCAACGCCGTGGCCCGTGGCT	24	1	1
MIR398c	+	740	ATCAACGCCGTGGCCCGTGGCT	22	1	5
MIR398c	+	741	TCAACGCCGTGGCCCGTGGCT	21	1	28
MIR398c	+	742	CAACGCCGTGGCCCGTGGCT	20	1	966
MIR398c	+	742	CAACGCCGTGGCCCGTGGC	19	1	3
MIR398c	+	742	CAACGCCGTGGCCCGTGGCTT	21	1	1
MIR398c	+	742	CAACGCCGTGGCCCGTGG	18	1	1
MIR398c	+	743	AACGCCGTGGCCCGTGGCTT	20	1	1
MIR398c	+	743	AACGCCGTGGCCCGTGGC	18	1	11
MIR398c	+	743	AACGCCGTGGCCCGTGGCT	19	1	2794
MIR398c	+	744	ACGCCGTGGCCCGTGGCT	18	1	12
MIR398c	+	746	GCCGTGGCCCGTGGCTTCT	19	1	3
MIR398c	-	957	ACAATGAGCTCATCAACACGATTGTGATTTGTCAGAGTCACTTTGCCTAT	50	1
MIR398c	-	1293	CGTCTTCTACAAGGAGTCCCCGAGAAATATCTTCTTCTTCGGAAGATGAC	50	1
MIR398c	+	1524	CCACCACTCCTAACGATCTGTCATTATAAACAAAACCAAATTAAAACCAA	50	1	1
MIR398c	+	1565	TAAAACCAAACCGAAATTATTAGCAAAAACCGGATTGGTAGACTTTAAAC	50	1	3
MIR398c	+	1723	TCGTCCGAGTAACACGCACAACAACCCAGCCACCGATTGCACGATCCATA	50	1	7
MIR398c	+	1732	TAACACGCACAACAACCCAGCCACCGATTGCACGATCCATAGCCCCCACA	50	1	1
MIR398c	+	2115	TGTTACCGTGGGGAGTATCTTGGCCGTAGAGGAGAACGAGGACGGCCGTT	50	1	1
MIR398c	-	2136	GGCCGTAGAGGAGAACGAGGACGGCCGTTGTAACCTGAAAAATGGCGGGA	50	1
MIR398c	+	2175	AAATGGCGGGAAATACGAAGGACACGCGCCAGGCGACGGCGCGTGGAAGG	50	1	3
MIR398c	+	2506	ACAGAGTGGTCCCATAGCGAGGCGAGAGAAGATGGAGCCAGCGAAGGAAG	50	1	4
MIR398c	+	2558	ATTCCGGCGGCGGATACGGTGGAGGCAGAGAGGTTGAGGTCGGAGGAGAT	50	1	2
MIR398c	+	2571	ATACGGTGGAGGCAGAGAGGTTGAGGTCGGAGGAGATGACGGGGACCAGA	50	1	7
MIR398c	-	2589	GGTTGAGGTCGGAGGAGATGACGGGGACCAGAGGAGGGATGGAGAAGGTG	50	1
MIR398c	+	2590	GTTGAGGTCGGAGGAGATGACGGGGACCAGAGGAGGGATGGAGAAGGTGG	50	1	3
MIR398c	-	2611	GGGGACCAGAGGAGGGATGGAGAAGGTGGAGAAGAAGCATGAGAAGAGTG	50	1
MIR398c	-	2626	GATGGAGAAGGTGGAGAAGAAGCATGAGAAGAGTGAGAGCCAAGCTAGGT	50	1
MIR398c	+	2629	GGAGAAGGTGGAGAAGAAGCATGAGAAGAGTGAGAGCCAAGCTAGGTGAA	50	1	5
MIR399a	+	885	TAATTCTTCTGCACCAACATATTAATATGATTAATCACAAAAGAATAAAA	50	1	1
MIR399a	+	914	ATTAATCACAAAAGAATAAAACTAAA	26	1	2
MIR399a	+	915	TTAATCACAAAAGAATAAAACTAAA	25	1	1
MIR399a	+	916	TAATCACAAAAGAATAAAACTAAA	24	1	7
MIR399a	+	917	AATCACAAAAGAATAAAACTAAA	23	1	22
MIR399a	+	918	ATCACAAAAGAATAAAACTAA	21	1	2
MIR399a	+	918	ATCACAAAAGAATAAAACTAAA	22	1	107
MIR399a	+	919	TCACAAAAGAATAAAACTAAA	21	1	69
MIR399a	+	919	TCACAAAAGAATAAAACTAA	20	1	1
MIR399a	+	920	CACAAAAGAATAAAACTAA	19	1	21
MIR399a	+	920	CACAAAAGAATAAAACTA	18	1	2
MIR399a	+	920	CACAAAAGAATAAAACTAAAC	21	1	1
MIR399a	+	920	CACAAAAGAATAAAACTAAA	20	1	2004
MIR399a	+	921	ACAAAAGAATAAAACTAA	18	1	76
MIR399a	+	921	ACAAAAGAATAAAACTAAA	19	1	6360
MIR399a	+	921	ACAAAAGAATAAAACTAAAC	20	1	1
MIR399a	+	922	CAAAAGAATAAAACTAAA	18	1	80
MIR399b	+	775	ATTTTACCTTTTTGTAAC	18	1	1
MIR399b	+	1312	TGAAACTGGTTCAGCTTAATTAAACACATGAAAGAGAGAAGAAATCAAAG	50	1	5
MIR399b	+	1324	AGCTTAATTAAACACATGAAAGAGAGAAGAAATCAAAGGTA	41	1	2
MIR399b	+	1339	ATGAAAGAGAGAAGAAATCAAAGGTA	26	1	12
MIR399b	+	1339	ATGAAAGAGAGAAGAAATCAAAGGT	25	1	1
MIR399b	+	1340	TGAAAGAGAGAAGAAATCAAAGGTA	25	1	40
MIR399b	+	1341	GAAAGAGAGAAGAAATCAAAGGTA	24	1	154
MIR399b	+	1341	GAAAGAGAGAAGAAATCAAAGGT	23	1	3
MIR399b	+	1342	AAAGAGAGAAGAAATCAAAGGTA	23	1	727
MIR399b	+	1342	AAAGAGAGAAGAAATCAAAGGT	22	1	15
MIR399b	+	1343	AAGAGAGAAGAAATCAAAGG	20	1	2
MIR399b	+	1343	AAGAGAGAAGAAATCAAAGGT	21	1	12
MIR399b	+	1343	AAGAGAGAAGAAATCAAAGGTA	22	1	1157
MIR399b	+	1344	AGAGAGAAGAAATCAAAGG	19	1	6
MIR399b	+	1344	AGAGAGAAGAAATCAAAGGTA	21	1	3038
MIR399b	+	1344	AGAGAGAAGAAATCAAAGGT	20	1	44
MIR399b	+	1344	AGAGAGAAGAAATCAAAG	18	1	1
MIR399b	+	1345	GAGAGAAGAAATCAAAGGT	19	1	48
MIR399b	+	1345	GAGAGAAGAAATCAAAGGTA	20	1	4483
MIR399b	+	1345	GAGAGAAGAAATCAAAGG	18	1	4
MIR399b	+	1346	AGAGAAGAAATCAAAGGTA	19	1	24
MIR399b	+	1347	GAGAAGAAATCAAAGGTA	18	1	7
MIR399c	+	1013	TATAACCGGTTCTGCTAATATCAATC	26	1	1
MIR399c	+	1014	ATAACCGGTTCTGCTAATATCAATC	25	1	1
MIR399c	+	1015	TAACCGGTTCTGCTAATATCAATC	24	1	1
MIR399c	+	1016	AACCGGTTCTGCTAATATCAATC	23	1	5
MIR399c	+	1017	ACCGGTTCTGCTAATATCAATCC	23	1	1
MIR399c	+	1017	ACCGGTTCTGCTAATATCAATC	22	1	46
MIR399c	+	1018	CCGGTTCTGCTAATATCAATC	21	1	120
MIR399c	+	1018	CCGGTTCTGCTAATATCAATCC	22	1	1
MIR399c	+	1018	CCGGTTCTGCTAATATCAAT	20	1	1
MIR399c	+	1018	CCGGTTCTGCTAATATCAA	19	1	1
MIR399c	+	1019	CGGTTCTGCTAATATCAATCC	21	1	8
MIR399c	+	1019	CGGTTCTGCTAATATCAAT	19	1	11
MIR399c	+	1019	CGGTTCTGCTAATATCAA	18	1	1
MIR399c	+	1019	CGGTTCTGCTAATATCAATC	20	1	1038
MIR399c	+	1020	GGTTCTGCTAATATCAAT	18	1	398
MIR399c	+	1020	GGTTCTGCTAATATCAATC	19	1	47049
MIR399c	+	1020	GGTTCTGCTAATATCAATCCT	21	1	7
MIR399c	+	1020	GGTTCTGCTAATATCAATCC	20	1	386
MIR399c	+	1021	GTTCTGCTAATATCAATC	18	1	19
MIR399d	+	541	TTTCTTTATAGTCTCTAGGCAAT	23	1	2
MIR399d	+	542	TTCTTTATAGTCTCTAGGCAAT	22	1	3
MIR399d	+	543	TCTTTATAGTCTCTAGGCAAT	21	1	4
MIR399d	+	544	CTTTATAGTCTCTAGGCAATT	21	1	10
MIR399d	+	544	CTTTATAGTCTCTAGGCAA	19	1	4
MIR399d	+	544	CTTTATAGTCTCTAGGCAAT	20	1	219
MIR399d	+	545	TTTATAGTCTCTAGGCAA	18	1	1
MIR399d	+	545	TTTATAGTCTCTAGGCAATT	20	1	11
MIR399d	+	545	TTTATAGTCTCTAGGCAAT	19	1	356
MIR399d	+	546	TTATAGTCTCTAGGCAAT	18	1	10
MIR399d	+	546	TTATAGTCTCTAGGCAATT	19	1	1
MIR399d	+	547	TATAGTCTCTAGGCAATT	18	1	1
MIR399f	+	549	ATTCATTTCTCCAATATCCAAATCTAG	27	1	1
MIR399f	+	552	CATTTCTCCAATATCCAAATCTAGT	25	1	2
MIR399f	+	553	ATTTCTCCAATATCCAAATCTAGT	24	1	11
MIR399f	+	554	TTTCTCCAATATCCAAATCTAGT	23	1	52
MIR399f	+	554	TTTCTCCAATATCCAAATCTAG	22	1	11
MIR399f	+	554	TTTCTCCAATATCCAAATCTA	21	1	5
MIR399f	+	555	TTCTCCAATATCCAAATCTAG	21	1	27
MIR399f	+	555	TTCTCCAATATCCAAATCTA	20	1	4
MIR399f	+	555	TTCTCCAATATCCAAATCTAGT	22	1	186
MIR399f	+	556	TCTCCAATATCCAAATCTAGT	21	1	282
MIR399f	+	556	TCTCCAATATCCAAATCTAG	20	1	65
MIR399f	+	556	TCTCCAATATCCAAATCTA	19	1	6
MIR399f	+	556	TCTCCAATATCCAAATCT	18	1	2
MIR399f	+	557	CTCCAATATCCAAATCTAGT	20	1	4469
MIR399f	+	557	CTCCAATATCCAAATCTAG	19	1	968
MIR399f	+	557	CTCCAATATCCAAATCTA	18	1	191
MIR399f	+	558	TCCAATATCCAAATCTAGT	19	1	9922
MIR399f	+	558	TCCAATATCCAAATCTAG	18	1	2027
MIR399f	+	559	CCAATATCCAAATCTAGT	18	1	89
MIR399f	+	2055	TTTGTTGGTTTTTGGTTAGTAAG	23	1	2
MIR399f	+	2056	TTGTTGGTTTTTGGTTAGTAAG	22	1	37
MIR399f	+	2056	TTGTTGGTTTTTGGTTAGTAA	21	1	1
MIR399f	+	2057	TGTTGGTTTTTGGTTAGTAAG	21	1	45
MIR399f	+	2057	TGTTGGTTTTTGGTTAGTAA	20	1	1
MIR399f	+	2058	GTTGGTTTTTGGTTAGTAAG	20	1	3489
MIR399f	+	2058	GTTGGTTTTTGGTTAGTA	18	1	4
MIR399f	+	2058	GTTGGTTTTTGGTTAGTAA	19	1	47
MIR399f	+	2059	TTGGTTTTTGGTTAGTAAG	19	1	4
MIR399f	+	2060	TGGTTTTTGGTTAGTAAG	18	1	4
MIR400	+	505	GACTTATGATAATCTCATGAATGGATTTTGCAACTCTTAAAGAGAGCATA	50	1	1
MIR400	+	506	ACTTATGATAATCTCATGAATGGATTTTGCAACTCTTAAAGAGAGCATAG	50	1	1
MIR400	+	553	TAGTTCTTGTGGTGCGGCTTCT	22	1	5
MIR400	+	554	AGTTCTTGTGGTGCGGCTTC	20	1	3
MIR400	+	554	AGTTCTTGTGGTGCGGCTTCT	21	1	224
MIR400	+	555	GTTCTTGTGGTGCGGCTTCT	20	1	405
MIR400	+	555	GTTCTTGTGGTGCGGCTT	18	1	1
MIR400	+	555	GTTCTTGTGGTGCGGCTTC	19	1	1
MIR401	+	992	TCTTAGTTTCCTTTTCCTTAGTTTTTGCT	29	1	1
MIR401	+	995	TAGTTTCCTTTTCCTTAGTTTTTGCT	26	1	1
MIR401	+	996	AGTTTCCTTTTCCTTAGTTTTTGCT	25	1	1
MIR401	+	997	GTTTCCTTTTCCTTAGTTTTTGCT	24	1	6
MIR401	+	998	TTTCCTTTTCCTTAGTTTTTGC	22	1	3
MIR401	+	998	TTTCCTTTTCCTTAGTTTTTGCT	23	1	130
MIR401	+	999	TTCCTTTTCCTTAGTTTTTGC	21	1	4
MIR401	+	999	TTCCTTTTCCTTAGTTTTTGCT	22	1	127
MIR401	+	1000	TCCTTTTCCTTAGTTTTTGC	20	1	1
MIR401	+	1000	TCCTTTTCCTTAGTTTTTGCT	21	1	162
MIR401	+	1001	CCTTTTCCTTAGTTTTTGC	19	1	62
MIR401	+	1001	CCTTTTCCTTAGTTTTTG	18	1	3
MIR401	+	1001	CCTTTTCCTTAGTTTTTGCTC	21	1	1
MIR401	+	1001	CCTTTTCCTTAGTTTTTGCT	20	1	4003
MIR401	+	1002	CTTTTCCTTAGTTTTTGC	18	1	2262
MIR401	+	1002	CTTTTCCTTAGTTTTTGCT	19	1	145888
MIR401	+	1003	TTTTCCTTAGTTTTTGCT	18	1	421
MIR401	+	1014	TTTTGCTCCAAAATGTCTCC	20	1	6
MIR402	+	561	TTAGTTTTTGATAGAAAAAATGAGGTGGGAAGAAATTAAGACTGACTTCG	50	1	2
MIR402	+	658	GAGTCTGCTACTATGCTACTGAAAACTTTATCAAAGAAAA	40	1	1
MIR402	+	670	ATGCTACTGAAAACTTTATCAAAGAAAA	28	1	55
MIR402	+	670	ATGCTACTGAAAACTTTATCAAAGAAA	27	1	2
MIR402	+	675	ACTGAAAACTTTATCAAAGAAAA	23	1	7
MIR402	+	676	CTGAAAACTTTATCAAAGAAAA	22	1	26
MIR402	+	677	TGAAAACTTTATCAAAGAAAA	21	1	262
MIR402	+	677	TGAAAACTTTATCAAAGAAA	20	1	23
MIR402	+	678	GAAAACTTTATCAAAGAA	18	1	2
MIR402	+	678	GAAAACTTTATCAAAGAAA	19	1	40
MIR402	+	678	GAAAACTTTATCAAAGAAAA	20	1	1496
MIR402	+	679	AAAACTTTATCAAAGAAAA	19	1	31
MIR402	+	679	AAAACTTTATCAAAGAAA	18	1	6
MIR402	+	680	AAACTTTATCAAAGAAAA	18	1	9
MIR403	+	1853	TTAGATTCACGCACAAAC	18	1	19
MIR403	+	1874	TAATCTGTCTTTTCGATTTTTACCAGATCTGTCTTCGATTTCGAATCGAT	50	1	2
MIR403	+	1905	TCTTCGATTTCGAATCGATC	20	1	2
MIR403	+	1906	CTTCGATTTCGAATCGATCT	20	1	164
MIR403	+	1906	CTTCGATTTCGAATCGATC	19	1	24
MIR403	+	1906	CTTCGATTTCGAATCGAT	18	1	24
MIR403	+	1907	TTCGATTTCGAATCGATC	18	1	52
MIR403	+	1907	TTCGATTTCGAATCGATCT	19	1	364
MIR404	+	1340	TACGATAATTTTCATGTAATTCTTTTATTTAC	32	1	10
MIR404	+	1341	ACGATAATTTTCATGTAATTCTTTTATTTAC	31	1	6
MIR404	+	1342	CGATAATTTTCATGTAATTCTTTTATTTAC	30	1	9
MIR404	+	1343	GATAATTTTCATGTAATTCTTTTATTTAC	29	1	1
MIR404	+	1346	AATTTTCATGTAATTCTTTTATTTAC	26	1	1
MIR404	+	1347	ATTTTCATGTAATTCTTTTATTTAC	25	1	10
MIR404	+	1348	TTTTCATGTAATTCTTTTATTTAC	24	1	147
MIR404	+	1349	TTTCATGTAATTCTTTTATTTA	22	1	6
MIR404	+	1349	TTTCATGTAATTCTTTTATTTAC	23	1	94
MIR404	+	1350	TTCATGTAATTCTTTTATTTACT	23	1	3
MIR404	+	1350	TTCATGTAATTCTTTTATTTAC	22	1	148
MIR404	+	1351	TCATGTAATTCTTTTATTTAC	21	1	191
MIR404	+	1351	TCATGTAATTCTTTTATTTA	20	1	4
MIR404	+	1352	CATGTAATTCTTTTATTTA	19	1	334
MIR404	+	1352	CATGTAATTCTTTTATTTACT	21	1	121
MIR404	+	1352	CATGTAATTCTTTTATTT	18	1	24
MIR404	+	1352	CATGTAATTCTTTTATTTAC	20	1	17374
MIR404	+	1353	ATGTAATTCTTTTATTTACT	20	1	282
MIR404	+	1353	ATGTAATTCTTTTATTTA	18	1	581
MIR404	+	1353	ATGTAATTCTTTTATTTAC	19	1	27555
MIR404	+	1354	TGTAATTCTTTTATTTAC	18	1	16
MIR405a	-	1193	ATGGGTAACCCAACCCAACCCAACTCATAAT	31	1
MIR405a	-	1193	ATGGGTAACCCAACCCAACCCAAC	24	1
MIR405a	-	1193	ATGGGTAACCCAACCCAACCCAACTCATAA	30	1
MIR405a	-	1193	ATGGGTAACCCAACCCAACCC	21	1
MIR405a	-	1193	ATGGGTAACCCAACCCAACCCAACTCAT	28	1
MIR405a	-	1193	ATGGGTAACCCAACCCAACCCA	22	1
MIR405a	-	1193	ATGGGTAACCCAACCCAACCCAA	23	1
MIR405a	-	1193	ATGGGTAACCCAACCCAACCCAACT	25	1
MIR405a	-	1193	ATGGGTAACCCAACCCAACCCAACTCA	27	1
MIR405a	-	1193	ATGGGTAACCCAACCCAACCCAACTC	26	1
MIR405a	-	1194	TGGGTAACCCAACCCAACCCAACTCA	26	1
MIR405a	-	1194	TGGGTAACCCAACCCAACCCAAC	23	1
MIR405a	-	1194	TGGGTAACCCAACCCAACCCAACTCATAA	29	1
MIR405a	-	1194	TGGGTAACCCAACCCAACCCAACT	24	1
MIR405a	-	1194	TGGGTAACCCAACCCAACCCAACTCATAATC	31	1
MIR405a	-	1194	TGGGTAACCCAACCCAACCCAACTCATAATCA	32	1
MIR405a	-	1194	TGGGTAACCCAACCCAACCCAACTCATAATCAAAT	35	1
MIR405a	-	1194	TGGGTAACCCAACCCAACCCAACTC	25	1
MIR405a	-	1194	TGGGTAACCCAACCCAACCCAACTCATA	28	1
MIR405a	-	1194	TGGGTAACCCAACCCAACCCA	21	1
MIR405a	-	1194	TGGGTAACCCAACCCAAC	18	1
MIR405a	-	1194	TGGGTAACCCAACCCAACCCAACTCATAATCAAATG	36	1
MIR405a	-	1194	TGGGTAACCCAACCCAACCCAACTCAT	27	1
MIR405a	-	1194	TGGGTAACCCAACCCAACCCAACTCATAAT	30	1
MIR405a	-	1194	TGGGTAACCCAACCCAACCCAA	22	1
MIR405a	-	1194	TGGGTAACCCAACCCAACCC	20	1
MIR405a	-	1194	TGGGTAACCCAACCCAACC	19	1
MIR405a	-	1195	GGGTAACCCAACCCAACCCAACTCATAAT	29	1
MIR405a	-	1195	GGGTAACCCAACCCAACCCAACTCATAATC	30	1
MIR405a	-	1195	GGGTAACCCAACCCAACCCAACTCAT	26	1
MIR405a	-	1195	GGGTAACCCAACCCAACCCAACTCATAATCAAAT	34	1
MIR405a	-	1195	GGGTAACCCAACCCAACCCAACT	23	1
MIR405a	-	1195	GGGTAACCCAACCCAACCCAA	21	1
MIR405a	-	1195	GGGTAACCCAACCCAACC	18	1
MIR405a	-	1195	GGGTAACCCAACCCAACCCAACTC	24	1
MIR405a	-	1195	GGGTAACCCAACCCAACCCAACTCATAATCA	31	1
MIR405a	-	1195	GGGTAACCCAACCCAACCCA	20	1
MIR405a	-	1195	GGGTAACCCAACCCAACCCAACTCA	25	1
MIR405a	-	1195	GGGTAACCCAACCCAACCC	19	1
MIR405a	-	1195	GGGTAACCCAACCCAACCCAAC	22	1
MIR405a	-	1196	GGTAACCCAACCCAACCCAACTCAT	25	1
MIR405a	-	1196	GGTAACCCAACCCAACCCA	19	1
MIR405a	-	1196	GGTAACCCAACCCAACCCAA	20	1
MIR405a	-	1196	GGTAACCCAACCCAACCCAAC	21	1
MIR405a	-	1196	GGTAACCCAACCCAACCC	18	1
MIR405a	-	1197	GTAACCCAACCCAACCCAACTCAT	24	1
MIR405a	+	1323	TGTTAAATGGGTTAACCATTTAAATAATA	29	1	4
MIR405a	+	1328	AATGGGTTAACCATTTAAATAATA	24	1	1
MIR405a	+	1330	TGGGTTAACCATTTAAATAATA	22	1	8
MIR405a	+	1331	GGGTTAACCATTTAAATAATA	21	1	26
MIR405a	+	1332	GGTTAACCATTTAAATAAT	19	1	7
MIR405a	+	1332	GGTTAACCATTTAAATAATAA	21	1	5
MIR405a	+	1332	GGTTAACCATTTAAATAATA	20	1	928
MIR405a	+	1333	GTTAACCATTTAAATAATA	19	1	15
MIR405a	+	1334	TTAACCATTTAAATAATA	18	1	7
MIR405a	-	2543	TTCAATTTTACAAAATTTG	19	2
MIR405a	+	2604	AACCCAACTCATTTTACTCAT	21	1	1
MIR405a	-	2699	TGGGTTGAGTTGAGTTGAGTTG	22	1
MIR405a	-	2699	TGGGTTGAGTTGAGTTGAGT	20	1
MIR405a	-	2699	TGGGTTGAGTTGAGTTGAGTT	21	1
MIR405a	+	2731	TTTGACCCATTTTGACACCCC	21	1	28
MIR405a	+	2732	TTGACCCATTTTGACACCCC	20	1	2
MIR405a	+	2733	TGACCCATTTTGACACCCC	19	1	1
MIR405b	-	187	TTATTATTTAAATGGTTAACC	21	2
MIR405b	-	188	TATTATTTAAATGGTTAACCCA	22	2
MIR405b	-	188	TATTATTTAAATGGTTAACCCATTTAACA	29	2
MIR405b	-	188	TATTATTTAAATGGTTAACCCATT	24	2
MIR405b	-	188	TATTATTTAAATGGTTAA	18	2
MIR405b	-	188	TATTATTTAAATGGTTAAC	19	2
MIR405b	-	188	TATTATTTAAATGGTTAACCC	21	2
MIR405b	-	188	TATTATTTAAATGGTTAACC	20	2
MIR405b	-	189	ATTATTTAAATGGTTAACC	19	2
MIR405b	+	311	CATTTGATTATGAGTTGGGTTGGGTTGGGTTACCCA	36	2	7
MIR405b	+	312	ATTTGATTATGAGTTGGGTTGGGTTGGGTTACCC	34	2	1
MIR405b	+	312	ATTTGATTATGAGTTGGGTTGGGTTGGGTTACCCA	35	2	3
MIR405b	+	315	TGATTATGAGTTGGGTTGGGTTGGGTTACCCA	32	2	18
MIR405b	+	315	TGATTATGAGTTGGGTTGGGTTGGGTTACCC	31	2	1
MIR405b	+	316	GATTATGAGTTGGGTTGGGTTGGGTTACCCA	31	2	266
MIR405b	+	316	GATTATGAGTTGGGTTGGGTTGGGTTACCC	30	2	5
MIR405b	+	317	ATTATGAGTTGGGTTGGGTTGGGTTACCC	29	2	1
MIR405b	+	317	ATTATGAGTTGGGTTGGGTTGGGTTACCCAT	31	2	4
MIR405b	+	317	ATTATGAGTTGGGTTGGGTTGGGTTACCCA	30	2	336
MIR405b	+	318	TTATGAGTTGGGTTGGGTTGGGTTACCCA	29	2	18
MIR405b	+	318	TTATGAGTTGGGTTGGGTTGGGTTACCCAT	30	2	2
MIR405b	+	319	TATGAGTTGGGTTGGGTTGGGTTACCCA	28	2	119
MIR405b	+	320	ATGAGTTGGGTTGGGTTGGGTTACC	25	2	4
MIR405b	+	320	ATGAGTTGGGTTGGGTTGGGTTAC	24	2	2
MIR405b	+	320	ATGAGTTGGGTTGGGTTGGGTTACCC	26	2	13
MIR405b	+	320	ATGAGTTGGGTTGGGTTGGGTTACCCAT	28	2	7
MIR405b	+	320	ATGAGTTGGGTTGGGTTGGGTTACCCA	27	2	1309
MIR405b	+	321	TGAGTTGGGTTGGGTTGGGTTACCCA	26	2	203
MIR405b	+	321	TGAGTTGGGTTGGGTTGGGTTACCC	25	2	4
MIR405b	+	321	TGAGTTGGGTTGGGTTGGGTTACCCAT	27	2	1
MIR405b	+	322	GAGTTGGGTTGGGTTGGGTTACCCA	25	2	1149
MIR405b	+	322	GAGTTGGGTTGGGTTGGGTTACCC	24	2	26
MIR405b	+	322	GAGTTGGGTTGGGTTGGGTTACCCAT	26	2	8
MIR405b	+	323	AGTTGGGTTGGGTTGGGTTACCCA	24	2	511
MIR405b	+	323	AGTTGGGTTGGGTTGGGTTACCC	23	2	3
MIR405b	+	323	AGTTGGGTTGGGTTGGGTTACCCAT	25	2	8
MIR405b	+	324	GTTGGGTTGGGTTGGGTTACCCA	23	2	2210
MIR405b	+	324	GTTGGGTTGGGTTGGGTTACCCAT	24	2	6
MIR405b	+	324	GTTGGGTTGGGTTGGGTTACC	21	2	1
MIR405b	+	324	GTTGGGTTGGGTTGGGTTACCC	22	2	29
MIR405b	+	325	TTGGGTTGGGTTGGGTTACCC	21	2	9
MIR405b	+	325	TTGGGTTGGGTTGGGTTACC	20	2	2
MIR405b	+	325	TTGGGTTGGGTTGGGTTACCCAT	23	2	2
MIR405b	+	325	TTGGGTTGGGTTGGGTTACCCA	22	2	620
MIR405b	+	326	TGGGTTGGGTTGGGTTACC	19	2	6
MIR405b	+	326	TGGGTTGGGTTGGGTTACCCA	21	2	909
MIR405b	+	326	TGGGTTGGGTTGGGTTACCCAT	22	2	7
MIR405b	+	326	TGGGTTGGGTTGGGTTACCC	20	2	15
MIR405b	+	327	GGGTTGGGTTGGGTTACCCAT	21	2	37
MIR405b	+	327	GGGTTGGGTTGGGTTACC	18	2	41
MIR405b	+	327	GGGTTGGGTTGGGTTACCCA	20	2	3836
MIR405b	+	327	GGGTTGGGTTGGGTTACCC	19	2	61
MIR405b	+	328	GGTTGGGTTGGGTTACCC	18	2	1
MIR405b	+	328	GGTTGGGTTGGGTTACCCA	19	2	21
MIR405b	+	329	GTTGGGTTGGGTTACCCA	18	2	2
MIR405d	-	416	TTATTATTTAAATGGTTAACC	21	2
MIR405d	-	417	TATTATTTAAATGGTTAACCCA	22	2
MIR405d	-	417	TATTATTTAAATGGTTAACCCATTTAACA	29	2
MIR405d	-	417	TATTATTTAAATGGTTAACCCATT	24	2
MIR405d	-	417	TATTATTTAAATGGTTAA	18	2
MIR405d	-	417	TATTATTTAAATGGTTAAC	19	2
MIR405d	-	417	TATTATTTAAATGGTTAACCC	21	2
MIR405d	-	417	TATTATTTAAATGGTTAACC	20	2
MIR405d	-	418	ATTATTTAAATGGTTAACC	19	2
MIR405d	+	539	CATTTGATTATGAGTTGGGTTGGGTTGGGTTACCCA	36	2	7
MIR405d	+	540	ATTTGATTATGAGTTGGGTTGGGTTGGGTTACCC	34	2	1
MIR405d	+	540	ATTTGATTATGAGTTGGGTTGGGTTGGGTTACCCA	35	2	3
MIR405d	+	543	TGATTATGAGTTGGGTTGGGTTGGGTTACCCA	32	2	18
MIR405d	+	543	TGATTATGAGTTGGGTTGGGTTGGGTTACCC	31	2	1
MIR405d	+	544	GATTATGAGTTGGGTTGGGTTGGGTTACCCA	31	2	266
MIR405d	+	544	GATTATGAGTTGGGTTGGGTTGGGTTACCC	30	2	5
MIR405d	+	545	ATTATGAGTTGGGTTGGGTTGGGTTACCC	29	2	1
MIR405d	+	545	ATTATGAGTTGGGTTGGGTTGGGTTACCCAT	31	2	4
MIR405d	+	545	ATTATGAGTTGGGTTGGGTTGGGTTACCCA	30	2	336
MIR405d	+	546	TTATGAGTTGGGTTGGGTTGGGTTACCCA	29	2	18
MIR405d	+	546	TTATGAGTTGGGTTGGGTTGGGTTACCCAT	30	2	2
MIR405d	+	547	TATGAGTTGGGTTGGGTTGGGTTACCCA	28	2	119
MIR405d	+	548	ATGAGTTGGGTTGGGTTGGGTTACC	25	2	4
MIR405d	+	548	ATGAGTTGGGTTGGGTTGGGTTAC	24	2	2
MIR405d	+	548	ATGAGTTGGGTTGGGTTGGGTTACCC	26	2	13
MIR405d	+	548	ATGAGTTGGGTTGGGTTGGGTTACCCAT	28	2	7
MIR405d	+	548	ATGAGTTGGGTTGGGTTGGGTTACCCA	27	2	1309
MIR405d	+	549	TGAGTTGGGTTGGGTTGGGTTACCCA	26	2	203
MIR405d	+	549	TGAGTTGGGTTGGGTTGGGTTACCC	25	2	4
MIR405d	+	549	TGAGTTGGGTTGGGTTGGGTTACCCAT	27	2	1
MIR405d	+	550	GAGTTGGGTTGGGTTGGGTTACCCA	25	2	1149
MIR405d	+	550	GAGTTGGGTTGGGTTGGGTTACCC	24	2	26
MIR405d	+	550	GAGTTGGGTTGGGTTGGGTTACCCAT	26	2	8
MIR405d	+	551	AGTTGGGTTGGGTTGGGTTACCCA	24	2	511
MIR405d	+	551	AGTTGGGTTGGGTTGGGTTACCC	23	2	3
MIR405d	+	551	AGTTGGGTTGGGTTGGGTTACCCAT	25	2	8
MIR405d	+	552	GTTGGGTTGGGTTGGGTTACCCA	23	2	2210
MIR405d	+	552	GTTGGGTTGGGTTGGGTTACCCAT	24	2	6
MIR405d	+	552	GTTGGGTTGGGTTGGGTTACC	21	2	1
MIR405d	+	552	GTTGGGTTGGGTTGGGTTACCC	22	2	29
MIR405d	+	553	TTGGGTTGGGTTGGGTTACCC	21	2	9
MIR405d	+	553	TTGGGTTGGGTTGGGTTACC	20	2	2
MIR405d	+	553	TTGGGTTGGGTTGGGTTACCCAT	23	2	2
MIR405d	+	553	TTGGGTTGGGTTGGGTTACCCA	22	2	620
MIR405d	+	554	TGGGTTGGGTTGGGTTACC	19	2	6
MIR405d	+	554	TGGGTTGGGTTGGGTTACCCA	21	2	909
MIR405d	+	554	TGGGTTGGGTTGGGTTACCCAT	22	2	7
MIR405d	+	554	TGGGTTGGGTTGGGTTACCC	20	2	15
MIR405d	+	555	GGGTTGGGTTGGGTTACCCAT	21	2	37
MIR405d	+	555	GGGTTGGGTTGGGTTACC	18	2	41
MIR405d	+	555	GGGTTGGGTTGGGTTACCCA	20	2	3836
MIR405d	+	555	GGGTTGGGTTGGGTTACCC	19	2	61
MIR405d	+	556	GGTTGGGTTGGGTTACCC	18	2	1
MIR405d	+	556	GGTTGGGTTGGGTTACCCA	19	2	21
MIR405d	+	557	GTTGGGTTGGGTTACCCA	18	2	2
MIR406	+	1397	AAAAATCGATTAACTAAAAAGGATGG	26	1	3
MIR406	+	1398	AAAATCGATTAACTAAAAAGGATGG	25	1	22
MIR406	+	1399	AAATCGATTAACTAAAAAGGATGG	24	1	69
MIR406	+	1400	AATCGATTAACTAAAAAGGATGG	23	1	196
MIR406	+	1400	AATCGATTAACTAAAAAGGATG	22	1	2
MIR406	+	1401	ATCGATTAACTAAAAAGGATG	21	1	3
MIR406	+	1401	ATCGATTAACTAAAAAGGATGG	22	1	592
MIR406	+	1402	TCGATTAACTAAAAAGGATGG	21	1	1639
MIR406	+	1402	TCGATTAACTAAAAAGGATG	20	1	2
MIR406	+	1403	CGATTAACTAAAAAGGATGGA	21	1	1
MIR406	+	1403	CGATTAACTAAAAAGGATGG	20	1	10574
MIR406	+	1403	CGATTAACTAAAAAGGATG	19	1	109
MIR406	+	1404	GATTAACTAAAAAGGATG	18	1	576
MIR406	+	1404	GATTAACTAAAAAGGATGG	19	1	90651
MIR406	+	1405	ATTAACTAAAAAGGATGG	18	1	485
MIR407	+	253	ATGTAATCTTTTATTTAAT	19	1	1
MIR407	+	1011	GTGATTTTTCATCCCATTTTTCAAAGTTGGCAA	33	1	1
MIR407	+	1012	TGATTTTTCATCCCATTTTTCAAAGTTGGCAA	32	1	3
MIR407	+	1014	ATTTTTCATCCCATTTTTCAAAGTTGGCAA	30	1	1
MIR407	+	1015	TTTTTCATCCCATTTTTCAAAGTTGGCAA	29	1	2
MIR407	+	1016	TTTTCATCCCATTTTTCAAAGTTGGCAA	28	1	3
MIR407	+	1017	TTTCATCCCATTTTTCAAAGTTGGCAA	27	1	3
MIR407	+	1018	TTCATCCCATTTTTCAAAGTTGGCAA	26	1	1
MIR407	+	1019	TCATCCCATTTTTCAAAGTTGGCAA	25	1	10
MIR407	+	1020	CATCCCATTTTTCAAAGTTGGCAA	24	1	52
MIR407	+	1021	ATCCCATTTTTCAAAGTTGGCAA	23	1	104
MIR407	+	1022	TCCCATTTTTCAAAGTTGGCAA	22	1	75
MIR407	+	1023	CCCATTTTTCAAAGTTGGCAA	21	1	987
MIR407	+	1023	CCCATTTTTCAAAGTTGGCA	20	1	3
MIR407	+	1024	CCATTTTTCAAAGTTGGCA	19	1	6
MIR407	+	1024	CCATTTTTCAAAGTTGGCAAT	21	1	2
MIR407	+	1024	CCATTTTTCAAAGTTGGCAA	20	1	6588
MIR407	+	1025	CATTTTTCAAAGTTGGCAA	19	1	19836
MIR407	+	1025	CATTTTTCAAAGTTGGCA	18	1	42
MIR407	+	1025	CATTTTTCAAAGTTGGCAAT	20	1	12
MIR407	+	1026	ATTTTTCAAAGTTGGCAA	18	1	165
MIR408	+	513	GACAAAGCGGTAATGAGAGAGAGACAGGGAACAAGCAGAGCATGGATTGA	50	1	3
MIR408	+	603	ATGCACTGCCTCTTCCCTGGCTCCCTCTTTTTTTCTCTATATTTCTCTCT	50	1	2
MIR408	+	604	TGCACTGCCTCTTCCCTGGCTCCCTCTTTTTTTCTCTATATTTCTCTCTC	50	1	6
MIR408	+	610	GCCTCTTCCCTGGCTCCCTCTTTTTTTCTCTATATTTCTCTCTCTCCTTT	50	1	4
MIR408	+	617	CCCTGGCTCCCTCTTTTTTTCTCTATATTTCTCTCTCTCCTTTCATTTCA	50	1	4
MIR408	+	624	TCCCTCTTTTTTTCTCTATATTTCTCTCTCTCCTTTCATTTCACAGCTTT	50	1	39
MIR408	+	625	CCCTCTTTTTTTCTCTATATTTCTCTCTCTCCTTTCATTTCACAGCTTTC	50	1	18
MIR408	+	634	TTTCTCTATATTTCTCTCTCTCCTTTCATTTCACAGCTTTC	41	1	1
MIR408	-	640	TATATTTCTCTCTCTCCTTTCATTTCACAGCTTTCAATGGAATTTTATTG	50	1
MIR408	+	643	ATTTCTCTCTCTCCTTTCATTTCACAGCTTTC	32	1	5
MIR408	+	646	TCTCTCTCTCCTTTCATTTCACAGCTTTC	29	1	1
MIR408	+	647	CTCTCTCTCCTTTCATTTCACAGCTTTC	28	1	4
MIR408	+	648	TCTCTCTCCTTTCATTTCACAGCTTTC	27	1	3
MIR408	+	649	CTCTCTCCTTTCATTTCACAGCTTT	25	1	1
MIR408	+	649	CTCTCTCCTTTCATTTCACAGCTTTC	26	1	22
MIR408	+	650	TCTCTCCTTTCATTTCACAGCTTTC	25	1	64
MIR408	+	650	TCTCTCCTTTCATTTCACAGCTTT	24	1	1
MIR408	+	651	CTCTCCTTTCATTTCACAGCTTTC	24	1	66
MIR408	+	652	TCTCCTTTCATTTCACAGCTTT	22	1	10
MIR408	+	652	TCTCCTTTCATTTCACAGCTTTC	23	1	89
MIR408	+	653	CTCCTTTCATTTCACAGCTTTC	22	1	356
MIR408	+	654	TCCTTTCATTTCACAGCTTT	20	1	3
MIR408	+	654	TCCTTTCATTTCACAGCTTTC	21	1	682
MIR408	+	655	CCTTTCATTTCACAGCTTTC	20	1	25675
MIR408	+	655	CCTTTCATTTCACAGCTT	18	1	19
MIR408	+	655	CCTTTCATTTCACAGCTTT	19	1	178
MIR408	+	656	CTTTCATTTCACAGCTTTC	19	1	163197
MIR408	+	656	CTTTCATTTCACAGCTTT	18	1	967
MIR408	+	657	TTTCATTTCACAGCTTTC	18	1	752
MIR408	-	856	CTCAATGGCATGGTGAGTGATTCCCACACGGTGATCCGTTACTCGCCCTT	50	1
MIR408	+	1085	TCATATAGCCTTGCACATAGTACTTTAAGTGCTTTGGCTCTGTTCTGTTA	50	1	10
MIR408	+	1133	TACAAAGATATTAAATTTTTCAGTAGGATGTGTAAGATTAAGGGAGTAAA	50	1	3
MIR408	-	3628	AATGATACACTGAGTATAACAGT	23	1
MIR413	+	1226	GTGGCTATGCAGAAACTGGAACTATTCGTCTTTGGTAGGAACAAATTATG	50	1	4
MIR413	+	1236	AGAAACTGGAACTATTCGTCTTTGGTAGGAACAAATTATGGCTATTGAAA	50	1	1
MIR413	+	1279	ATTGAAAACTGAAGATGATGAGGAGCAT	28	1	1
MIR413	+	1280	TTGAAAACTGAAGATGATGAGGAGCAT	27	1	24
MIR413	+	1281	TGAAAACTGAAGATGATGAGGAGCAT	26	1	35
MIR413	+	1281	TGAAAACTGAAGATGATGAGGAGCA	25	1	2
MIR413	+	1282	GAAAACTGAAGATGATGAGGAGCAT	25	1	24
MIR413	+	1283	AAAACTGAAGATGATGAGGAGCAT	24	1	90
MIR413	+	1284	AAACTGAAGATGATGAGGAGCA	22	1	7
MIR413	+	1284	AAACTGAAGATGATGAGGAGCAT	23	1	125
MIR413	+	1285	AACTGAAGATGATGAGGAGCAT	22	1	641
MIR413	+	1285	AACTGAAGATGATGAGGAGCA	21	1	4
MIR413	+	1286	ACTGAAGATGATGAGGAGCAT	21	1	1700
MIR413	+	1286	ACTGAAGATGATGAGGAGCA	20	1	8
MIR413	+	1286	ACTGAAGATGATGAGGAGC	19	1	1
MIR413	+	1287	CTGAAGATGATGAGGAGC	18	1	8
MIR413	+	1287	CTGAAGATGATGAGGAGCAT	20	1	30775
MIR413	+	1287	CTGAAGATGATGAGGAGCA	19	1	234
MIR413	+	1288	TGAAGATGATGAGGAGCA	18	1	736
MIR413	+	1288	TGAAGATGATGAGGAGCAT	19	1	95137
MIR413	+	1289	GAAGATGATGAGGAGCAT	18	1	3709
MIR413	-	1784	CAATCGGAACATGTTTCATATGTTCCAAGTATACCGAGAACCATAGATTA	50	1
MIR413	-	1804	TGTTCCAAGTATACCGAGAACCATAGATTATACATATTATAAGCTGTTTA	50	1
MIR414	+	1729	TTAACTTTTTTGTTGGGATATACTGTATTCTTGAATTAAGTTGTTGAGAT	50	1	1
MIR414	+	1859	AGGATGAGACTAGGAAAGATTGTGGAAGGCTTGAAGTCGAAGATAAAGAC	50	1	2
MIR414	+	1905	AGACTGGTCTAAGGATGCGGAAGAGATCATCATTATCATCATCA	44	1	2
MIR414	+	1940	TCATCATCATCATATTCATCTTCATCATCATCGTCATCATCATCATCATC	50	1	2
MIR414	+	1955	TCATCTTCATCATCATCGTCATCATCATCATCATCA	36	1	2
MIR414	+	1998	AGAAGATAGAGAAGAGTGAGAGTATGAGATTTGAGTTGAGAAGCAAAAAG	50	1	3
MIR414	+	1999	GAAGATAGAGAAGAGTGAGAGTATGAGATTTGAGTTGAGAAGCAAAAAGG	50	1	3
MIR414	+	2001	AGATAGAGAAGAGTGAGAGTATGAGATTTGAGTTGAGAAGCAAAAAGGCT	50	1	1
MIR414	+	2004	TAGAGAAGAGTGAGAGTATGAGATTTGAGTTGAGAAGCAAAAAGGCTCAC	50	1	4
MIR414	+	2007	AGAAGAGTGAGAGTATGAGATTTGAGTTGAGAAGCAAAAAGGCTCACAAA	50	1	3
MIR414	+	2009	AAGAGTGAGAGTATGAGATTTGAGTTGAGAAGCAAAAAGGCTCACAAAAT	50	1	9
MIR414	+	2010	AGAGTGAGAGTATGAGATTTGAGTTGAGAAGCAAAAAGGCTCACAAAATT	50	1	2
MIR414	+	2012	AGTGAGAGTATGAGATTTGAGTTGAGAAGCAAAAAGGCTCACAAAATTAT	50	1	6
MIR414	+	2019	GTATGAGATTTGAGTTGAGAAGCAAAAAGGCTCACAAAATTATCCAAGAA	50	1	9
MIR414	+	2024	AGATTTGAGTTGAGAAGCAAAAAGGCTCACAAAATTATCCAAGAA	45	1	3
MIR414	+	2026	ATTTGAGTTGAGAAGCAAAAAGGCTCACAAAATTATCCAAGAA	43	1	1
MIR414	+	2027	TTTGAGTTGAGAAGCAAAAAGGCTCACAAAATTATCCAAGAA	42	1	1
MIR414	+	2028	TTGAGTTGAGAAGCAAAAAGGCTCACAAAATTATCCAAGA	40	1	1
MIR414	+	2028	TTGAGTTGAGAAGCAAAAAGGCTCACAAAATTATCCAAGAA	41	1	1
MIR414	+	2031	AGTTGAGAAGCAAAAAGGCTCACAAAATTATCCAAGAA	38	1	3
MIR414	+	2033	TTGAGAAGCAAAAAGGCTCACAAAATTATCCAAGAA	36	1	4
MIR414	+	2034	TGAGAAGCAAAAAGGCTCACAAAATTATCCAAGAA	35	1	2
MIR414	+	2036	AGAAGCAAAAAGGCTCACAAAATTATCCAAGAA	33	1	9
MIR414	+	2037	GAAGCAAAAAGGCTCACAAAATTATCCAAGAA	32	1	10
MIR414	+	2038	AAGCAAAAAGGCTCACAAAATTATCCAAGAA	31	1	1
MIR414	+	2039	AGCAAAAAGGCTCACAAAATTATCCAAGAA	30	1	2
MIR414	+	2040	GCAAAAAGGCTCACAAAATTATCCAAGAA	29	1	3
MIR414	+	2041	CAAAAAGGCTCACAAAATTATCCAAGAA	28	1	12
MIR414	+	2042	AAAAAGGCTCACAAAATTATCCAAGAA	27	1	11
MIR414	+	2043	AAAAGGCTCACAAAATTATCCAAGAA	26	1	6
MIR414	+	2044	AAAGGCTCACAAAATTATCCAAGAA	25	1	6
MIR414	+	2045	AAGGCTCACAAAATTATCCAAGA	23	1	1
MIR414	+	2045	AAGGCTCACAAAATTATCCAAGAA	24	1	113
MIR414	+	2046	AGGCTCACAAAATTATCCAAGAA	23	1	190
MIR414	+	2046	AGGCTCACAAAATTATCCAAG	21	1	1
MIR414	+	2046	AGGCTCACAAAATTATCCAAGA	22	1	4
MIR414	+	2046	AGGCTCACAAAATTATCCAAGAAA	24	1	1
MIR414	+	2047	GGCTCACAAAATTATCCAAGAA	22	1	64
MIR414	+	2047	GGCTCACAAAATTATCCAAGA	21	1	1
MIR414	+	2048	GCTCACAAAATTATCCAAGAA	21	1	7463
MIR414	+	2048	GCTCACAAAATTATCCAAGAAA	22	1	1
MIR414	+	2048	GCTCACAAAATTATCCAAGA	20	1	48
MIR414	+	2049	CTCACAAAATTATCCAAG	18	1	54
MIR414	+	2049	CTCACAAAATTATCCAAGA	19	1	1730
MIR414	+	2049	CTCACAAAATTATCCAAGAAA	21	1	83
MIR414	+	2049	CTCACAAAATTATCCAAGAA	20	1	256259
MIR414	+	2050	TCACAAAATTATCCAAGAA	19	1	250963
MIR414	+	2050	TCACAAAATTATCCAAGAAA	20	1	97
MIR414	+	2050	TCACAAAATTATCCAAGA	18	1	1618
MIR414	+	2051	CACAAAATTATCCAAGAA	18	1	7767
MIR414	+	2051	CACAAAATTATCCAAGAAA	19	1	2
MIR416	+	341	AAATGATTTCTGGGTTTCGGCGAAGTTGACATTTGAG	37	1	5
MIR416	+	343	ATGATTTCTGGGTTTCGGCGAAGTTGACATTTGAG	35	1	1
MIR416	+	345	GATTTCTGGGTTTCGGCGAAGTTGACATTTGAG	33	1	20
MIR416	+	346	ATTTCTGGGTTTCGGCGAAGTTGACATTTGAG	32	1	4
MIR416	+	347	TTTCTGGGTTTCGGCGAAGTTGACATTTGAG	31	1	13
MIR416	+	348	TTCTGGGTTTCGGCGAAGTTGACATTTGAG	30	1	1
MIR416	+	349	TCTGGGTTTCGGCGAAGTTGACATTTGAG	29	1	30
MIR416	+	350	CTGGGTTTCGGCGAAGTTGACATTTGAG	28	1	3
MIR416	+	351	TGGGTTTCGGCGAAGTTGACATTTGAG	27	1	26
MIR416	+	352	GGGTTTCGGCGAAGTTGACATTTGAG	26	1	95
MIR416	+	353	GGTTTCGGCGAAGTTGACATTTGAG	25	1	69
MIR416	+	354	GTTTCGGCGAAGTTGACATTTGAG	24	1	71
MIR416	+	355	TTTCGGCGAAGTTGACATTTGAG	23	1	39
MIR416	+	355	TTTCGGCGAAGTTGACATTTGA	22	1	2
MIR416	+	356	TTCGGCGAAGTTGACATTTGA	21	1	9
MIR416	+	356	TTCGGCGAAGTTGACATTTGAG	22	1	772
MIR416	+	357	TCGGCGAAGTTGACATTTGA	20	1	48
MIR416	+	357	TCGGCGAAGTTGACATTTGAG	21	1	3518
MIR416	+	358	CGGCGAAGTTGACATTTGAG	20	1	74559
MIR416	+	358	CGGCGAAGTTGACATTTGA	19	1	756
MIR416	+	358	CGGCGAAGTTGACATTTG	18	1	19
MIR416	+	359	GGCGAAGTTGACATTTGAG	19	1	20774
MIR416	+	359	GGCGAAGTTGACATTTGA	18	1	124
MIR416	+	360	GCGAAGTTGACATTTGAG	18	1	1846
MIR416	-	569	AATTGTGTTACGGTGAAGAAT	21	1
MIR417	+	871	CAGTAGTGTAAGTGGAGCAAATGCG	25	1	2
MIR417	+	872	AGTAGTGTAAGTGGAGCAAATGCG	24	1	53
MIR417	+	873	GTAGTGTAAGTGGAGCAAATGCGT	24	1	7
MIR417	+	873	GTAGTGTAAGTGGAGCAAATGCG	23	1	2422
MIR417	+	873	GTAGTGTAAGTGGAGCAAATGC	22	1	13
MIR417	+	874	TAGTGTAAGTGGAGCAAATGCG	22	1	2915
MIR417	+	874	TAGTGTAAGTGGAGCAAATGC	21	1	21
MIR417	+	874	TAGTGTAAGTGGAGCAAATGCGT	23	1	32
MIR417	+	875	AGTGTAAGTGGAGCAAATGCGT	22	1	28
MIR417	+	875	AGTGTAAGTGGAGCAAATGCG	21	1	8320
MIR417	+	875	AGTGTAAGTGGAGCAAATG	19	1	2
MIR417	+	875	AGTGTAAGTGGAGCAAATGC	20	1	32
MIR417	+	876	GTGTAAGTGGAGCAAATGCGT	21	1	200
MIR417	+	876	GTGTAAGTGGAGCAAATGC	19	1	201
MIR417	+	876	GTGTAAGTGGAGCAAATGCG	20	1	49866
MIR417	+	876	GTGTAAGTGGAGCAAATG	18	1	29
MIR417	+	877	TGTAAGTGGAGCAAATGCG	19	1	44
MIR417	+	878	GTAAGTGGAGCAAATGCG	18	1	150
MIR418	+	1209	GTAAATCCTCCATTTGTTAGTTGTCCT	27	1	1
MIR418	+	1210	TAAATCCTCCATTTGTTAGTTGTCCT	26	1	19
MIR418	+	1211	AAATCCTCCATTTGTTAGTTGTCCT	25	1	99
MIR418	+	1212	AATCCTCCATTTGTTAGTTGTCC	23	1	2
MIR418	+	1212	AATCCTCCATTTGTTAGTTGTCCT	24	1	415
MIR418	+	1213	ATCCTCCATTTGTTAGTTGTCCTT	24	1	4
MIR418	+	1213	ATCCTCCATTTGTTAGTTGTCC	22	1	15
MIR418	+	1213	ATCCTCCATTTGTTAGTTGTCCT	23	1	2142
MIR418	+	1214	TCCTCCATTTGTTAGTTGTCCT	22	1	3204
MIR418	+	1214	TCCTCCATTTGTTAGTTGTCC	21	1	14
MIR418	+	1214	TCCTCCATTTGTTAGTTGTC	20	1	6
MIR418	+	1214	TCCTCCATTTGTTAGTTGTCCTT	23	1	17
MIR418	+	1215	CCTCCATTTGTTAGTTGTCCT	21	1	21845
MIR418	+	1215	CCTCCATTTGTTAGTTGTC	19	1	25
MIR418	+	1215	CCTCCATTTGTTAGTTGTCC	20	1	180
MIR418	+	1215	CCTCCATTTGTTAGTTGT	18	1	2
MIR418	+	1215	CCTCCATTTGTTAGTTGTCCTT	22	1	103
MIR418	+	1216	CTCCATTTGTTAGTTGTCCT	20	1	162000
MIR418	+	1216	CTCCATTTGTTAGTTGTCC	19	1	1372
MIR418	+	1216	CTCCATTTGTTAGTTGTC	18	1	86
MIR418	+	1216	CTCCATTTGTTAGTTGTCCTT	21	1	559
MIR418	+	1217	TCCATTTGTTAGTTGTCCTT	20	1	739
MIR418	+	1217	TCCATTTGTTAGTTGTCCT	19	1	278713
MIR418	+	1217	TCCATTTGTTAGTTGTCCTTT	21	1	1
MIR418	+	1217	TCCATTTGTTAGTTGTCC	18	1	2319
MIR418	+	1218	CCATTTGTTAGTTGTCCT	18	1	1705
MIR418	+	1218	CCATTTGTTAGTTGTCCTT	19	1	3
MIR418	+	1219	CATTTGTTAGTTGTCCTT	18	1	10
MIR419	+	520	AACTGACTCTTCGATATAAGAACTTGTGAAGTAAAAACTCTATGTGATGA	50	1	3
MIR419	+	564	TGATGAAATTATGAATGCTGAGGATGTTGTTATTACGAGCAATGAGATGT	50	1	1
MIR419	+	690	CTCAATTCTGGTAACTACTGGCAGTAACAAGAA	33	1	5
MIR419	+	691	TCAATTCTGGTAACTACTGGCAGTAACAAGAAA	33	1	1
MIR419	+	694	ATTCTGGTAACTACTGGCAGTAACAAGAAA	30	1	3
MIR419	+	698	TGGTAACTACTGGCAGTAACAAGAAA	26	1	2
MIR419	+	699	GGTAACTACTGGCAGTAACAAGAAA	25	1	2
MIR419	+	700	GTAACTACTGGCAGTAACAAGAAA	24	1	5
MIR419	+	701	TAACTACTGGCAGTAACAAGAAA	23	1	32
MIR419	+	701	TAACTACTGGCAGTAACAAGAA	22	1	1
MIR419	+	702	AACTACTGGCAGTAACAAGAA	21	1	2
MIR419	+	702	AACTACTGGCAGTAACAAGAAA	22	1	72
MIR419	+	703	ACTACTGGCAGTAACAAGAAA	21	1	616
MIR419	+	703	ACTACTGGCAGTAACAAGAA	20	1	5
MIR419	+	704	CTACTGGCAGTAACAAGAAA	20	1	39371
MIR419	+	704	CTACTGGCAGTAACAAGA	18	1	19
MIR419	+	704	CTACTGGCAGTAACAAGAA	19	1	497
MIR419	+	704	CTACTGGCAGTAACAAGAAAA	21	1	13
MIR419	+	705	TACTGGCAGTAACAAGAAA	19	1	19425
MIR419	+	705	TACTGGCAGTAACAAGAAAA	20	1	10
MIR419	+	705	TACTGGCAGTAACAAGAA	18	1	230
MIR419	+	706	ACTGGCAGTAACAAGAAA	18	1	183
MIR420	+	697	CCAAATATCAAAAAACCAAAAACAGAACCTAGAAACCACACCAAAAAAAA	50	1	1
MIR420	+	712	CCAAAAACAGAACCTAGAAACCACACCAAAAAAAAAAAAGCTATTTCATC	50	1	1
MIR420	+	1360	AATGGAACTGGTCTTTTCATGGAACTCGTTTACGTCACCATCTTCTTTGT	50	1	1
MIR420	+	1678	ATCGAGGTAATATTCATGGCGGTGGTGATCTTCTGCACAATGTATTTTTT	50	1	2
MIR420	+	1686	AATATTCATGGCGGTGGTGATCTTCTGCACAATGTATTTTTTGCATACAA	50	1	2
MIR420	+	1696	GCGGTGGTGATCTTCTGCACAATGTATTTTTTGCATACAACAAAGCAGAG	50	1	1
MIR420	+	1699	GTGGTGATCTTCTGCACAATGTATTTTTTGCATACAACAAAGCAGAGATC	50	1	1
MIR420	+	1715	CAATGTATTTTTTGCATACAACAAAGCAGAGATCAATGCTTATTGGGATC	50	1	3
MIR420	+	1738	AAGCAGAGATCAATGCTTATTGGGATCTTGTGCATTGTTTTCAACGTCAT	50	1	4
MIR420	+	1740	GCAGAGATCAATGCTTATTGGGATCTTGTGCATTGTTTTCAACGTCATCA	50	1	1
MIR420	+	1756	ATTGGGATCTTGTGCATTGTTTTCAACGTCATCATGTATGCTGCTCCTCT	50	1	1
MIR420	+	1929	GTTATAATGTGGAACAGAAACTTGTGATAAAGACAAAGAGCGTGAAATAC	50	1	3
MIR420	+	1935	ATGTGGAACAGAAACTTGTGATAAAGACAAAGAGCGTGAAATACA	45	1	2
MIR420	+	1945	GAAACTTGTGATAAAGACAAAGAGCGTGAAATACA	35	1	3
MIR420	+	1947	AACTTGTGATAAAGACAAAGAGCGTGAAATACA	33	1	3
MIR420	+	1949	CTTGTGATAAAGACAAAGAGCGTGAAATACA	31	1	2
MIR420	+	1950	TTGTGATAAAGACAAAGAGCGTGAAATACA	30	1	1
MIR420	+	1951	TGTGATAAAGACAAAGAGCGTGAAATACA	29	1	2
MIR420	+	1953	TGATAAAGACAAAGAGCGTGAAATACA	27	1	3
MIR420	+	1954	GATAAAGACAAAGAGCGTGAAATACA	26	1	6
MIR420	+	1955	ATAAAGACAAAGAGCGTGAAATACA	25	1	13
MIR420	+	1956	TAAAGACAAAGAGCGTGAAATACA	24	1	3
MIR420	+	1957	AAAGACAAAGAGCGTGAAATAC	22	1	1
MIR420	+	1957	AAAGACAAAGAGCGTGAAATACA	23	1	47
MIR420	+	1958	AAGACAAAGAGCGTGAAATACAT	23	1	2
MIR420	+	1958	AAGACAAAGAGCGTGAAATAC	21	1	3
MIR420	+	1958	AAGACAAAGAGCGTGAAATACA	22	1	129
MIR420	+	1959	AGACAAAGAGCGTGAAAT	18	1	3
MIR420	+	1959	AGACAAAGAGCGTGAAATACA	21	1	731
MIR420	+	1959	AGACAAAGAGCGTGAAATAC	20	1	4
MIR420	+	1960	GACAAAGAGCGTGAAATAC	19	1	14
MIR420	+	1960	GACAAAGAGCGTGAAATACA	20	1	1136
MIR420	+	1960	GACAAAGAGCGTGAAATA	18	1	2
MIR420	+	1961	ACAAAGAGCGTGAAATACA	19	1	18
MIR420	+	1961	ACAAAGAGCGTGAAATACAT	20	1	2
MIR420	+	1962	CAAAGAGCGTGAAATACAT	19	1	4
MIR420	+	1962	CAAAGAGCGTGAAATACA	18	1	1930
MIR420	+	1963	AAAGAGCGTGAAATACAT	18	1	314
MIR426	-	636	TTCAATTTTACAAAATTTG	19	2
MIR426	+	1669	ATCAAATGAATGATAGAATTTAACTCG	27	1	3
MIR426	+	1670	TCAAATGAATGATAGAATTTAACTCG	26	1	2
MIR426	+	1670	TCAAATGAATGATAGAATTTAACTC	25	1	4
MIR426	+	1671	CAAATGAATGATAGAATTTAACTCG	25	1	1
MIR426	+	1672	AAATGAATGATAGAATTTAACTC	23	1	1
MIR426	+	1672	AAATGAATGATAGAATTTAACTCG	24	1	63
MIR426	+	1673	AATGAATGATAGAATTTAACTCG	23	1	202
MIR426	+	1673	AATGAATGATAGAATTTAACTC	22	1	8
MIR426	+	1674	ATGAATGATAGAATTTAACTC	21	1	7
MIR426	+	1674	ATGAATGATAGAATTTAACTCG	22	1	446
MIR426	+	1675	TGAATGATAGAATTTAACTC	20	1	3
MIR426	+	1675	TGAATGATAGAATTTAACTCG	21	1	328
MIR426	+	1675	TGAATGATAGAATTTAAC	18	1	1
MIR426	+	1676	GAATGATAGAATTTAACT	18	1	2
MIR426	+	1676	GAATGATAGAATTTAACTC	19	1	76
MIR426	+	1676	GAATGATAGAATTTAACTCG	20	1	3697
MIR426	+	1677	AATGATAGAATTTAACTCG	19	1	14
MIR426	+	1678	ATGATAGAATTTAACTCG	18	1	11
MIR447a	+	501	TTTGGAGGATTGGGGACAGATTAGATACTGTTGAATGCATCACTCTAATG	50	1	1
MIR447a	+	662	TACAACACATACATATGTTCTGCTTCTGCAAAACTAACATATCAAGTTCA	50	1	1
MIR447a	-	1032	TTCTTAATATATAATACTACT	21	1
MIR447a	-	1032	TTCTTAATATATAATACTAC	20	1
MIR447a	+	1224	AGGGGCTTTATGGAAGAAATTGTAGTATTATATATCGAGAG	41	1	4
MIR447a	+	1230	TTTATGGAAGAAATTGTAGTATTATATATCGAGAG	35	1	3
MIR447a	+	1231	TTATGGAAGAAATTGTAGTATTATATATCGAGAG	34	1	64
MIR447a	+	1231	TTATGGAAGAAATTGTAGTATTATATATCGAGAGT	35	1	1
MIR447a	+	1232	TATGGAAGAAATTGTAGTATTATATATCGAGAG	33	1	250
[truncated: 791 more rows]
