# Supplementary material for: Multiple RNA recognition patterns during microRNA biogenesis in plants
Source: HighWire-hosted journal article supplement (doi:10.1101/gr.153387.112), 2013-08-29
Supplement: Table_S3.xlsx [file Table_S3.xlsx]

## Sheet: Total
	fiery							Columbia
	Cuts flanking miRNA/miRNA* 1			Cuts flanking miRNA/miRNA* 1				Cuts flanking miRNA/miRNA* 1			Cuts flanking miRNA/miRNA* 1
	(%)			(absolute number of reads)				(%)			(absolute number of reads)
MIRNA	proximal	distal		Total	proximal	distal		proximal	distal		Total	proximal	distal
MIR156a	0.73	0.23		30	22	7		0.66	0.33		3	2	1
MIR156b	0.74	0.05		59	44	3		0.66	0		3	2	0
MIR156c	0.9	0.05		585	530	32		0.71	0.28		7	5	2
MIR156d	0.24	0.43		236	58	102		0.3	0.6		10	3	6
MIR156e	-	-		0	-	-		-	-		0	-	-
MIR156f	-	-		0	-	-		-	-		0	-	-
MIR156g	0	0.5		2	0	1		0	0		3	0	0
MIR156h	0.68	0.18		16	11	3		-	-		0	-	-
MIR157a	-	-		0	-	-		-	-		0	-	-
MIR157b	0	0		1	0	0		-	-		0	-	-
MIR157c	0	0		6	0	0		-	-		0	-	-
MIR157d	-	-		0	-	-		1	0		1	1	0
MIR158a	0.87	0		409	356	1		0.25	0		4	1	0
MIR158b	0	0		3	0	0		-	-		0	-	-
MIR159a	-	-		0	-	-		0.37	0.04		24	9	1
MIR159b	0.69	0.06		43	30	3		0.03	0.06		30	1	2
MIR159c	-	-		0	-	-		-	-		0	-	-
MIR160a	0.68	0.28		342	235	99		0.25	0.5		8	2	4
MIR160b	0	0.66		3	0	2		-	-		0	-	-
MIR160c	0.25	0.25		4	1	1		0.22	0.38		36	8	14
MIR161.2	0.12	0.01		663	83	8		0.38	0		52	20	0
MIR162a	0	0		1	0	0		0.33	0		3	1	0
MIR162b	0.54	0.36		11	6	4		0.36	0.54		11	4	6
MIR163	0.01	0		311	6	0		0.08	0		34	3	0
MIR164a	-	-		0	-	-		0	0		7	0	0
MIR164b	0.78	0		1972	1543	7		0.94	0		17	16	0
MIR164c	1	0		9	9	0		0.28	0		7	2	0
MIR165a	0.9	0		11	10	0		1	0		33	33	0
MIR165b	0.96	0		25	24	0		1	0		57	57	0
MIR166a	0.97	0		127	124	0		0.96	0		131	126	0
MIR166b	0.86	0		181	157	0		0.94	0		401	380	0
MIR166c	-	-		0	-	-		0	0		4	0	0
MIR166d	1	0		1	1	0		1	0		1	1	0
MIR166e	0.88	0		60	53	0		0.92	0		99	92	0
MIR166f	0.27	0		29	8	0		0	0		17	0	0
MIR166g	-	-		0	-	-		-	-		0	-	-
MIR167a	0.94	0		100	94	0		0.11	0		34	4	0
MIR167b	0.69	0.01		185	129	3		0	0		9	0	0
MIR167c	0	0		1	0	0		0	0		3	0	0
MIR167d	0.97	0		73	71	0		0.69	0		33	23	0
MIR168a	0.98	0		2922	2887	0		0.93	0		957	893	5
MIR168b	0.98	0.01		60	59	1		0.85	0		75	64	0
MIR169a	0.94	0		596	565	0		0.69	0		26	18	0
MIR169b	0	0		3	0	0		-	-		0	-	-
MIR169c	-	-		0	-	-		-	-		0	-	-
MIR169d	0	0		3	0	0		-	-		0	-	-
MIR169e	0	0		19	0	0		0	0		4	0	0
MIR169f	0	0		3	0	0		-	-		0	-	-
MIR169g	0	0		27	0	0		0	0		11	0	0
MIR169h	-	-		0	-	-		0	0		29	0	0
MIR169i	-	-		0	-	-		-	-		0	-	-
MIR169j	0	0		15	0	0		0	0		40	0	0
MIR169k	-	-		0	-	-		0	0		5	0	0
MIR169l	0	0		42	0	0		0	0		27	0	0
MIR169m	-	-		0	-	-		0	0		1	0	0
MIR169n	0	0		7	0	0		0	0		12	0	0
MIR170	0.78	0.01		93	73	1		0.11	0		9	1	0
MIR171a	0.75	0		120	90	0		0.8	0		158	127	0
MIR171b	0.78	0.21		41	32	9		0.69	0.17		193	135	34
MIR171c	0.77	0.15		385	299	61		0.01	0.57		75	1	43
MIR172a	0.83	0		131	109	0		0.13	0		536	70	0
MIR172b	0.9	0		582	525	1		0.81	0		184	150	0
MIR172c	1	0		1	1	0		-	-		0	-	-
MIR172d	1	0		54	54	0		1	0		50	50	0
MIR172e	0.44	0		9	4	0		-	-		0	-	-
MIR173	0.83	0		6	5	0		0.22	0		22	5	0
MIR319a	0.02	0.31		35	1	11		0	0.11		137	0	16
MIR319b	0.5	0		2	1	0		0.03	0.1		55	2	6
MIR319c	0.38	0.11		34	13	4		0.52	0		155	82	0
MIR390a	0.93	0		44	41	0		0.84	0		79	67	0
MIR390b	0.67	0.07		64	43	5		0.47	0		23	11	0
MIR391	0.71	0		32	23	0		0.9	0		31	28	0
MIR393a	0	0		4	0	0		1	0		140	140	0
MIR393b	0.25	0		24	6	0		1	0		17	17	0
MIR394a	0	0		5	0	0		0	0		11	0	0
MIR394b	0	0		8	0	0		0	0		46	0	0
MIR395a	1	0		11	11	0		-	-		0	-	-
MIR395b	0.97	0		142	138	0		-	-		0	-	-
MIR395c	1	0		6	6	0		-	-		0	-	-
MIR395d	-	-		0	-	-		-	-		0	-	-
MIR396a	0.85	0.05		70	60	4		0.83	0.16		6	5	1
MIR396b	0.59	0		37	22	0		0.66	0		3	2	0
MIR397a	0.63	0		11	7	0		0.33	0		3	1	0
MIR397b	-	-		0	-	-		-	-		0	-	-
MIR398a	-	-		0	-	-		-	-		0	-	-
MIR398b	0.89	0		4926	4405	9		0.92	0		125	115	0
MIR398c	0.85	0		5680	4842	9		1	0		8	8	0
MIR399a	-	-		0	-	-		1	0		1	1	0
MIR399b	0.28	0		25	7	0		0	0		19	0	0
MIR399c	0.88	0		18	16	0		0	0		1	0	0
MIR399d	1	0		1	1	0		-	-		0	-	-
MIR399e	-	-		0	-	-		-	-		0	-	-
MIR399f	1	0		2	2	0		-	-		0	-	-
MIR400	0.38	0.42		42	16	18		0	1		2	0	2
MIR401	-	-		0	-	-		0	0		2	0	0
MIR402	0	0		5	0	0		0	0		60	0	0
MIR403	0.62	0		8	5	0		1	0		2	2	0
MIR404	0	0		2	0	0		0	0		27	0	0
MIR405a	0	0		1	0	0		0	0		4	0	0
MIR405b	0	0		2359	0	0		0	0		2110	0	0
MIR405d	0	0		2359	0	0		0	0		2110	0	0
MIR407	0	0		15	0	0		0	0		14	0	0
MIR408	0.76	0.01		399	305	6		0.5	0.07		112	57	8
MIR413	0	0		1	0	0		0	0		5	0	0
MIR414	0.11	0		9	1	0		0	0.03		114	0	4
MIR416	0	0		63	0	0		0	0		74	0	0
MIR417	-	-		0	-	-		-	-		0	-	-
MIR418	-	-		0	-	-		0	0		20	0	0
MIR419	0	0		10	0	0		0	0		12	0	0
MIR420	0	0		2	0	0		0.12	0		25	3	0
MIR426	-	-		0	-	-		0	0		3	0	0
MIR447a	0	0		21	0	0		0	0		348	0	0
MIR447b	0	0		4	0	0		0	0		256	0	0
MIR447c	-	-		0	-	-		0	0		2	0	0
MIr472a	0	0		994	0	0		0	0.33		3	0	1
MIR771	0.53	0		15	8	0		-	-		0	-	-
MIR773a	0	0		7	0	0		-	-		0	-	-
MIR774	-	-		0	-	-		0	0		1	0	0
MIR775	0.62	0		37	23	0		0.25	0		8	2	0
MIR776	0.81	0.1		37	30	4		1	0		1	1	0
MIR777	0	0		1	0	0		-	-		0	-	-
MIR778	-	-		0	-	-		-	-		0	-	-
MIR779.1	0	0		1280	10	5		0	0		36	0	0
MIR779.2	0.13	0.17		1242	164	222		0.06	0.66		33	2	22
MIR780	0	0		23	0	0		0	0		3	0	0
MIR781	0.44	0		25	11	0		-	-		0	-	-
MIR822	0.02	0		1557	33	2		0	0		201	1	0
MIR823	-	-		0	-	-		-	-		0	-	-
MIR824	0.98	0		595	588	0		0.78	0		23	18	0
MIR825	0.43	0.05		323	141	19		0	0.5		2	0	1
MIR826	0.25	0		4	1	0		-	-		0	-	-
MIR827	0.77	0		9	7	0		-	-		0	-	-
MIR828	-	-		0	-	-		-	-		0	-	-
MIR829.1	-	-		0	-	-		-	-		0	-	-
MIR829.2	-	-		0	-	-		-	-		0	-	-
MIR830	0.18	0.01		79	15	1		0	0		8	0	0
MIR831	0	0		2	0	0		-	-		0	-	-
MIR832	-	-		0	-	-		-	-		0	-	-
MIR833	0	0.44		18		8		0	0.43		16	0	7
MIR834	0.52	0		19	10	0		0	0		4	0	0
MIR836	-	-		0	-	-		-	-		0	-	-
MIR837	-	-		0	-	-		-	-		0	-	-
MIR838	0	0		2	0	0		-	-		0	-	-
MIR839	0.14	0		7	1	0		0	0		6	0	0
MIR841	0	0		135	1	0		0	0		21	0	0
MIR842	1	0		1	1	0		-	-		0	-	-
MIR843	0	0		3	0	0		-	-		0	-	-
MIR845a	-	-		0	-	-		-	-		0	-	-
MIR845b	-	-		0	-	-		0	0		5	0	0
MIR846	0.31	0		16	5	0		0	0.6		5	0	3
MIR847	1	0		11	11	0		0.33	0		3	1	0
MIR848	0.02	0.02		46	1	1		-	-		0	-	-
MIR849	0	0		18	0	0		-	-		0	-	-
MIR850	0.26	0.07		99	26	7		-	-		0	-	-
MIR851-3p	0.07	0		52	4	0		-	-		0	-	-
MIR851-5p	0.57	0.01		52	30	1		-	-		0	-	-
MIR852	-	-		0	-	-		-	-		0	-	-
MIR853	0.38	0.05		18	7	1		-	-		0	-	-
MIR856	0.25	0.01		58	15	1		-	-		0	-	-
MIR857a	-	-		0	-	-		-	-		0	-	-
MIR858	-	-		0	-	-		-	-		0	-	-
MIR859	0.28	0		7	2	0		-	-		0	-	-
MIR860	0.07	0.01		70	5	1		0	0		5	0	0
MIR862	0	0		35	0	0		-	-		0	-	-
MIR863-3p	0	0		1188	6	2		-	-		0	-	-
MIR863-5p	0	0		1450	6	2		-	-		0	-	-
MIR864	1	0		13	13	0		-	-		0	-	-
MIR865-3p	0.1	0		20	2	0		0	0		1	0	0
MIR865-5p	0.45	0		20	9	0		0	0		1	0	0
MIR867	-	-		0	-	-		-	-		0	-	-
MIR868-3p	-	-		0	-	-		-	-		0	-	-
MIR868-5p	-	-		0	-	-		-	-		0	-	-
MIR869.1	-	-		0	-	-		-	-		0	-	-
MIR869.2	-	-		0	-	-		-	-		0	-	-
MIR870	0	0.01		67		1		-	-		0	-	-
Total				36754	19466	693
1 The number of cuts include the flanking sites of the miRNA/miRNA* and the contiguous sites.

## Sheet: Conserved
	fiery							Columbia
	Cuts flanking miRNA/miRNA* 1			Cuts flanking miRNA/miRNA* 1				Cuts flanking miRNA/miRNA* 1			Cuts flanking miRNA/miRNA* 1
	(%)			(absolute number of reads)				(%)			(absolute number of reads)
MIRNA	proximal	distal		Total	proximal	distal		proximal	distal		Total	proximal	distal
MIR156a	0.73	0.23		30	22	7		0.66	0.33		3	2	1
MIR156b	0.74	0.05		59	44	3		0.66	0		3	2	0
MIR156c	0.9	0.05		585	530	32		0.71	0.28		7	5	2
MIR156d	0.24	0.43		236	58	102		0.3	0.6		10	3	6
MIR156e	-	-		0	-	-		-	-		0	-	-
MIR156f	-	-		0	-	-		-	-		0	-	-
MIR156g	0	0.5		2	0	1		0	0		3	0	0
MIR156h	0.68	0.18		16	11	3		-	-		0	-	-
MIR157a	-	-		0	-	-		-	-		0	-	-
MIR157b	0	0		1	0	0		-	-		0	-	-
MIR157c	0	0		6	0	0		-	-		0	-	-
MIR157d	-	-		0	-	-		1	0		1	1	0
MIR159a	-	-		0	-	-		0.37	0.04		24	9	1
MIR159b	0.69	0.06		43	30	3		0.03	0.06		30	1	2
MIR159c	-	-		0	-	-		-	-		0	-	-
MIR160a	0.68	0.28		342	235	99		0.25	0.5		8	2	4
MIR160b	0	0.66		3	0	2		-	-		0	-	-
MIR160c	0.25	0.25		4	1	1		0.22	0.38		36	8	14
MIR162a	0	0		1	0	0		0.33	0		3	1	0
MIR162b	0.54	0.36		11	6	4		0.36	0.54		11	4	6
MIR164a	-	-		0	-	-		0	0		7	0	0
MIR164b	0.78	0		1972	1543	7		0.94	0		17	16	0
MIR164c	1	0		9	9	0		0.28	0		7	2	0
MIR165a	0.9	0		11	10	0		1	0		33	33	0
MIR165b	0.96	0		25	24	0		1	0		57	57	0
MIR166a	0.97	0		127	124	0		0.96	0		131	126	0
MIR166b	0.86	0		181	157	0		0.94	0		401	380	0
MIR166c	-	-		0	-	-		0	0		4	0	0
MIR166d	1	0		1	1	0		1	0		1	1	0
MIR166e	0.88	0		60	53	0		0.92	0		99	92	0
MIR166f	0.27	0		29	8	0		0	0		17	0	0
MIR166g	-	-		0	-	-		-	-		0	-	-
MIR167a	0.94	0		100	94	0		0.11	0		34	4	0
MIR167b	0.69	0.01		185	129	3		0	0		9	0	0
MIR167c	0	0		1	0	0		0	0		3	0	0
MIR167d	0.97	0		73	71	0		0.69	0		33	23	0
MIR168a	0.98	0		2922	2887	0		0.93	0		957	893	5
MIR168b	0.98	0.01		60	59	1		0.85	0		75	64	0
MIR169a	0.94	0		596	565	0		0.69	0		26	18	0
MIR169b	0	0		3	0	0		-	-		0	-	-
MIR169c	-	-		0	-	-		-	-		0	-	-
MIR169d	0	0		3	0	0		-	-		0	-	-
MIR169e	0	0		19	0	0		0	0		4	0	0
MIR169f	0	0		3	0	0		-	-		0	-	-
MIR169g	0	0		27	0	0		0	0		11	0	0
MIR169h	-	-		0	-	-		0	0		29	0	0
MIR169i	-	-		0	-	-		-	-		0	-	-
MIR169j	0	0		15	0	0		0	0		40	0	0
MIR169k	-	-		0	-	-		0	0		5	0	0
MIR169l	0	0		42	0	0		0	0		27	0	0
MIR169m	-	-		0	-	-		0	0		1	0	0
MIR169n	0	0		7	0	0		0	0		12	0	0
MIR170	0.78	0.01		93	73	1		0.11	0		9	1	0
MIR171a	0.75	0		120	90	0		0.8	0		158	127	0
MIR171b	0.78	0.21		41	32	9		0.69	0.17		193	135	34
MIR171c	0.77	0.15		385	299	61		0.01	0.57		75	1	43
MIR172a	0.83	0		131	109	0		0.13	0		536	70	0
MIR172b	0.9	0		582	525	1		0.81	0		184	150	0
MIR172c	1	0		1	1	0		-	-		0	-	-
MIR172d	1	0		54	54	0		1	0		50	50	0
MIR172e	0.44	0		9	4	0		-	-		0	-	-
MIR319a	0.02	0.31		35	1	11		0	0.11		137	0	16
MIR319b	0.5	0		2	1	0		0.03	0.1		55	2	6
MIR319c	0.38	0.11		34	13	4		0.52	0		155	82	0
MIR390a	0.93	0		44	41	0		0.84	0		79	67	0
MIR390b	0.67	0.07		64	43	5		0.47	0		23	11	0
MIR391	0.71	0		32	23	0		0.9	0		31	28	0
MIR393a	0	0		4	0	0		1	0		140	140	0
MIR393b	0.25	0		24	6	0		1	0		17	17	0
MIR394a	0	0		5	0	0		0	0		11	0	0
MIR394b	0	0		8	0	0		0	0		46	0	0
MIR395a	1	0		11	11	0		-	-		0	-	-
MIR395b	0.97	0		142	138	0		-	-		0	-	-
MIR395c	1	0		6	6	0		-	-		0	-	-
MIR395d	-	-		0	-	-		-	-		0	-	-
MIR396a	0.85	0.05		70	60	4		0.83	0.16		6	5	1
MIR396b	0.59	0		37	22	0		0.66	0		3	2	0
MIR397a	0.63	0		11	7	0		0.33	0		3	1	0
MIR397b	-	-		0	-	-		-	-		0	-	-
MIR398a	-	-		0	-	-		-	-		0	-	-
MIR398b	0.89	0		4926	4405	9		0.92	0		125	115	0
MIR398c	0.85	0		5680	4842	9		1	0		8	8	0
MIR399a	-	-		0	-	-		1	0		1	1	0
MIR399b	0.28	0		25	7	0		0	0		19	0	0
MIR399c	0.88	0		18	16	0		0	0		1	0	0
MIR399d	1	0		1	1	0		-	-		0	-	-
MIR399e	-	-		0	-	-		-	-		0	-	-
MIR399f	1	0		2	2	0		-	-		0	-	-
MIR408	0.76	0.01		399	305	6		0.5	0.07		112	57	8
MIR827	0.77	0		9	7	0		-	-		0	-	-
Total				20815	17815	388					4356	2817	149
1 The number of cuts include the flanking sites of the miRNA/miRNA* and the contiguous sites.

## Sheet: Young
	fiery							Columbia
	Cuts flanking miRNA/miRNA* 1			Cuts flanking miRNA/miRNA* 1				Cuts flanking miRNA/miRNA* 1			Cuts flanking miRNA/miRNA* 1
	(%)			(absolute number of reads)				(%)			(absolute number of reads)
MIRNA	proximal	distal		Total	proximal	distal		proximal	distal		Total	proximal	distal
MIR158a	0.87	0		409	356	1		0.25	0		4	1	0
MIR158b	0	0		3	0	0		-	-		0	-	-
MIR161.1	0.77	0		662	515	0		0.46	0		52	24	0
MIR161.2	0.12	0.01		663	83	8		0.38	0		52	20	0
MIR163	0.01	0		311	6	0		0.08	0		34	3	0
MIR173	0.83	0		6	5	0		0.22	0		22	5	0
MIR400	0.38	0.42		42	16	18		0	1		2	0	2
MIR401	-	-		0	-	-		0	0		2	0	0
MIR402	0	0		5	0	0		0	0		60	0	0
MIR403	0.62	0		8	5	0		1	0		2	2	0
MIR404	0	0		2	0	0		0	0		27	0	0
MIR405a	0	0		1	0	0		0	0		4	0	0
MIR405b	0	0		2359	0	0		0	0		2110	0	0
MIR405d	0	0		2359	0	0		0	0		2110	0	0
MIR407	0	0		15	0	0		0	0		14	0	0
MIR413	0	0		1	0	0		0	0		5	0	0
MIR414	0.11	0		9	1	0		0	0.03		114	0	4
MIR416	0	0		63	0	0		0	0		74	0	0
MIR417	-	-		0	-	-		-	-		0	-	-
MIR418	-	-		0	-	-		0	0		20	0	0
MIR419	0	0		10	0	0		0	0		12	0	0
MIR420	0	0		2	0	0		0.12	0		25	3	0
MIR426	-	-		0	-	-		0	0		3	0	0
MIR447a	0	0		21	0	0		0	0		348	0	0
MIR447b	0	0		4	0	0		0	0		256	0	0
MIR447c	-	-		0	-	-		0	0		2	0	0
MIr472a	0	0		994	0	0		0	0.33		3	0	1
MIR771	0.53	0		15	8	0		-	-		0	-	-
MIR773a	0	0		7	0	0		-	-		0	-	-
MIR774	-	-		0	-	-		0	0		1	0	0
MIR775	0.62	0		37	23	0		0.25	0		8	2	0
MIR776	0.81	0.1		37	30	4		1	0		1	1	0
MIR777	0	0		1	0	0		-	-		0	-	-
MIR778	-	-		0	-	-		-	-		0	-	-
MIR779.1	0	0		1280	10	5		0	0		36	0	0
MIR779.2	0.13	0.17		1242	164	222		0.06	0.66		33	2	22
MIR780	0	0		23	0	0		0	0		3	0	0
MIR781	0.44	0		25	11	0		-	-		0	-	-
MIR822	0.02	0		1557	33	2		0	0		201	1	0
MIR823	-	-		0	-	-		-	-		0	-	-
MIR824	0.98	0		595	588	0		0.78	0		23	18	0
MIR825	0.43	0.05		323	141	19		0	0.5		2	0	1
MIR826	0.25	0		4	1	0		-	-		0	-	-
MIR828	-	-		0	-	-		-	-		0	-	-
MIR829.1	-	-		0	-	-		-	-		0	-	-
MIR829.2	-	-		0	-	-		-	-		0	-	-
MIR830	0.18	0.01		79	15	1		0	0		8	0	0
MIR831	0	0		2	0	0		-	-		0	-	-
MIR832	-	-		0	-	-		-	-		0	-	-
MIR833	0	0.44		18		8		0	0.43		16	0	7
MIR834	0.52	0		19	10	0		0	0		4	0	0
MIR836	-	-		0	-	-		-	-		0	-	-
MIR837	-	-		0	-	-		-	-		0	-	-
MIR838	0	0		2	0	0		-	-		0	-	-
MIR839	0.14	0		7	1	0		0	0		6	0	0
MIR841	0	0		135	1	0		0	0		21	0	0
MIR842	1	0		1	1	0		-	-		0	-	-
MIR843	0	0		3	0	0		-	-		0	-	-
MIR845a	-	-		0	-	-		-	-		0	-	-
MIR845b	-	-		0	-	-		0	0		5	0	0
MIR846	0.31	0		16	5	0		0	0.6		5	0	3
MIR847	1	0		11	11	0		0.33	0		3	1	0
MIR848	0.02	0.02		46	1	1		-	-		0	-	-
MIR849	0	0		18	0	0		-	-		0	-	-
MIR850	0.26	0.07		99	26	7		-	-		0	-	-
MIR851-3p	0.07	0		52	4	0		-	-		0	-	-
MIR851-5p	0.57	0.01		52	30	1		-	-		0	-	-
MIR852	-	-		0	-	-		-	-		0	-	-
MIR853	0.38	0.05		18	7	1		-	-		0	-	-
MIR856	0.25	0.01		58	15	1		-	-		0	-	-
MIR857a	-	-		0	-	-		-	-		0	-	-
MIR858	-	-		0	-	-		-	-		0	-	-
MIR859	0.28	0		7	2	0		-	-		0	-	-
MIR860	0.07	0.01		70	5	1		0	0		5	0	0
MIR862	0	0		35	0	0		-	-		0	-	-
MIR863-3p	0	0		1188	6	2		-	-		0	-	-
MIR863-5p	0	0		1450	6	2		-	-		0	-	-
MIR864	1	0		13	13	0		-	-		0	-	-
MIR865-3p	0.1	0		20	2	0		0	0		1	0	0
MIR865-5p	0.45	0		20	9	0		0	0		1	0	0
MIR867	-	-		0	-	-		-	-		0	-	-
MIR868-3p	-	-		0	-	-		-	-		0	-	-
MIR868-5p	-	-		0	-	-		-	-		0	-	-
MIR869.1	-	-		0	-	-		-	-		0	-	-
MIR869.2	-	-		0	-	-		-	-		0	-	-
MIR870	0	0.01		67		1		-	-		0	-	-
Total				16601	2166	305
1 The number of cuts include the flanking sites of the miRNA/miRNA* and the contiguous sites.
				0.148846		0.432432
