# Supplementary material for: Multiple RNA recognition patterns during microRNA biogenesis in plants
Source: HighWire-hosted journal article supplement (doi:10.1101/gr.153387.112), 2013-08-29
Supplement: Table_S4.docx [file Table_S4.docx]

**Supplemental Table 4**

List of binary plasmids and sequences of mutant precursors.

| ***35S:MIR171a*** | ATCCGCACTTTAAGCATGAGAGAGTCCCTTTGATATTGGCCTGGTTCACTCAGATCTTACCTGACCACACACGTAGATATACATTATTCTCTCTAGATTATCTGATTGAGCCGCGCCAATATCTCAGTACTCTCTCGTCTCTATTTTGGACTT |
| --- | --- |
| ***35S:MIR171b*** | TCGAACAAGAGTGGTTTTATGCAAGGTAACGCGAGATATTAGTGCGGTTCAATCAAATAGTCGTCCTCTTAACTCATGGAGAACGGTGTTGTTCGATTGAGCCGTGCCAATATCACGCGGTAAACCAAAAATGGCAAAGATAGTTATT |
| ***35S:MIR171a Δupper region*** | ATCCGCACTTTAAGCATGAGAGAGTCCCTTTGATATTGGCCTGGTTCACTCAGATCTTACCTGCTCTAGATTATCTGATTGAGCCGCGCCAATATCTCAGTACTCTCTCGTCTCTATTTTGGACTT |
| ***35S:MIR171b Δupper region*** | TCGAACAAGAGTGGTTTTATGCAAGGTAACGCGAGATATTAGTGCGGTTCAATCAAATAGTGTTGTTCGATTGAGCCGTGCCAATATCACGCGGTAAACCAAAAATGGCAAAGATAGTTATT |
| ***35S:MIR171a Δlower region*** | AGTCCCTTTGATATTGGCCTGGTTCACTCAGATCTTACCTGACCACACACGTAGATATACATTATTCTCTCTAGATTATCTGATTGAGCCGCGCCAATATCTCAGTACT |
| ***35S:MIR171b Δlower region*** | AAGGTAACGCGAGATATTAGTGCGGTTCAATCAAATAGTCGTCCTCTTAACTCATGGAGAACGGTGTTGTTCGATTGAGCCGTGCCAATATCACGCGGTAAACC |
| ***35S:MIR172a*** | CCGGAGCCACGGTCGTTGTTGGCTGCTGTGGCATCATCAAGATTCACATCTGTTGATGGACGGTGGTGATTCACTCTCCACAAAGTTCTCTATGAAAATGAGAATCTTGATGATGCTGCATCGGCAATCAACGACTATTCTTTCC |
| ***35S:MIR319a*** | TAGGAATATATATGTAGAGAGAGCTTCCTTGAGTCCATTCACAGGTCGTGATATGATTCAATTAGCTTCCGACTCATTCATCCAAATACCGAGTCGCCAAAATTCAAACTAGACTCGTTAAATGAATGAATGATGCGGTAGACAAATTGGATCATTGATTCTCTTTGATTGGACTGAAGGGAGCTCCCTCTCTCTTTTGTATTCC |
| ***35S:MIR319short*** | TAGGAATATATATGTAGAGAGAGCTTCCTTGAGTCCATTCACAGGTCGTGATATGATTCAATTAATTGGATCATTGATTCTCTTTGATTGGACTGAAGGGAGCTCCCTCTCTCTTTTGTATTCC |
| ***35S:MIR319short+LS*** | TAGGAATATATAAGAGAGAGAGAGCTTCCTTGAGTCCATTCACAGGTCGTGATATGATTCAATTAATTGGATCATTGATTCTCTTTGATTGGACTGAAGGGAGCTCCCTCTCTCTTTTGTATTCC |
| ***35S:MIR319short+LS2*** | CCCCCCGATTTGATGTTTTAGGAATATATAAGAGAGAGAGAGCTTCCTTGAGTCCATTCACAGGTCGTGATATGATTCAATTAATTGGATCATTGATTCTCTTTGATTGGACTGAAGGGAGCTCCCTCTCTCTTTTGTATTCAAATTTTCTTGATTCGGGGG |

All constructs were cloned in the binary vector pCHF3 (Jarvis, P., Chen, L. J., Li, H., Peto, C. A., Fankhauser, C., and Chory, J. (1998). An Arabidopsis mutant defective in the plastid general protein import apparatus. Science 282, 100103). T‑DNA constructs were introduced into *A. tumefaciens* strain ASE (Fraley, R. T., Rogers, S. G., Horsch, R. B., Eichholtz, D. A., Flick, J. S., Fink, C. L., Hoffmann, N. L., and Sanders, P. R. (1985) The SEV system: a new disarmed Ti plasmid vector system for plant transformation. Biotechnology 3, 629635).
